# Supplementary material for: Quantification of dissolution and diagenetic overgrowth in early Eocene calcareous nannofossils through circular polarised light microscopy
Source: Copernicus journal article supplement (doi:10.5194/jm-44-673-2025), 2025-12-12
Supplement: Supplementary file 1 [file Supplementary_material_1_r1.xlsx]

## Sheet: Placolith
Core sample	Core section	Depth interval (cm)	Age (Ma)	Sample Depth (m)	%CaCO3	Palaeowater depth (m)	Longitude (°)	Latitude (°)	Sample size Isochrysidales	Sample size Coccolithaceae	Isochrysidales length median (μm)	Isochrysidales length stdev (μm)	Coccolithaceae length median (μm)	Coccolithaceae length stdev (μm)	Isochrysidales width median (μm)	Isochrysidales width stdev (μm)	Coccolithaceae width median (μm)	Coccolithaceae width stdev (μm)	Isochrysidales volume median (μm3)	Isochrysidales volume stdev (μm3)	Coccolithaceae volume median (μm3)	Coccolithaceae volume stdev (μm3)	Isochrysidales thickness (μm) median	Isochrysidales thickness (μm) stdev	Coccolithaceae thickness (μm) median	Coccolithaceae thickness (μm) stdev	Isochrysidales ks median	Isochrysidales ks stdev	Coccolithaceae ks median	Coccolithaceae ks stdev	Isochrysidales kse median	Isochrysidales kse stdev	Coccolithaceae kse median	Coccolithaceae kse stdev	Sample size Isochrysidales + circular	Sample size Coccolithaceae + elliptical	Isochrysidales + circular length median	Isochrysidales + circular length stdev	Coccolithaceae + elliptical length median (μm)	Coccolithaceae + elliptical length stdev (μm)	Isochrysidales + circular width median (μm)	Isochrysidales + circular width stdev (μm)	Coccolithaceae + elliptical width median (μm)	Coccolithaceae + elliptical width stdev (μm)	Isochrysidales + circular volume median (μm3)	Isochrysidales + circular volume stdev (μm3)	Coccolithaceae + elliptical volume median (μm3)	Coccolithaceae + elliptical volume stdev (μm3)	Isochrysidales + circular thickness (μm) median
277	41R-2W	25-27	51.2439	417.25	85.01	2200	166.191	-52.2238	44	62	5.29	1.39576	6.44	1.75553	4.28	1.00954	4.885	1.49411	7.64	8.71991	12.715	13.5106	0.44981	0.134837	0.548393	0.125381	0.0516091	0.0634504	0.0476057	0.0553534	0.153377	0.0385624	0.158786	0.0375953	59	86	5.24	1.27079	5.94	1.71215	4.23	0.948681	4.525	1.44757	7.19	7.89988	10.295	12.4686	0.434672
356	16R-1W	79-80	51.6514	285	14.6651	2200	-41.088	-28.287	41	10	6.25	1.96662	8.6	1.89563	5.19	1.82746	6.595	1.60637	7.41	11.3197	15.59	12.4217	0.31279	0.109007	0.421261	0.145888	0.0303514	0.0492278	0.0245104	0.0216555	0.0942659	0.0151878	0.0813845	0.023733	48	27	6.155	1.97693	6.21	2.21756	4.955	1.81478	4.65	1.81743	5.98	10.883	6.51	10.4819	0.299165
401	12R-1W	112-113	52.0878	179.5	68.1687	2000	-8.81033	47.4275	40	29	5.365	2.16011	7.64	2.26872	4.125	2.07337	6.38	2.15466	8.65	19.7788	20.26	25.9007	0.468252	0.123087	0.554396	0.134112	0.0560153	0.133908	0.0454317	0.062605	0.144434	0.0394913	0.131453	0.0266736	46	52	5.365	2.07501	6.41	2.44076	4.165	1.98566	4.995	2.20433	8.35	18.7526	11.81	22.6492	0.465422
527	19R-4W	10-11	51.6454	161	100	2700	1.76333	-28.0415	49	40	6.69	1.96191	7.015	3.52499	5.4	1.89363	5.62	2.82765	13.21	19.6089	18.7	47.9528	0.481637	0.144538	0.611826	0.120755	0.0441189	0.0692179	0.05417	0.146692	0.135383	0.0403682	0.152247	0.0316487	140	119	5.98	1.67091	6.05	2.49065	5.08	1.46881	4.88	2.0327	7.52	13.4838	11.02	30.2586	0.346761
577	8H-6W	80-82	50.7516	63.8	100	2400	157.723	32.4418	24	25	7.375	1.75113	8.27	2.2757	6.295	1.50585	6.43	1.79126	20.04	16.3645	12.59	25.8556	0.572571	0.189334	0.438323	0.246182	0.0499588	0.0456775	0.0222592	0.0469278	0.127576	0.0373999	0.115003	0.0493432	47	59	6.91	1.67107	6.71	2.29765	5.46	1.51664	4.84	1.79052	9.37	15.2158	9.06	18.8853	0.378782
690B	15H-4W	70-72	51.4232	128.1	96.8613	1900	1.2049	-65.1605	135	50	6.46	1.32163	7.64	2.14596	5.44	1.15295	5.945	1.70221	12.1	7.93122	18.17	18.6451	0.440312	0.13954	0.528196	0.112847	0.0448836	0.0334439	0.040745	0.0462715	0.125632	0.0334229	0.122205	0.030253	146	124	6.42	1.36823	5.9	2.18266	5.36	1.18552	4.695	1.74119	11.915	7.95934	8.735	14.7992	0.440179
762C	19X-4W	46-47	50.3666	331.5	69.5336	1200	112.254	-19.887	33	24	7.2	2.05801	7.965	1.79336	6.05	1.83123	6.61	1.14352	22.58	22.192	18.67	8.93013	0.597287	0.148088	0.512914	0.113865	0.060496	0.066574	0.0369477	0.0228021	0.140218	0.0336098	0.123501	0.0309264	44	73	6.69	2.04922	6.38	1.75971	5.52	1.81492	4.83	1.31309	13.065	21.2982	10.7	7.94395	0.551876
865B	9H-4W	110-112	50.7102	75	95.5596	1400	-179.556	18.4403	24	10	7.485	1.35239	7.75	1.33929	6.09	1.2925	6.32	0.976151	25.02	14.5781	18.075	6.0987	0.796405	0.246853	0.522191	0.171729	0.0596639	0.0394607	0.0388305	0.0175141	0.17841	0.0571939	0.122166	0.0465228	30	19	7.405	1.75148	7.14	1.77156	5.945	1.74854	5.96	1.52461	23.37	17.4302	14.05	6.88068	0.720491
883B	82X-6W	125-127	50.5661	779.2	78.4966	2000	167.769	51.1985	22	4	6.99	2.28757	8.49	1.74451	5.735	1.3574	7.225	1.07662	19.01	10.8729	34.745	22.0921	0.592151	0.111317	0.729693	0.185302	0.0556609	0.0448214	0.0567766	0.041371	0.151003	0.0349241	0.168979	0.0266988	27	23	6.78	2.25296	5.03	1.85031	5.46	1.35579	3.84	1.46136	17.7	10.7853	7.33	15.3481	0.587322
929E	26R-2W	50-51	52.928	712.2	16.2377	3500	-43.74	5.9761	12	10	8.695	2.08635	8.76	1.69686	6.875	1.8346	6.195	1.7684	24.27	13.3604	15.315	13.7962	0.494039	0.120181	0.371004	0.11463	0.0369199	0.0254658	0.0227827	0.0219005	0.130637	0.0378384	0.0869846	0.0241961	13	20	8.84	2.13304	8.21	2.13596	7.09	1.80713	5.905	1.73431	28.28	12.9036	14.78	11.8964	0.478929
1051A	45X-7W	24-25	52.635	418.7	54.5141	1500	-76.3576	30.0529	105	14	4.49	1.02606	8.195	1.85322	3.75	0.74414	6.66	1.9408	4.93	2.94767	25.315	26.6649	0.397132	0.0825773	0.689089	0.202326	0.0544638	0.039053	0.0459972	0.0516913	0.15437	0.044458	0.142735	0.0395996	129	31	4.49	1.0033	6.51	2.32578	3.73	0.750618	4.59	2.11473	5.25	2.76971	8.74	22.9786	0.405605
1209A_20H	20H-7W	20-22	52.9851	179.2	95.8202	1900	158.506	32.6517	93	26	5.07	1.8015	7.225	2.46517	4.04	1.53376	5.37	2.26099	5.65	10.6416	12.385	24.6584	0.396422	0.119612	0.482644	0.179039	0.0433535	0.0859039	0.0328384	0.0682003	0.129143	0.0397039	0.111149	0.0299522	131	77	4.98	1.58502	6.17	2.05114	3.96	1.3561	4.79	1.80802	4.8	9.40546	9.69	16.7219	0.369342
1209A_21H	21H-2W	40-42	53.4121	188.7	86.2411	1900	158.506	32.6517	89	20	4.77	1.04322	7.815	1.39639	4.02	0.951234	5.935	1.34195	7.17	5.83934	18.87	12.6525	0.495056	0.096979	0.551707	0.145475	0.0660639	0.0593386	0.0395353	0.0291963	0.181719	0.0411166	0.146681	0.03255	112	34	4.96	1.06951	6.19	1.68444	4.06	0.977935	4.925	1.40511	7.235	6.08204	13.025	12.254	0.488331
1257A	10X-3W	90-91	51.3966	73.3	61.7809	2000	-54.342	9.4538	135	20	5.86	1.45834	8.735	3.10198	4.74	1.24988	6.975	2.30839	9.94	10.2654	28.875	32.8682	0.46558	0.108493	0.665452	0.113124	0.0493962	0.0552785	0.0433245	0.0560553	0.142353	0.0286085	0.132902	0.0360306	145	51	5.76	1.43415	6.23	2.97725	4.62	1.21991	4.53	2.37286	9.7	10.0429	9.3	27.0417	0.464133
1331C	17-3W	82-84	50.6633	177	81.8697	3000	-142.162	12.0681	29	35	7.62	1.28287	10.01	2.40113	6.46	1.26968	8.63	2.10799	21.99	12.4181	52.58	38.5539	0.594305	0.178493	0.783372	0.192068	0.0497004	0.0315875	0.0524226	0.0441802	0.129365	0.052639	0.136296	0.0252678	71	44	7.09	1.34989	9.63	2.42813	5.98	1.25183	7.975	2.14699	13.28	11.158	39.35	37.8212	0.417347
Bass River			56	349.21	13.2831	100	-74.4367	39.6117	72	21	5.155	1.2939	6.6	1.93814	3.975	1.14596	5.19	1.3465	6.575	5.61161	13.57	10.2799	0.433871	0.0838346	0.501593	0.130505	0.0479965	0.0459721	0.0472007	0.0430687	0.166065	0.0329763	0.151444	0.0449414	84	47	5.125	1.26951	6.14	2.15543	3.905	1.11517	4.7	1.55674	6.42	5.39195	10.97	9.1119	0.432403
[truncated: 14 more columns]

## Sheet: Placolith correl matrix
Correlation matrix	Goes from -1 (dark red) to 1 (blue)
	Sample Depth (m)	%CaCO3	Palaeowater depth (m)	Longitude (°)	Latitude (°)	Sample size Isochrysidales	Sample size Coccolithaceae	Isochrysidales length median (μm)	Isochrysidales length stdev (μm)	Coccolithaceae length median (μm)	Coccolithaceae length stdev (μm)	Isochrysidales width median (μm)	Isochrysidales width stdev (μm)	Coccolithaceae width median (μm)	Coccolithaceae width stdev (μm)	Isochrysidales volume median (μm3)	Isochrysidales volume stdev (μm3)	Coccolithaceae volume median (μm3)	Coccolithaceae volume stdev (μm3)	Isochrysidales thickness (μm) median	Isochrysidales thickness (μm) stdev	Coccolithaceae thickness (μm) median	Coccolithaceae thickness (μm) stdev	Isochrysidales ks median	Isochrysidales ks stdev	Coccolithaceae ks median	Coccolithaceae ks stdev	Isochrysidales kse median	Isochrysidales kse stdev	Coccolithaceae kse median	Coccolithaceae kse stdev	Sample size Isochrysidales + indet	Sample size Coccolithaceae + indet	Isochrysidales + indet length median	Isochrysidales + indet length stdev	Coccolithaceae + indet length median (μm)	Coccolithaceae + indet length stdev (μm)	Isochrysidales + indet width median (μm)	Isochrysidales + indet width stdev (μm)	Coccolithaceae + indet width median (μm)	Coccolithaceae + indet width stdev (μm)	Isochrysidales + indet volume median (μm3)	Isochrysidales + indet volume stdev (μm3)	Coccolithaceae + indet volume median (μm3)	Coccolithaceae + indet volume stdev (μm3)	Isochrysidales + indet thickness (μm) median	Isochrysidales + indet thickness (μm) stdev	Coccolithaceae + indet thickness (μm) median	Coccolithaceae + indet thickness (μm) stdev
Sample Depth (m)	1
%CaCO3	-0.468909	1
Palaeowater depth (m)	0.129235	0.141204	1
Longitude (°)	0.19898	0.362813	0.0361957	1
Latitude (°)	0.12716	-0.096737	-0.20937	0.00746536	1
Sample size Isochrysidales	-0.365348	0.0950577	-0.31741	-0.0290617	-0.156582	1
Sample size Coccolithaceae	-0.326736	0.45437	0.129119	0.212669	-0.637947	0.218957	1
Isochrysidales length median (μm)	0.185616	0.000323656	0.523113	-0.217103	-0.155088	-0.622491	-0.188172	1
Isochrysidales length stdev (μm)	0.377133	-0.123392	0.309339	0.288409	0.0596599	-0.547486	-0.235377	0.4412	1
Coccolithaceae length median (μm)	0.0792738	-0.143119	0.505225	-0.328779	0.185312	-0.178019	-0.427138	0.511996	0.0770058	1
Coccolithaceae length stdev (μm)	-0.401629	0.228977	0.272089	-0.0780681	-0.147288	0.286128	0.325327	-0.0208983	0.179801	0.00880919	1
Isochrysidales width median (μm)	0.133307	0.0682031	0.520972	-0.178962	-0.186907	-0.589927	-0.162622	0.987718	0.378889	0.560504	-0.0330003	1
Isochrysidales width stdev (μm)	0.00830058	-0.144527	0.337507	0.0161008	-0.0447495	-0.504682	-0.125374	0.452073	0.860739	0.0814594	0.309566	0.386655	1
Coccolithaceae width median (μm)	0.0190139	-0.000747546	0.326915	-0.355231	0.239455	-0.198927	-0.349186	0.428934	0.0622027	0.926911	0.060435	0.486287	0.0430199	1
Coccolithaceae width stdev (μm)	-0.350539	0.152125	0.457461	-0.13461	-0.079926	0.291652	0.320646	-0.129453	0.0800036	0.0633963	0.87919	-0.150445	0.276774	0.031724	1
Isochrysidales volume median (μm3)	0.150715	0.153142	0.348158	-0.180465	0.00271247	-0.641916	-0.230101	0.931885	0.321044	0.476267	-0.171257	0.933213	0.306018	0.471225	-0.297499	1
Isochrysidales volume stdev (μm3)	-0.178704	0.235949	0.268549	0.0566459	-0.0811459	-0.568582	0.0426024	0.544606	0.699455	0.0748128	0.301805	0.518675	0.841001	0.152137	0.171023	0.549457	1
Coccolithaceae volume median (μm3)	0.0770257	0.112022	0.268487	-0.329476	0.201166	-0.0544857	-0.0944586	0.221752	-0.117111	0.72351	0.167825	0.265648	-0.183539	0.872653	0.128163	0.287411	-0.0462231	1
Coccolithaceae volume stdev (μm3)	-0.253578	0.349824	0.458709	-0.0937488	0.0450645	0.150886	0.251344	0.00949833	0.0786843	0.247693	0.862159	0.0237231	0.138158	0.334836	0.860062	-0.0758654	0.192835	0.483411	1
Isochrysidales thickness (μm) median	-0.0883478	0.432948	-0.00601284	-0.157802	0.216041	-0.483015	-0.186646	0.575541	0.0186809	0.209022	-0.262435	0.585598	0.00130322	0.339272	-0.427033	0.807909	0.406832	0.279936	-0.132526	1
Isochrysidales thickness (μm) stdev	-0.423617	0.533613	0.194358	-0.229048	-0.132716	-0.454974	0.115599	0.606703	0.0142815	0.154455	-0.051953	0.633582	0.160901	0.222973	-0.150251	0.70868	0.510285	0.0894762	-0.0134889	0.79276	1
Coccolithaceae thickness (μm) median	0.025568	0.310981	0.0119543	-0.163294	0.189627	0.187172	0.0747365	-0.157625	-0.256787	0.331347	0.273709	-0.112181	-0.401549	0.577182	0.188382	-0.0248224	-0.180423	0.8475	0.565806	0.187548	-0.0564557	1
Coccolithaceae thickness (μm) stdev	-0.0849243	0.299032	0.064342	0.107352	0.526857	-0.235903	-0.282394	0.040827	-0.126079	0.319057	-0.127059	0.113271	-0.246015	0.360534	-0.0503828	0.14781	-0.11461	0.237568	0.181851	0.251136	0.299212	0.203435	1
Isochrysidales ks median	-0.118186	0.462944	-0.39151	0.208887	0.368458	0.0144605	-0.0208714	-0.233481	-0.303866	-0.114639	-0.340653	-0.19249	-0.372229	0.0938938	-0.404266	0.113097	0.0296754	0.183966	-0.163158	0.564592	0.174339	0.394714	0.151177	1
Isochrysidales ks stdev	-0.25266	0.192849	-0.122742	0.297696	0.208035	0.0052487	0.204697	-0.445583	0.372995	-0.39433	0.263316	-0.492771	0.466115	-0.268856	0.321223	-0.398837	0.428836	-0.234097	0.160213	-0.202471	-0.151568	-0.0542627	-0.180237	0.210767	1
Coccolithaceae ks median	0.103509	0.272519	-0.20138	-0.0975122	0.06696	0.137673	0.279544	-0.275804	-0.174028	-0.150823	0.252327	-0.280162	-0.308656	0.148616	0.113281	-0.152659	-0.125303	0.550261	0.419611	0.136822	-0.130082	0.835279	-0.113828	0.403694	0.136059	1
Coccolithaceae ks stdev	-0.23435	0.382239	0.193706	0.0953397	-0.138197	0.171044	0.449068	-0.206706	0.135127	-0.365233	0.821611	-0.230435	0.199719	-0.2562	0.777917	-0.293287	0.22871	-0.0159744	0.790488	-0.240294	-0.0888009	0.276546	-0.099597	-0.151621	0.372787	0.456435	1
Isochrysidales kse median	0.0249922	0.196532	-0.480854	-0.00347853	0.404124	0.0744644	-0.0977018	-0.31165	-0.469015	-0.358204	-0.398612	-0.331857	-0.525939	-0.226939	-0.418976	-0.024449	-0.271139	-0.019049	-0.288932	0.461846	0.0404596	0.240382	-0.00594979	0.802467	0.030961	0.415485	-0.110339	1
Isochrysidales kse stdev	-0.161331	0.510454	0.0888684	-0.26709	0.282133	-0.207211	0.0918755	0.149962	-0.366387	0.0524755	-0.142816	0.151758	-0.279319	0.172331	-0.0109757	0.382662	0.0544143	0.32287	0.154012	0.664395	0.562667	0.357602	0.357684	0.526929	-0.0696312	0.322327	0.0727483	0.560189	1
Coccolithaceae kse median	0.126805	0.36075	-0.318777	0.222369	0.177165	0.129975	0.285259	-0.389088	-0.264188	-0.33796	0.0952874	-0.376329	-0.479587	-0.0683204	-0.0641556	-0.204146	-0.220711	0.313246	0.257466	0.174702	-0.166023	0.691166	0.0279247	0.600952	0.118797	0.879866	0.385755	0.623155	0.307708	1
Coccolithaceae kse stdev	-0.35716	0.202644	-0.513157	-0.050455	0.187757	0.0976949	0.0235978	-0.173723	-0.479181	-0.389548	-0.105666	-0.151945	-0.453127	-0.321986	-0.227294	-0.0114912	-0.173059	-0.342464	-0.182189	0.320143	0.318721	-0.109464	0.365685	0.346071	-0.175801	-0.0571035	-0.0233494	0.498274	0.286336	0.240966	1
Sample size Isochrysidales + indet	-0.464387	0.287755	-0.146809	-0.0108898	-0.201331	0.881783	0.359109	-0.56327	-0.494353	-0.222889	0.567602	-0.525052	-0.384371	-0.203939	0.570664	-0.602373	-0.393314	0.0149238	0.483424	-0.454143	-0.348082	0.298389	-0.157708	-0.0368221	0.0580506	0.280439	0.546829	0.0125605	-0.0542715	0.23942	0.0712557	1
Sample size Coccolithaceae + indet	-0.374558	0.500996	0.0288583	0.276513	-0.635972	0.35718	0.819478	-0.12429	0.00282626	-0.487396	0.559745	-0.101415	0.0983102	-0.41416	0.441224	-0.206644	0.211235	-0.238393	0.363855	-0.233909	0.0549764	-0.0204562	-0.340543	-0.134842	0.232106	0.205987	0.645922	-0.245767	-0.0963262	0.182605	-0.0114159	0.556516	1
Isochrysidales + indet length median	0.254286	-0.0892058	0.518852	-0.240182	-0.124338	-0.591989	-0.253655	0.978329	0.407116	0.512174	-0.149191	0.953615	0.40575	0.385069	-0.210309	0.905231	0.443855	0.166302	-0.11872	0.547829	0.550575	-0.236442	-0.00498228	-0.243222	-0.47569	-0.349168	-0.332038	-0.260261	0.135034	-0.451837	-0.192794	-0.607263	-0.226366	1
Isochrysidales + indet length stdev	0.374682	-0.170553	0.263808	0.0983322	0.09067	-0.636179	-0.395654	0.600477	0.934411	0.212047	-0.045101	0.538799	0.81551	0.192801	-0.152555	0.523344	0.694831	-0.0552575	-0.122999	0.248145	0.20112	-0.284923	-0.103886	-0.220186	0.218768	-0.244922	-0.132564	-0.368225	-0.253179	-0.364474	-0.425912	-0.671198	-0.20291	0.600184	1
Coccolithaceae + indet length median (μm)	-0.0981152	-0.118549	0.478018	-0.547543	0.0616913	-0.340494	-0.0305994	0.515181	-0.179798	0.62026	-0.0203376	0.516333	0.0761482	0.539797	0.171405	0.507108	0.139324	0.476981	0.171083	0.304146	0.405456	0.0835334	0.186402	-0.130651	-0.325159	-0.164513	-0.22103	-0.142431	0.493662	-0.349555	-0.148318	-0.251332	-0.284972	0.515182	-0.0522761	1
Coccolithaceae + indet length stdev (μm)	-0.345297	-0.145252	0.242476	-0.436556	0.0579841	0.351033	0.0167535	-0.0100174	0.0201811	0.344827	0.785719	-0.027582	0.1818	0.334556	0.770693	-0.170404	0.0764206	0.307472	0.714001	-0.31163	-0.152642	0.270792	-0.0285868	-0.389382	0.0890082	0.0792104	0.435802	-0.406344	-0.195342	-0.121479	-0.0673219	0.425956	0.127588	-0.0618429	-0.0817771	0.199119	1
Isochrysidales + indet width median (μm)	0.230889	-0.0275191	0.561167	-0.250529	-0.198515	-0.557286	-0.195568	0.982314	0.36822	0.542351	-0.104539	0.969978	0.378195	0.427815	-0.163938	0.910043	0.443644	0.232883	-0.0483352	0.546186	0.561602	-0.159376	-0.0175346	-0.232594	-0.506437	-0.289265	-0.276649	-0.280447	0.167396	-0.418231	-0.23916	-0.535241	-0.159342	0.989167	0.551452	0.539162	-0.0524077	1
Isochrysidales + indet width stdev (μm)	-0.0255693	-0.159649	0.224804	-0.141445	0.0250669	-0.591496	-0.305709	0.57834	0.756839	0.187305	-0.000117413	0.519234	0.900167	0.147335	-0.0415605	0.504096	0.808669	-0.173926	-0.151276	0.274301	0.395147	-0.467564	-0.153828	-0.227449	0.318894	-0.430133	-0.149955	-0.374608	-0.14543	-0.588897	-0.302693	-0.601324	-0.151072	0.575564	0.864773	0.168207	0.0203215	0.526419	1
Coccolithaceae + indet width median (μm)	-0.209218	0.0416175	0.412169	-0.558364	0.0258716	-0.335295	0.0587694	0.484234	-0.219385	0.541188	-0.00725777	0.490715	0.0595131	0.527636	0.138036	0.506649	0.172432	0.533319	0.188569	0.405739	0.512706	0.176557	0.156234	-0.0336422	-0.261655	-0.00726867	-0.152685	-0.0556693	0.592731	-0.228285	-0.160859	-0.203354	-0.192881	0.467347	-0.0778772	0.956632	0.115999	0.505385	0.163499	1
Coccolithaceae + indet width stdev (μm)	-0.353018	-0.0405596	0.33693	-0.468316	0.11758	0.318111	0.0421585	-0.103029	-0.0393955	0.380907	0.698822	-0.117408	0.139844	0.386902	0.81936	-0.22374	0.044622	0.38629	0.750162	-0.300771	-0.106675	0.362391	0.0840277	-0.307965	0.202522	0.128882	0.438436	-0.358874	0.0102798	-0.118252	-0.156861	0.414102	0.0592158	-0.142083	-0.130567	0.298839	0.92959	-0.119436	-0.0024162	0.235702	1
Isochrysidales + indet volume median (μm3)	0.398827	-0.0956261	0.345813	-0.287013	0.039953	-0.492164	-0.363147	0.809321	0.274937	0.379629	-0.356466	0.755985	0.201944	0.282598	-0.37029	0.833689	0.260703	0.157209	-0.277147	0.645735	0.457771	-0.134007	-0.0876879	0.0107284	-0.433648	-0.176661	-0.416787	0.113711	0.328339	-0.25891	-0.128873	-0.593964	-0.382911	0.886675	0.519972	0.414202	-0.21941	0.864035	0.442146	0.384184	-0.236736	1
Isochrysidales + indet volume stdev (μm3)	-0.171635	0.197511	0.163137	-0.0102799	-0.00643967	-0.593353	-0.0929478	0.58708	0.638948	0.139012	0.0620247	0.562265	0.762935	0.208996	-0.068664	0.64468	0.947572	-0.0520249	-0.0444926	0.555856	0.61048	-0.236497	-0.0743246	0.140127	0.363314	-0.219908	-0.0513485	-0.161016	0.108167	-0.298878	-0.0966547	-0.541852	0.0220764	0.527282	0.734763	0.170606	-0.0474516	0.505627	0.867423	0.203959	-0.0652668	0.410307	1
Coccolithaceae + indet volume median (μm3)	-0.133872	0.100771	0.367142	-0.420235	0.0787112	-0.270034	0.151709	0.351704	-0.252923	0.544673	0.0597449	0.373133	-0.0627362	0.600918	0.155854	0.400641	0.0821872	0.718154	0.310653	0.349632	0.358852	0.426712	0.173586	0.0805814	-0.216249	0.245622	-0.0667184	0.00167268	0.566882	0.0424844	-0.223994	-0.11659	-0.139367	0.309763	-0.171592	0.87068	0.127815	0.361969	-0.0311141	0.937231	0.239389	0.233623	0.074642	1
Coccolithaceae + indet volume stdev (μm3)	-0.277042	0.279283	0.466947	-0.242646	0.087077	0.143621	0.252668	0.0116647	-0.0837636	0.42693	0.731122	0.036921	0.0191443	0.523072	0.784332	-0.037274	0.104901	0.672605	0.939273	-0.0766023	0.0195233	0.670179	0.216529	-0.0777784	0.0997844	0.441324	0.590953	-0.238216	0.259353	0.241236	-0.211463	0.41001	0.209893	-0.0960176	-0.224271	0.395081	0.725391	-0.0239225	-0.19986	0.407597	0.806915	-0.232733	-0.0772736	0.544887	1
Isochrysidales + indet thickness (μm) median	0.163345	0.189727	-0.262071	-0.128354	0.237905	-0.243843	-0.322669	0.303725	-0.00381076	0.0383769	-0.520699	0.279233	-0.130036	0.148746	-0.654359	0.555178	0.143368	0.134124	-0.458574	0.81432	0.436727	0.134303	-0.0539333	0.640722	-0.116886	0.18583	-0.44906	0.650109	0.475632	0.221671	0.206233	-0.423177	-0.366729	0.364318	0.259923	0.00446489	-0.461757	0.338031	0.19272	0.0898147	-0.439776	0.667689	0.371143	0.0430916	-0.394419	1
Isochrysidales + indet thickness (μm) stdev	-0.471991	0.581449	0.168585	-0.0533132	-0.100726	-0.446796	0.147581	0.573133	0.0204247	0.166348	-0.0401334	0.623076	0.177494	0.230351	-0.150236	0.699703	0.565893	0.064741	-0.00913085	0.765501	0.95551	-0.0914524	0.351085	0.256407	-0.100646	-0.202968	-0.103601	0.016571	0.513567	-0.167	0.33231	-0.320972	0.109858	0.494335	0.164797	0.400811	-0.190342	0.509333	0.371722	0.490485	-0.16918	0.344286	0.645677	0.368364	0.0230785	0.356595	1
Coccolithaceae + indet thickness (μm) median	-0.154425	0.28088	0.0992718	-0.314406	0.0651043	-0.00439854	0.292343	-0.0203064	-0.328453	0.230813	0.190509	-0.00887413	-0.217352	0.429366	0.196141	0.111532	0.00516186	0.744233	0.408361	0.306868	0.166248	0.734873	-0.0547024	0.369973	0.0512474	0.70545	0.207789	0.307902	0.589112	0.498392	-0.204507	0.171177	0.050025	-0.0826858	-0.313378	0.48074	0.102085	-0.00837079	-0.259495	0.632918	0.232893	0.00231975	-0.0407124	0.805915	0.589085	0.173958	0.14735	1
Coccolithaceae + indet thickness (μm) stdev	-0.202914	0.372424	0.191642	-0.155874	0.474765	0.0491191	-0.113168	-0.0128692	-0.36481	0.438834	0.155382	0.0521501	-0.404243	0.50896	0.269373	0.0972943	-0.213369	0.526258	0.520836	0.234337	0.231107	0.540421	0.829652	0.218088	-0.216458	0.179785	0.126012	0.0995331	0.548655	0.213116	0.306117	0.171476	-0.211568	-0.0637269	-0.362975	0.367067	0.317982	-0.0365419	-0.375402	0.342527	0.453743	-0.0806833	-0.223768	0.407182	0.61445	-0.068507	0.243555	0.294777	1
Isochrysidales + indet ks median	0.200215	0.115218	-0.402438	-0.033766	0.343536	0.25829	-0.140685	-0.394666	-0.34928	-0.194958	-0.407056	-0.419084	-0.512212	-0.0594606	-0.37176	-0.142793	-0.357373	0.139086	-0.255326	0.274447	-0.175367	0.401864	-0.124947	0.734562	0.11847	0.499851	-0.182707	0.836269	0.397556	0.578599	0.173912	0.063828	-0.277747	-0.304805	-0.241831	-0.255162	-0.280874	-0.314603	-0.360343	-0.196099	-0.168311	0.138017	-0.217552	-0.108121	-0.170685	0.664111	-0.253327	0.281964	0.0615381
Isochrysidales + indet ks stdev	-0.274879	0.214239	-0.170464	0.261916	0.211642	-0.0468364	0.153955	-0.36554	0.409412	-0.355215	0.231549	-0.409204	0.502998	-0.205284	0.243824	-0.289876	0.517312	-0.208981	0.113827	-0.0823577	-0.053219	-0.0462331	-0.174403	0.272673	0.986191	0.129687	0.310268	0.0501536	-0.0450728	0.10352	-0.140293	-0.0113787	0.202381	-0.40335	0.292249	-0.313914	0.0648961	-0.435578	0.401009	-0.242695	0.165315	-0.360563	0.480243	-0.211215	0.0596719	-0.00473414	-0.00143727	0.0537779	-0.229871
Coccolithaceae + indet ks median	0.0810244	0.417142	-0.238463	0.368388	0.108898	0.0708512	0.297919	-0.30607	-0.0631497	-0.362701	0.0356649	-0.306223	-0.226546	-0.135329	-0.133469	-0.163109	-0.0717829	0.238401	0.120758	0.176172	-0.135745	0.499263	-0.182652	0.53941	0.280147	0.769521	0.313542	0.529697	0.206705	0.831699	-0.0839686	0.177715	0.255516	-0.347583	-0.148582	-0.378262	-0.315704	-0.316059	-0.337577	-0.174728	-0.31029	-0.181356	-0.136541	0.0794823	0.080464	0.266748	-0.118851	0.520033	-0.0940878
Coccolithaceae + indet ks stdev	-0.0132521	0.336355	0.0923289	0.241036	0.067519	0.336154	0.146593	-0.29393	0.211784	-0.134364	0.67482	-0.297071	0.0240264	0.00423039	0.53715	-0.341687	0.0274306	0.199678	0.706705	-0.234979	-0.312965	0.528772	-0.0183531	0.0217435	0.317544	0.568477	0.750312	-0.0475089	-0.160134	0.535601	-0.112408	0.504712	0.378312	-0.376794	-0.00563903	-0.529426	0.46406	-0.338946	-0.24565	-0.485534	0.435269	-0.36551	-0.162112	-0.305248	0.528076	-0.230865	-0.345553	0.0825764	0.196323
Isochrysidales + indet kse median	0.211331	-0.0356912	-0.60283	0.0165718	0.389991	0.178452	-0.241921	-0.386101	-0.374445	-0.339522	-0.587291	-0.418709	-0.534032	-0.250477	-0.597959	-0.13407	-0.416264	-0.109503	-0.542957	0.290439	-0.151108	0.121431	-0.0952789	0.681189	0.0260702	0.282545	-0.371666	0.887999	0.297523	0.464292	0.383041	-0.0744101	-0.376634	-0.276039	-0.234844	-0.307051	-0.453507	-0.325385	-0.319472	-0.265455	-0.414334	0.150214	-0.228076	-0.225477	-0.476143	0.693391	-0.207526	0.073389	-0.0744369
Isochrysidales + indet kse stdev	-0.251365	0.58397	0.0387941	-0.0615592	0.272426	-0.181291	0.105163	0.0675028	-0.381864	-0.0322785	-0.184593	0.0899554	-0.27179	0.0530042	-0.0442941	0.321478	0.0815477	0.156013	0.0690248	0.619353	0.551917	0.208552	0.404321	0.579113	-0.00602805	0.156315	0.0440718	0.554369	0.944929	0.233485	0.344621	-0.0109456	-0.0442191	0.042557	-0.302414	0.422853	-0.324463	0.0748186	-0.155898	0.514014	-0.124144	0.19892	0.129135	0.476647	0.145323	0.404826	0.577291	0.479443	0.49926
Coccolithaceae + indet kse median	0.113413	0.260733	-0.431832	0.0825701	0.108413	0.238849	0.167729	-0.388522	-0.226185	-0.346644	0.112286	-0.397469	-0.414679	-0.0806046	-0.0940499	-0.191621	-0.166171	0.278802	0.159094	0.20206	-0.184336	0.670541	-0.212316	0.602189	0.150749	0.869602	0.324709	0.658813	0.243538	0.910399	0.188875	0.286837	0.143826	-0.435367	-0.28062	-0.401401	-0.0864408	-0.401873	-0.481068	-0.27931	-0.100107	-0.167469	-0.204346	-0.053399	0.137249	0.381419	-0.220071	0.495559	0.0124213
Coccolithaceae + indet kse stdev	-0.260558	0.0290796	-0.372214	-0.410256	0.0909725	-0.0707984	-0.278053	0.214875	-0.124344	-0.251242	-0.158449	0.171789	-0.0485464	-0.249508	-0.296086	0.272184	0.035019	-0.35527	-0.343526	0.46627	0.532905	-0.32266	0.0988451	-0.00873649	-0.234801	-0.209375	-0.161239	0.286414	0.24596	-0.181271	0.630771	-0.145883	-0.157377	0.249908	0.0757377	-0.0448644	-0.0940703	0.189169	0.222558	0.00500956	-0.167676	0.357728	0.188883	-0.217678	-0.41299	0.465873	0.389307	-0.27257	-0.0200578
Sum all nannoliths over placoliths	0.159149	-0.151322	0.321005	-0.0813621	0.352338	-0.789815	-0.468858	0.568498	0.55234	0.263077	-0.30211	0.516868	0.574309	0.169715	-0.212769	0.5523	0.507598	-0.143209	-0.241305	0.404818	0.468807	-0.446446	0.32483	-0.133286	0.0884579	-0.511523	-0.332968	-0.152898	0.131643	-0.505766	-0.0258495	-0.821448	-0.525659	0.609678	0.702162	0.317713	-0.154138	0.527827	0.764659	0.25979	-0.0964688	0.548819	0.623834	0.0632373	-0.236264	0.259976	0.423535	-0.307701	0.0239485
Non-overgrown/overgrown discoaster ratio	-0.140525	-0.250183	-0.304861	0.0208432	0.111912	-0.0548509	0.0561291	-0.081248	-0.159747	-0.161011	0.00667505	-0.0649837	-0.121153	-0.176513	-0.101028	-0.181069	-0.255002	-0.177875	-0.110704	-0.22064	-0.0523502	-0.261555	0.3041	-0.338891	-0.215319	-0.181799	-0.0714702	-0.181713	-0.26283	-0.0549703	0.363116	-0.0399724	0.0182695	-0.110285	-0.210723	0.00789918	0.0350143	-0.165018	-0.148983	0.0062472	-0.132424	-0.335241	-0.282247	0.0404138	-0.117526	-0.418407	0.00588753	-0.200944	0.0759167
Sedimentation rate (cm/kyr)	0.147744	-0.667674	-0.616398	-0.244879	0.109436	0.0279931	-0.129275	-0.248274	-0.145497	-0.332199	-0.106364	-0.294307	-0.104347	-0.298063	-0.227719	-0.308678	-0.311019	-0.216687	-0.313528	-0.302148	-0.386005	-0.198288	-0.191935	-0.232059	-0.129259	0.0618313	-0.114803	0.0961839	-0.347852	0.0888699	0.255211	-0.0450451	-0.135468	-0.235767	-0.159733	-0.125043	0.00514498	-0.295127	-0.128002	-0.142242	-0.181194	-0.247208	-0.317769	-0.107445	-0.30786	-0.185281	-0.396457	-0.112371	-0.310486
Significance	Is green if significant (<0.05)
	Sample Depth (m)	%CaCO3	Palaeowater depth (m)	Longitude (°)	Latitude (°)	Sample size Isochrysidales	Sample size Coccolithaceae	Isochrysidales length median (μm)	Isochrysidales length stdev (μm)	Coccolithaceae length median (μm)	Coccolithaceae length stdev (μm)	Isochrysidales width median (μm)	Isochrysidales width stdev (μm)	Coccolithaceae width median (μm)	Coccolithaceae width stdev (μm)	Isochrysidales volume median (μm3)	Isochrysidales volume stdev (μm3)	Coccolithaceae volume median (μm3)	Coccolithaceae volume stdev (μm3)	Isochrysidales thickness (μm) median	Isochrysidales thickness (μm) stdev	Coccolithaceae thickness (μm) median	Coccolithaceae thickness (μm) stdev	Isochrysidales ks median	Isochrysidales ks stdev	Coccolithaceae ks median	Coccolithaceae ks stdev	Isochrysidales kse median	Isochrysidales kse stdev	Coccolithaceae kse median	Coccolithaceae kse stdev	Sample size Isochrysidales + circular	Sample size Coccolithaceae + elliptical	Isochrysidales + circular length median	Isochrysidales + circular length stdev	Coccolithaceae + elliptical length median (μm)	Coccolithaceae + elliptical length stdev (μm)	Isochrysidales + circular width median (μm)	Isochrysidales + circular width stdev (μm)	Coccolithaceae + elliptical width median (μm)	Coccolithaceae + elliptical width stdev (μm)	Isochrysidales + circular volume median (μm3)	Isochrysidales + circular volume stdev (μm3)	Coccolithaceae + elliptical volume median (μm3)	Coccolithaceae + elliptical volume stdev (μm3)	Isochrysidales + circular thickness (μm) median	Isochrysidales + circular thickness (μm) stdev	Coccolithaceae + elliptical thickness (μm) median	Coccolithaceae + elliptical thickness (μm) stdev
Sample Depth (m)
%CaCO3	0.0669229
Palaeowater depth (m)	0.633351	0.60193
Longitude (°)	0.460031	0.167237	0.894129
Latitude (°)	0.63886	0.721543	0.436432	0.978109
Sample size Isochrysidales	0.16407	0.726202	0.230941	0.914917	0.562514
Sample size Coccolithaceae	0.216764	0.0770472	0.633658	0.429072	0.00783787	0.41522
Isochrysidales length median (μm)	0.491291	0.999051	0.0375915	0.41928	0.566293	0.0100154	0.485236
Isochrysidales length stdev (μm)	0.149873	0.648908	0.243671	0.278682	0.826279	0.0281531	0.380183	0.087135
Coccolithaceae length median (μm)	0.770415	0.596962	0.0459099	0.213735	0.492015	0.509502	0.0989134	0.0426138	0.776826
Coccolithaceae length stdev (μm)	0.12308	0.393643	0.307979	0.773822	0.586205	0.282672	0.218869	0.938767	0.505202	0.97417
Isochrysidales width median (μm)	0.622591	0.801834	0.0385224	0.507224	0.488228	0.0161551	0.54734	1.09424e-12	0.147831	0.0239194	0.903433
Isochrysidales width stdev (μm)	0.975661	0.59332	0.201098	0.952807	0.869291	0.0461822	0.643617	0.0787428	1.86978e-05	0.76425	0.243307	0.139028
Coccolithaceae width median (μm)	0.94428	0.997808	0.216497	0.176952	0.371739	0.460155	0.184961	0.0973496	0.818987	2.45875e-07	0.824055	0.0561387	0.874305
Coccolithaceae width stdev (μm)	0.183149	0.573822	0.0748073	0.619165	0.768574	0.273068	0.225957	0.632772	0.768355	0.815568	7.27581e-06	0.578111	0.299389	0.907153
Isochrysidales volume median (μm3)	0.577421	0.571234	0.186346	0.503604	0.992045	0.00734441	0.39126	1.52161e-07	0.225349	0.0621865	0.525969	1.33045e-07	0.249034	0.0654044	0.263122
Isochrysidales volume stdev (μm3)	0.507847	0.378992	0.314564	0.83494	0.765133	0.0215501	0.875516	0.0291623	0.00256334	0.783038	0.255942	0.0395397	4.47513e-05	0.573792	0.526543	0.0274778
Coccolithaceae volume median (μm3)	0.77677	0.679575	0.31468	0.212706	0.455016	0.841159	0.727867	0.409141	0.665787	0.00153514	0.534416	0.32002	0.49624	1.03335e-05	0.636195	0.280423	0.865023
Coccolithaceae volume stdev (μm3)	0.343308	0.184104	0.0739168	0.72984	0.868378	0.576983	0.347722	0.97215	0.77208	0.355002	1.74722e-05	0.930508	0.609868	0.204912	1.93067e-05	0.780055	0.474281	0.057828
Isochrysidales thickness (μm) median	0.744907	0.0939178	0.982368	0.559434	0.421614	0.0580639	0.488847	0.0196579	0.945254	0.437213	0.326129	0.0171533	0.996178	0.198602	0.0990054	0.00015312	0.117848	0.293675	0.624651
Isochrysidales thickness (μm) stdev	0.102031	0.0332709	0.47073	0.393492	0.624149	0.0766059	0.669873	0.0127063	0.958135	0.567898	0.848461	0.00841048	0.551645	0.4065	0.578607	0.00211808	0.0434292	0.741752	0.960457	0.000249484
Coccolithaceae thickness (μm) median	0.925117	0.241047	0.964953	0.545664	0.481805	0.487601	0.783254	0.559881	0.337026	0.209965	0.304993	0.679143	0.123162	0.019231	0.484741	0.927295	0.503706	3.40278e-05	0.0223427	0.486711	0.835487
Coccolithaceae thickness (μm) stdev	0.754503	0.260551	0.812862	0.69231	0.036005	0.379087	0.289277	0.880668	0.641737	0.228395	0.63913	0.676182	0.358377	0.170119	0.852994	0.584863	0.672551	0.375634	0.500277	0.348134	0.26025	0.449837
Isochrysidales ks median	0.662888	0.0709518	0.13371	0.437516	0.160239	0.95761	0.938845	0.384144	0.252547	0.672472	0.196664	0.475089	0.155675	0.729437	0.120409	0.676654	0.913126	0.49522	0.546003	0.0226967	0.518434	0.130279	0.576242
Isochrysidales ks stdev	0.345119	0.474249	0.650649	0.26279	0.43943	0.984608	0.44697	0.083678	0.154759	0.130687	0.324446	0.0524637	0.0687885	0.31399	0.225075	0.125953	0.097434	0.382855	0.55337	0.452032	0.575243	0.841801	0.504152	0.433309
Coccolithaceae ks median	0.70285	0.307185	0.454525	0.719395	0.805381	0.611134	0.294379	0.301157	0.519191	0.577144	0.345775	0.293268	0.244769	0.582795	0.676153	0.572462	0.643805	0.0272061	0.105661	0.613362	0.631106	5.64058e-05	0.67467	0.120985	0.615361
Coccolithaceae ks stdev	0.382327	0.143989	0.47225	0.725419	0.609765	0.52649	0.0810012	0.442423	0.617807	0.164213	9.4826e-05	0.390555	0.458332	0.338171	0.000387995	0.270264	0.39421	0.953177	0.000267524	0.370015	0.74364	0.299806	0.713629	0.575109	0.155008	0.0755455
Isochrysidales kse median	0.926799	0.465683	0.0593616	0.989799	0.120551	0.784026	0.71887	0.239982	0.0668528	0.173099	0.126186	0.209221	0.0363894	0.397982	0.106245	0.928386	0.309738	0.944177	0.277771	0.0717118	0.881735	0.369834	0.982553	0.000183331	0.909377	0.109495	0.684154
Isochrysidales kse stdev	0.550569	0.0433485	0.743451	0.317302	0.289742	0.441286	0.735056	0.579347	0.162783	0.846954	0.597747	0.574758	0.294784	0.523337	0.96782	0.143508	0.841364	0.222571	0.569023	0.004995	0.0232663	0.173875	0.173769	0.0359752	0.797764	0.223396	0.788897	0.0240158
Coccolithaceae kse median	0.639805	0.169845	0.228827	0.407805	0.511568	0.63139	0.2842	0.136346	0.322787	0.200455	0.725564	0.150814	0.0601321	0.8015	0.813395	0.44822	0.4114	0.237455	0.335704	0.517548	0.538878	0.00302536	0.918235	0.0138164	0.661242	7.00863e-06	0.140029	0.00991297	0.246296
Coccolithaceae kse stdev	0.174446	0.451639	0.042067	0.852785	0.486218	0.71889	0.930874	0.519934	0.0603806	0.135842	0.696928	0.574283	0.0779615	0.223914	0.397224	0.96631	0.521556	0.194141	0.499468	0.226727	0.228913	0.68654	0.163652	0.189178	0.514876	0.833624	0.9316	0.0494874	0.282307	0.368638
Sample size Isochrysidales + indet	0.0699613	0.279821	0.587435	0.968072	0.454638	6.29563e-06	0.171939	0.0230867	0.0515947	0.406681	0.0218275	0.0367638	0.141579	0.448691	0.0209697	0.0135353	0.131771	0.956254	0.0578202	0.0772133	0.186448	0.261629	0.559672	0.892307	0.830901	0.292771	0.0283811	0.963176	0.841776	0.371812	0.79314
Sample size Coccolithaceae + indet	0.152901	0.0480623	0.91551	0.299865	0.00809299	0.17442	0.000102432	0.646508	0.991712	0.0554973	0.024152	0.708612	0.717187	0.110746	0.0871157	0.442563	0.432265	0.373929	0.16593	0.383248	0.839745	0.94006	0.196819	0.618554	0.387031	0.444048	0.00687174	0.358877	0.722682	0.498473	0.96653	0.0251606
Isochrysidales + indet length median	0.341915	0.742508	0.0394608	0.370246	0.64638	0.0156958	0.343157	5.68411e-11	0.117567	0.0425295	0.581319	1.09551e-08	0.118924	0.140796	0.43433	1.42841e-06	0.0850292	0.538185	0.66145	0.0280347	0.0271004	0.377967	0.98539	0.364033	0.0625486	0.184985	0.208958	0.330298	0.618049	0.0789187	0.474376	0.0126022	0.399206
Isochrysidales + indet length stdev	0.152754	0.527695	0.323509	0.717126	0.738418	0.00806596	0.129284	0.0139112	1.17587e-07	0.430454	0.868272	0.0312814	0.000117942	0.47436	0.572726	0.0374922	0.00281345	0.838936	0.64996	0.354096	0.455119	0.284793	0.701814	0.412542	0.415635	0.360584	0.62455	0.160525	0.344095	0.165157	0.0999908	0.0044178	0.451031	0.01397
Coccolithaceae + indet length median (μm)	0.717726	0.661911	0.0610968	0.0281335	0.820452	0.196887	0.910431	0.0411264	0.505209	0.0103656	0.940407	0.040598	0.779254	0.0309091	0.525606	0.0449745	0.606825	0.0617405	0.526394	0.252088	0.119217	0.758412	0.489426	0.629601	0.219121	0.542628	0.410707	0.598747	0.051973	0.184465	0.583558	0.347745	0.284707	0.0411259	0.847529
Coccolithaceae + indet length stdev (μm)	0.190237	0.591448	0.365552	0.0909077	0.831092	0.18249	0.950896	0.970629	0.940865	0.19088	0.000308919	0.919235	0.500399	0.205315	0.000475445	0.528064	0.778483	0.246677	0.00189124	0.240014	0.572506	0.310383	0.916303	0.136024	0.74306	0.770594	0.0915308	0.118333	0.468441	0.654034	0.804348	0.0999523	0.637723	0.820018	0.763355	0.459713
Isochrysidales + indet width median (μm)	0.389596	0.919419	0.0237176	0.349339	0.461103	0.0249172	0.467918	1.38508e-11	0.16053	0.0299718	0.700018	5.44442e-10	0.148636	0.098322	0.54406	1.00489e-06	0.0851949	0.385397	0.858911	0.0286052	0.0235861	0.555472	0.948609	0.386004	0.0453063	0.277194	0.299617	0.292756	0.535479	0.106933	0.372346	0.0326365	0.555558	4.56183e-13	0.0268071	0.0311457	0.847149
Isochrysidales + indet width stdev (μm)	0.925113	0.554786	0.402555	0.601305	0.926581	0.0158046	0.249536	0.0189341	0.000688667	0.487287	0.999656	0.0392905	2.02811e-06	0.586082	0.878539	0.0464773	0.000149253	0.519441	0.575988	0.303905	0.12982	0.0678165	0.569491	0.396893	0.228647	0.0963155	0.579363	0.152842	0.590989	0.0163884	0.254475	0.0137423	0.576508	0.0196519	1.53917e-05	0.533473	0.940454	0.0361882
Coccolithaceae + indet width median (μm)	0.436775	0.878374	0.112646	0.0245793	0.92423	0.204253	0.828836	0.0573411	0.414288	0.030396	0.978718	0.0536093	0.826701	0.0356814	0.610186	0.045201	0.523089	0.0333865	0.484298	0.118935	0.0422788	0.513042	0.563393	0.901563	0.327621	0.978686	0.572397	0.83775	0.0155331	0.395113	0.551751	0.450022	0.474174	0.0679609	0.774361	6.89657e-09	0.668791	0.0458297	0.545153
Coccolithaceae + indet width stdev (μm)	0.179857	0.881445	0.201917	0.0673154	0.664521	0.229855	0.876804	0.70417	0.884826	0.145508	0.00259648	0.664987	0.605469	0.138754	0.000102869	0.404845	0.86966	0.139434	0.000816444	0.257654	0.694164	0.167769	0.757022	0.245881	0.451918	0.634287	0.0893665	0.172239	0.96986	0.66271	0.561808	0.110801	0.827554	0.599649	0.629824	0.260875	1.90692e-07	0.659521	0.992914	0.379507
Isochrysidales + indet volume median (μm3)	0.125963	0.724624	0.189531	0.28112	0.883206	0.0527997	0.166818	0.000145997	0.30274	0.146977	0.175345	0.000704031	0.453237	0.288913	0.158011	6.00605e-05	0.329448	0.560928	0.298713	0.00689323	0.0745857	0.62075	0.746754	0.968545	0.0933286	0.512789	0.108274	0.674988	0.214385	0.332904	0.634311	0.0152655	0.143226	4.74682e-06	0.0389628	0.110707	0.414232	1.59566e-05	0.0863805	0.141789	0.377357
Isochrysidales + indet volume stdev (μm3)	0.525042	0.46342	0.546055	0.969859	0.981116	0.0153976	0.732069	0.0168063	0.00771103	0.607638	0.819497	0.0233865	0.000586822	0.437271	0.80052	0.00701558	2.54006e-08	0.848253	0.870035	0.0253705	0.0120163	0.377853	0.784423	0.604733	0.166608	0.413146	0.850206	0.551357	0.690082	0.260809	0.721771	0.0301532	0.935322	0.0358281	0.00118631	0.527567	0.861467	0.0457088	1.34996e-05	0.448644	0.810218	0.114442
Coccolithaceae + indet volume median (μm3)	0.621105	0.710389	0.161853	0.10509	0.772004	0.311791	0.574883	0.181597	0.344598	0.0291386	0.826035	0.154594	0.817459	0.013823	0.564354	0.124092	0.7622	0.00172829	0.241569	0.184362	0.172267	0.0992873	0.52027	0.766725	0.421157	0.35917	0.806071	0.995095	0.0220329	0.875858	0.404296	0.667195	0.606713	0.242992	0.525146	1.14449e-05	0.63712	0.168301	0.908931	8.71128e-08	0.371876	0.383847	0.783522
Coccolithaceae + indet volume stdev (μm3)	0.298903	0.294849	0.0682293	0.365205	0.748465	0.595664	0.345101	0.965801	0.757765	0.0990957	0.00129124	0.892019	0.943898	0.0376094	0.000321908	0.890993	0.699024	0.00430531	6.94927e-08	0.777968	0.942789	0.00450061	0.420541	0.774641	0.713112	0.0870357	0.0159252	0.374294	0.332049	0.368085	0.431756	0.11473	0.435261	0.723538	0.4037	0.129889	0.00147166	0.929925	0.458008	0.117092	0.000158305	0.385713	0.776068	0.0290628
Isochrysidales + indet thickness (μm) median	0.545536	0.48157	0.326824	0.635688	0.374937	0.362771	0.222876	0.252778	0.988825	0.887786	0.0386422	0.294939	0.63123	0.58246	0.00595528	0.0255877	0.596318	0.620442	0.0740128	0.000122953	0.0907663	0.619971	0.842751	0.00749018	0.666396	0.490783	0.0810074	0.00640386	0.0625852	0.409315	0.443492	0.102426	0.162362	0.165351	0.330948	0.986907	0.0717736	0.200355	0.47455	0.740806	0.0882791	0.00470839	0.156981	0.874097	0.130592
Isochrysidales + indet thickness (μm) stdev	0.0649083	0.0181547	0.532542	0.844538	0.710514	0.0827393	0.585451	0.0202975	0.940152	0.538073	0.882682	0.00992514	0.510771	0.390732	0.578645	0.00255048	0.0223176	0.811721	0.973227	0.000547837	8.22197e-09	0.736235	0.18242	0.337766	0.710732	0.4509	0.702596	0.95143	0.0418752	0.536457	0.208562	0.225458	0.685465	0.0516046	0.541922	0.123917	0.480122	0.0438883	0.156284	0.0537383	0.531075	0.191623	0.00689988	0.160355	0.932392	0.175179
Coccolithaceae + indet thickness (μm) median	0.567975	0.291981	0.714528	0.235629	0.810682	0.987101	0.271881	0.940498	0.214215	0.389756	0.479731	0.97398	0.418735	0.0969764	0.466588	0.680906	0.984863	0.000945607	0.116341	0.247653	0.53832	0.00118326	0.840535	0.158395	0.850497	0.00226619	0.439984	0.245983	0.0163396	0.049425	0.447401	0.526163	0.854027	0.760796	0.237246	0.0594302	0.706767	0.975455	0.331775	0.00850039	0.385378	0.993197	0.881001	0.000163671	0.0163456	0.519361	0.586046
Coccolithaceae + indet thickness (μm) stdev	0.451024	0.155442	0.477073	0.564303	0.0631331	0.856645	0.676461	0.962272	0.164738	0.0890427	0.565549	0.847892	0.120432	0.0440689	0.313023	0.719999	0.427519	0.0362554	0.0385821	0.382354	0.389134	0.0306782	7.02367e-05	0.417122	0.420696	0.505241	0.641916	0.713806	0.0277509	0.428079	0.248872	0.525431	0.43152	0.814622	0.167034	0.161945	0.230055	0.893122	0.151904	0.194054	0.0775075	0.766437	0.404784	0.117502	0.011323	0.800968	0.363356	0.267725
Isochrysidales + indet ks median	0.457194	0.670904	0.122256	0.901203	0.192657	0.334104	0.60328	0.13033	0.184834	0.469333	0.117627	0.106146	0.0425119	0.826851	0.156238	0.597808	0.174172	0.607446	0.339878	0.303638	0.515931	0.12284	0.644756	0.00119192	0.662122	0.0486582	0.498227	5.42252e-05	0.127286	0.0188683	0.519474	0.814333	0.297624	0.251011	0.366867	0.340198	0.291992	0.23532	0.170362	0.466685	0.533218	0.610236	0.418296	0.690207	0.527372	0.00502038	0.343802	0.290043	0.820891
Isochrysidales + indet ks stdev	0.302848	0.425592	0.527914	0.32712	0.431357	0.863247	0.569168	0.163832	0.115313	0.176973	0.388203	0.115516	0.0470342	0.44564	0.362809	0.276134	0.040153	0.437306	0.674674	0.76172	0.844809	0.864994	0.518277	0.306901	2.47599e-12	0.632154	0.242184	0.853656	0.868354	0.702818	0.6043	0.966639	0.452239	0.121332	0.272042	0.236402	0.811278	0.0917167	0.123713	0.365106	0.540635	0.170082	0.0597324	0.432307	0.826245	0.986117	0.995785	0.843198	0.391747
Coccolithaceae + indet ks median	0.765476	0.107944	0.373785	0.160324	0.688085	0.794291	0.262416	0.24895	0.816274	0.167378	0.895674	0.248701	0.398822	0.617276	0.622166	0.546126	0.791641	0.373911	0.655968	0.513976	0.616186	0.0489659	0.498359	0.031053	0.293296	0.000491045	0.236988	0.0348358	0.442427	6.49105e-05	0.757188	0.510236	0.339506	0.187123	0.582882	0.148558	0.233596	0.233043	0.200998	0.517486	0.242149	0.501465	0.614097	0.769826	0.767056	0.317944	0.661096	0.0389358	0.728897
Coccolithaceae + indet ks stdev	0.96115	0.202737	0.733793	0.368494	0.803786	0.203025	0.587991	0.269166	0.43104	0.61981	0.00413301	0.263842	0.929621	0.987594	0.0319038	0.195221	0.919678	0.458427	0.0022077	0.381014	0.237899	0.0352137	0.946214	0.936295	0.230733	0.0215797	0.000813361	0.861301	0.553569	0.0324973	0.678525	0.0461669	0.148501	0.150269	0.983464	0.0349461	0.0701847	0.199061	0.359112	0.0565773	0.0919731	0.163868	0.548615	0.250287	0.0354998	0.389645	0.189886	0.761104	0.466167
Isochrysidales + indet kse median	0.43205	0.895598	0.0134458	0.951428	0.135359	0.508456	0.366685	0.139644	0.153035	0.19825	0.0167576	0.106491	0.0331067	0.349443	0.0144233	0.620584	0.108763	0.686434	0.0297526	0.275161	0.576417	0.654163	0.725588	0.00366821	0.92365	0.289008	0.156352	4.38794e-06	0.263081	0.0700259	0.143079	0.78418	0.150457	0.300728	0.381294	0.247358	0.0776809	0.218783	0.227758	0.320385	0.110581	0.578701	0.395558	0.401111	0.0622644	0.0028952	0.440576	0.787078	0.784104
Isochrysidales + indet kse stdev	0.347679	0.0175411	0.886574	0.820831	0.307356	0.50162	0.698306	0.803832	0.144416	0.905536	0.493725	0.740413	0.308532	0.845429	0.870611	0.224686	0.764001	0.563952	0.799492	0.0105107	0.0266525	0.438267	0.120354	0.0187378	0.982323	0.563187	0.871255	0.0258488	3.5587e-08	0.384136	0.191164	0.967908	0.870828	0.875647	0.254936	0.102716	0.220166	0.783022	0.564243	0.041667	0.646898	0.46017	0.633615	0.0619491	0.591265	0.119847	0.0192028	0.0602205	0.0489678
Coccolithaceae + indet kse median	0.675797	0.32939	0.0948629	0.761122	0.689409	0.372987	0.534655	0.136966	0.399594	0.188399	0.678856	0.127377	0.110255	0.766659	0.729003	0.477121	0.53851	0.295716	0.556182	0.452972	0.494338	0.00447105	0.429856	0.0135714	0.577334	1.20938e-05	0.219797	0.00551245	0.363391	9.78389e-07	0.483576	0.281428	0.595134	0.0918921	0.292447	0.123313	0.750248	0.122831	0.059232	0.2948	0.712222	0.535298	0.447766	0.84429	0.612245	0.144923	0.412793	0.0509398	0.963584
Coccolithaceae + indet kse stdev	0.329727	0.914865	0.155694	0.114491	0.737574	0.794441	0.29707	0.424185	0.646366	0.347924	0.557803	0.524663	0.858301	0.351372	0.265506	0.307804	0.897554	0.176902	0.192672	0.0686839	0.0335499	0.222891	0.715707	0.974383	0.381384	0.436422	0.550799	0.282169	0.358487	0.501668	0.00879645	0.589822	0.560505	0.350575	0.780417	0.868958	0.728946	0.482883	0.407397	0.98531	0.534785	0.173712	0.483557	0.41802	0.11186	0.068952	0.136106	0.307091	0.941225
Sum all nannoliths over placoliths	0.556042	0.575871	0.225409	0.764524	0.180756	0.000273069	0.0669567	0.0215737	0.0265125	0.324903	0.255437	0.0403546	0.019983	0.529757	0.428851	0.0265257	0.0447339	0.596729	0.367943	0.119854	0.0669904	0.0830095	0.219616	0.622647	0.744599	0.0428384	0.207608	0.571854	0.62698	0.0456397	0.924295	9.539e-05	0.0365072	0.0121604	0.0024255	0.230471	0.568704	0.0356024	0.000560381	0.331205	0.722287	0.0276951	0.00980921	0.816024	0.378337	0.330848	0.102104	0.246306	0.929849
Non-overgrown/overgrown discoaster ratio	0.603698	0.350027	0.250918	0.938928	0.679874	0.840107	0.836427	0.764846	0.554541	0.551369	0.980426	0.811027	0.654907	0.513148	0.709681	0.502152	0.340511	0.50985	0.683161	0.411553	0.847315	0.327812	0.252165	0.19914	0.423205	0.500401	0.79253	0.500608	0.325373	0.839763	0.166856	0.88315	0.946458	0.684301	0.433406	0.976838	0.897568	0.541373	0.581854	0.981681	0.62492	0.204331	0.289539	0.881868	0.664667	0.106771	0.982735	0.455524	0.77991
Sedimentation rate (cm/kyr)	0.585031	0.00470972	0.0109946	0.360671	0.686615	0.918035	0.633244	0.353837	0.590817	0.208724	0.695015	0.268524	0.700547	0.262175	0.396317	0.244732	0.240986	0.420194	0.23701	0.255374	0.139751	0.461627	0.476387	0.387129	0.633286	0.820051	0.672029	0.723077	0.18676	0.743447	0.340103	0.868434	0.616911	0.379372	0.554575	0.6445	0.984913	0.26713	0.636621	0.599235	0.501852	0.355976	0.230385	0.692057	0.24605	0.492088	0.128438	0.678626	0.241836
[truncated: 11 more columns]

## Sheet: Discoaster
Core sample	Core section	Depth interval (cm)	Age (Ma)	Sample Depth (m)	%CaCO3	Palaeowater depth (m)	Longitude (°)	Latitude (°)	Sample size Discoaster multiradiatus	Sample size non-overgrown Discoaster multiradiatus	Sample size Discoaster lodoensis	Sample size non-overgrown Discoaster lodoensis	Sample size Sphenolithus	Discoaster multiradiatus length median (μm)	Discoaster multiradiatus length stdev (μm)	Discoaster lodoensis length median (μm)	Discoaster lodoensis length stdev (μm)	Discoaster multiradiatus volume median (μm3)	Discoaster multiradiatus volume stdev (μm3)	Discoaster lodoensis volume median (μm3)	Discoaster lodoensis volume stdev (μm3)	Discoaster multiradiatus ks median	Discoaster multiradiatus ks stdev	Discoaster lodoensis ks median	Discoaster lodoensis ks stdev	Sum all nannoliths over placoliths	Non-overgrown/overgrown discoaster ratio	Sedimentation rate (cm/kyr)
277	41R-2W	25-27	51.2439	417.25	85.01	2200	166.191	-52.2238	27	8	0	0	5	6.2	1.65605			11.65	8.26467			0.0517876	0.0135488			0.275862	0.296296	1.9
356	16R-1W	79-80	51.6514	285	14.6651	2200	-41.088	-28.287	26	2	0	14	6	13.08	2.63121			28.935	32.9431			0.0144019	0.00783983			0.64	0.615385	6
401	12R-1W	112-113	52.0878	179.5	68.1687	2000	-8.81033	47.4275	50	1	11	2	8	7.295	2.47074	11.22	3.77225	18.205	30.289	33.43	34.5561	0.0422697	0.0182174	0.0190037	0.0125659	0.734694	0.0491803	0.5
527	19R-4W	10-11	51.6454	161	100	2700	1.76333	-28.0415	47	3	3	5	12	6.47	2.09616	10.94	2.15709	12.97	10.0524	35.57	14.0569	0.0511059	0.0239754	0.0300993	0.00900881	0.27027	0.16	1.1
577	8H-6W	80-82	50.7516	63.8	100	2400	157.723	32.4418	19	5	21	29	10	9.68	3.7911	14.37	2.7008	31.54	28.3744	57.19	30.3702	0.0347954	0.018622	0.0204037	0.00812109	0.792453	0.85	0.29
690B	15H-4W	70-72	51.4232	128.1	96.8613	1900	1.2049	-65.1605	9	2	0	1	1	9.66	4.7283			37.05	32.0287			0.0411014	0.0177885			0.0481481	0.333333	0.27
762C	19X-4W	46-47	50.3666	331.5	69.5336	1200	112.254	-19.887	38	1	6	0	1	6.465	2.54242	14.645	1.61996	12.085	22.4146	78.865	26.3832	0.0422254	0.0128028	0.0221747	0.00866071	0.393162	0.0227273	2
865B	9H-4W	110-112	50.7102	75	95.5596	1400	-179.556	18.4403	17	1	12	2	8	6.54	2.83997	13.495	6.25654	15.97	15.3296	54.13	95.546	0.0470883	0.0181808	0.0160504	0.0126956	0.816327	0.103448	0.4
883B	82X-6W	125-127	50.5661	779.2	78.4966	2000	167.769	51.1985	16	1	3	3	4	6.08	1.56695	11.69	1.98525	9.57	9.79967	25.97	33.244	0.0438716	0.0152994	0.0162566	0.00556987	0.54	0.210526	0.9
929E	26R-2W	50-51	52.928	712.2	16.2377	3500	-43.74	5.9761	23	2	3	0	0	9.15	2.85722	11.84	4.91017	29.27	31.6312	23.86	62.0445	0.0382607	0.0191217	0.0261443	0.0092123	0.848485	0.0769231	1.3
1051A	45X-7W	24-25	52.635	418.7	54.5141	1500	-76.3576	30.0529	19	0	1	1	7	8.14	3.26283	18.87		14.68	29.4045	176.44		0.0321172	0.0288088	0.0262592		0.175	0.05	1.8
1209A_20H	20H-7W	20-22	52.9851	179.2	95.8202	1900	158.506	32.6517	46	3	0	16	22	9.45	3.16463			22.33	32.9341			0.0274378	0.0172744			0.418269	0.413043	0.35
1209A_21H	21H-2W	40-42	53.4121	188.7	86.2411	1900	158.506	32.6517	17	0	4	4	11	10.02	3.1459	12.02	1.99132	23.44	39.1408	37.49	17.6158	0.0291881	0.00884835	0.021181	0.00152263	0.246575	0.190476	0.35
1257A	10X-3W	90-91	51.3966	73.3	61.7809	2000	-54.342	9.4538	27	2	0	0	1	12.57	3.08257			65.64	61.6706			0.0327037	0.0132719			0.153061	0.0740741	1.1
1331C	17-3W	82-84	50.6633	177	81.8697	3000	-142.162	12.0681	23	10	0	1	13	9.55	2.398			32.26	27.1226			0.0381058	0.0124007			0.408696	0.478261	0.9
Bass River			56	349.21	13.2831	100	-74.4367	39.6117	12	10	1	5	6	11.22	3.28714	13.14		37	38.8721	95.8		0.0261953	0.00873449	0.0422259		0.259542	1.15385	17.2

## Sheet: Discoaster correl matrix
Correlation matrix	Goes from -1 (dark red) to 1 (blue)
	Sample Depth (m)	%CaCO3	Palaeowater depth (m)	Longitude (°)	Latitude (°)	Sample size Discoaster multiradiatus	Sample size non-overgrown Discoaster multiradiatus	Sample size Discoaster lodoensis	Sample size non-overgrown Discoaster lodoensis	Sample size Sphenolithus	Discoaster multiradiatus length median (μm)	Discoaster multiradiatus length stdev (μm)	Discoaster lodoensis length median (μm)	Discoaster lodoensis length stdev (μm)	Discoaster multiradiatus volume median (μm3)	Discoaster multiradiatus volume stdev (μm3)	Discoaster lodoensis volume median (μm3)	Discoaster lodoensis volume stdev (μm3)	Discoaster multiradiatus ks median	Discoaster multiradiatus ks stdev	Discoaster lodoensis ks median	Discoaster lodoensis ks stdev	Sum all nannoliths over placoliths	Non-overgrown/overgrown discoaster ratio	Sedimentation rate (cm/kyr)
Sample Depth (m)	1
%CaCO3	-0.468909	1
Palaeowater depth (m)	0.129235	0.141204	1
Longitude (°)	0.19898	0.362813	0.0361957	1
Latitude (°)	0.12716	-0.096737	-0.20937	0.00746536	1
Sample size Discoaster multiradiatus	-0.184263	0.172122	0.212016	0.176921	0.00157656	1
Sample size non-overgrown Discoaster multiradiatus	-0.0658519	-0.101308	-0.0387866	-0.122793	-0.0906389	-0.15041	1
Sample size Discoaster lodoensis	-0.29883	0.320784	0.00890185	0.130539	0.350685	0.0426158	-0.154097	1
Sample size non-overgrown Discoaster lodoensis	-0.307268	0.149758	0.0667132	0.365835	0.211722	0.0586733	0.102395	0.516593	1
Sample size Sphenolithus	-0.387459	0.426407	0.0674115	0.161975	0.342435	0.398492	0.18579	0.0751262	0.48454	1
Discoaster multiradiatus length median (μm)	-0.284605	-0.490952	-0.0379264	-0.238999	0.0206601	-0.27064	0.15731	-0.250913	0.308453	-0.0175357	1
Discoaster multiradiatus length stdev (μm)	-0.457831	0.0391085	-0.211978	-0.144352	-0.0784687	-0.397621	-0.109395	0.143006	0.284345	-0.0447827	0.49779	1
Discoaster lodoensis length median (μm)	-0.0438492	-0.0962007	-0.361281	-0.197109	0.0405178	-0.331097	-0.100617	-0.00735265	0.0777309	-0.101383	0.0960439	0.511351	1
Discoaster lodoensis length stdev (μm)	-0.0868278	-0.277267	0.142424	-0.879062	0.116961	-0.196469	-0.0548079	0.242835	-0.176628	-0.128434	0.00603514	0.221508	0.00323299	1
Discoaster multiradiatus volume median (μm3)	-0.370344	-0.25951	0.0202222	-0.316537	-0.0217819	-0.268081	0.203274	-0.164879	0.0666698	-0.223316	0.816395	0.511273	-0.0598339	0.262564	1
Discoaster multiradiatus volume stdev (μm3)	-0.327481	-0.370918	-0.14282	-0.217424	0.209515	-0.125899	-0.0660252	-0.170489	0.0535238	-0.110204	0.833128	0.552099	0.182846	0.0305078	0.86049	1
Discoaster lodoensis volume median (μm3)	-0.0422533	-0.258218	-0.534245	-0.330415	0.0600103	-0.260992	0.0825095	-0.244694	-0.072475	-0.0245167	0.183203	0.450739	0.924775	-0.150697	-0.00406248	0.261749	1
Discoaster lodoensis volume stdev (μm3)	0.0381025	-0.229711	-0.0599159	-0.782792	0.110474	-0.389642	-0.138455	0.206035	-0.211591	-0.292626	-0.134952	0.136141	0.211116	0.932527	0.102243	-0.124079	0.0160019	1
Discoaster multiradiatus ks median	0.086838	0.559562	0.214646	0.0790212	-0.254157	0.179877	0.0126576	0.20678	-0.423514	-0.171556	-0.847123	-0.377826	-0.378251	0.1994	-0.437392	-0.658688	-0.454535	0.227311	1
Discoaster multiradiatus ks stdev	0.0410466	0.301151	0.227686	-0.137143	0.0470447	0.206006	-0.342424	0.201902	-0.0279961	0.0982338	-0.46931	0.106441	0.410907	0.346226	-0.314368	-0.294665	0.360733	0.185306	0.417826	1
Discoaster lodoensis ks median	0.0563079	-0.63098	-0.358751	-0.311467	-0.165759	-0.0939586	0.764067	-0.501453	-0.0656977	-0.0127836	0.573969	0.276258	0.0645326	-0.231191	0.546618	0.403794	0.357467	-0.40506	-0.455853	-0.12316	1
Discoaster lodoensis ks stdev	-0.243294	-0.0978563	-0.0314999	-0.768594	-0.162562	0.457595	0.190955	0.368127	-0.102414	-0.134292	-0.446517	-0.0465446	0.0843418	0.656508	-0.100502	-0.287033	0.166978	0.569322	0.627577	0.651171	-0.0597245	1
Sum all nannoliths over placoliths	0.159149	-0.151322	0.321005	-0.0813621	0.352338	0.138902	-0.124248	0.643585	0.362885	0.0498075	-0.146958	-0.216267	-0.301539	0.764856	-0.234195	-0.241435	-0.53267	0.727628	0.0193442	0.029346	-0.52138	0.625302	1
Non-overgrown/overgrown discoaster ratio	-0.140525	-0.250183	-0.304861	0.0208432	0.111912	-0.343608	0.692132	0.0859446	0.590495	0.228396	0.487507	0.280754	0.0120894	-0.190525	0.279712	0.142695	0.121291	-0.195131	-0.480686	-0.423333	0.584534	-0.199782	0.0190062	1
Sedimentation rate (cm/kyr)	0.147744	-0.667674	-0.616398	-0.244879	0.109436	-0.265186	0.512193	-0.238419	0.0194144	-0.129439	0.384682	0.0591138	0.044664	-0.297361	0.200647	0.204152	0.316799	-0.169431	-0.435521	-0.430865	0.848943	0.0581255	-0.148618	0.702201	1
Significance	Is green if significant (<0.05)
	Sample Depth (m)	%CaCO3	Palaeowater depth (m)	Longitude (°)	Latitude (°)	Sample size Discoaster multiradiatus	Sample size non-overgrown Discoaster multiradiatus	Sample size Discoaster lodoensis	Sample size non-overgrown Discoaster lodoensis	Sample size Sphenolithus	Discoaster multiradiatus length median (μm)	Discoaster multiradiatus length stdev (μm)	Discoaster lodoensis length median (μm)	Discoaster lodoensis length stdev (μm)	Discoaster multiradiatus volume median (μm3)	Discoaster multiradiatus volume stdev (μm3)	Discoaster lodoensis volume median (μm3)	Discoaster lodoensis volume stdev (μm3)	Discoaster multiradiatus ks median	Discoaster multiradiatus ks stdev	Discoaster lodoensis ks median	Discoaster lodoensis ks stdev	Sum all nannoliths over placoliths	Non-overgrown/overgrown discoaster ratio	Sedimentation rate (cm/kyr)
Sample Depth (m)
%CaCO3	0.0669229
Palaeowater depth (m)	0.633351	0.60193
Longitude (°)	0.460031	0.167237	0.894129
Latitude (°)	0.63886	0.721543	0.436432	0.978109
Sample size Discoaster multiradiatus	0.494513	0.523847	0.430524	0.512158	0.995377
Sample size non-overgrown Discoaster multiradiatus	0.808546	0.708909	0.886595	0.650512	0.738505	0.578199
Sample size Discoaster lodoensis	0.26089	0.225746	0.973898	0.629899	0.182953	0.875477	0.568808
Sample size non-overgrown Discoaster lodoensis	0.247006	0.579867	0.806086	0.163466	0.431178	0.829112	0.705913	0.0404797
Sample size Sphenolithus	0.138138	0.0995548	0.804092	0.548957	0.194181	0.126311	0.490878	0.782149	0.0571606
Discoaster multiradiatus length median (μm)	0.285355	0.0534761	0.889096	0.372678	0.939463	0.310665	0.560675	0.348576	0.245094	0.948606
Discoaster multiradiatus length stdev (μm)	0.0745428	0.88566	0.430608	0.593772	0.772689	0.127218	0.686729	0.597255	0.285813	0.869195	0.0497443
Discoaster lodoensis length median (μm)	0.8719	0.72303	0.169171	0.464347	0.881566	0.21033	0.710813	0.97844	0.774775	0.708702	0.723465	0.0429199
Discoaster lodoensis length stdev (μm)	0.749164	0.298495	0.598765	7.32722e-06	0.666191	0.465828	0.840231	0.364819	0.51287	0.635475	0.982303	0.409669	0.990519
Discoaster multiradiatus volume median (μm3)	0.157946	0.331745	0.940744	0.232297	0.936183	0.315441	0.450204	0.541719	0.806209	0.405759	0.000114322	0.0429568	0.82578	0.325881
Discoaster multiradiatus volume stdev (μm3)	0.215656	0.157252	0.597738	0.418577	0.436107	0.642216	0.808051	0.527853	0.843931	0.684524	6.1396e-05	0.0265921	0.497896	0.910698	1.89193e-05
Discoaster lodoensis volume median (μm3)	0.876529	0.334245	0.0330237	0.211328	0.825273	0.328893	0.761292	0.361045	0.789674	0.928188	0.497041	0.0797399	2.99087e-07	0.577466	0.988087	0.327441
Discoaster lodoensis volume stdev (μm3)	0.888584	0.392086	0.825544	0.000336858	0.683787	0.13574	0.609092	0.443939	0.431471	0.271395	0.618267	0.615146	0.432529	1.42648e-07	0.706331	0.647072	0.953097
Discoaster multiradiatus ks median	0.749135	0.0242082	0.424693	0.771128	0.342169	0.505019	0.962892	0.442257	0.102123	0.525235	3.45851e-05	0.149065	0.14857	0.459066	0.09022	0.00552453	0.0769268	0.397187
Discoaster multiradiatus ks stdev	0.880031	0.257024	0.396388	0.612522	0.862644	0.444004	0.194197	0.453331	0.918027	0.717398	0.066658	0.694802	0.113861	0.188967	0.235689	0.267915	0.169866	0.492029	0.107308
Discoaster lodoensis ks median	0.835913	0.00876736	0.172397	0.240272	0.539532	0.729257	0.00056934	0.0478262	0.808986	0.962523	0.0200736	0.30033	0.812317	0.388957	0.0284545	0.120884	0.17405	0.119613	0.0759669	0.649531
Discoaster lodoensis ks stdev	0.363886	0.718443	0.907806	0.000503699	0.547491	0.0747117	0.478684	0.160644	0.705861	0.620001	0.0829549	0.864092	0.756139	0.00573816	0.711129	0.281085	0.536511	0.0213423	0.00925194	0.00628937	0.826094
Sum all nannoliths over placoliths	0.556042	0.575871	0.225409	0.764524	0.180756	0.607925	0.646621	0.00714441	0.167146	0.854656	0.587053	0.421117	0.256381	0.000557418	0.382649	0.367679	0.033643	0.00139893	0.943313	0.914087	0.0383437	0.00958748
Non-overgrown/overgrown discoaster ratio	0.603698	0.350027	0.250918	0.938928	0.679874	0.192558	0.00296826	0.75164	0.0160276	0.394877	0.0554331	0.292207	0.964557	0.479694	0.294077	0.598061	0.654538	0.468932	0.0594632	0.102285	0.0174059	0.458189	0.944302
Sedimentation rate (cm/kyr)	0.585031	0.00470972	0.0109946	0.360671	0.686615	0.320894	0.0425209	0.373874	0.943108	0.632811	0.141229	0.827847	0.869539	0.263354	0.456203	0.448207	0.23189	0.530457	0.0917636	0.0956878	3.19664e-05	0.830686	0.58279	0.00242354

## Sheet: Placolith raw data
Coccolithaceae									Isochrysidales									Coccolithaceae indet									Isochrysidales indet
Site	Max Width (μm)	Min Width (μm)	Area (μm²)	Volume (µm³)	Mass (pg)	Thickness (μm)	kse		Site	Max Width (μm)	Min Width (μm)	Area (μm²)	Volume (µm³)	Mass (pg)	Thickness (μm)	kse		Site	Max Width (μm)	Min Width (μm)	Area (μm²)	Volume (µm³)	Mass (pg)	Thickness (μm)	kse		Site	Max Width (μm)	Min Width (μm)	Area (μm²)	Volume (µm³)	Mass (pg)	Thickness (μm)	kse
277	4.81	4.06	14.94	7.64	20.63	0.511379	0.184034		277	5.53	4.22	17.38	8.95	24.16	0.51496	0.17357		277	4.79	3.23	11.61	4.9	13.22	0.42205	0.187265		277	4.88	4.04	14.78	4.13	11.14	0.279432	0.0990305
277	6.68	6.4	31.31	17.03	45.99	0.543916	0.118872		277	4.97	3.86	13.03	4.83	13.04	0.370683	0.124571		277	5.86	4.91	22.13	10.43	28.16	0.471306	0.141002		277	4.56	4.35	15.47	3.52	9.5	0.227537	0.0779113
277	7.27	5.49	29.51	13.58	36.67	0.460183	0.118365		277	3.6	3.27	8.95	3.82	10.31	0.426816	0.189525		277	5.5	4.53	19.39	9.43	25.47	0.486333	0.159571		277	5.07	4.46	18.59	4.48	12.09	0.24099	0.0848402
277	5.55	3.79	15.98	6.75	18.24	0.422403	0.161709		277	4.96	3.61	13.29	5.85	15.81	0.440181	0.172847		277	4.91	3.42	12.94	5.04	13.61	0.38949	0.167609		277	4.86	3.37	12.75	2.89	7.8	0.226667	0.100001
277	5.16	3.49	13.99	5.28	14.25	0.377412	0.160448		277	4.25	3.51	5.62	1.26	3.4	0.224199	0.0459588		277	7.07	4.12	20.93	7.22	19.49	0.344959	0.114901		277	5.14	3.7	15.02	7.55	20.38	0.502663	0.204919
277	5.83	3.43	15.11	7.21	19.47	0.477167	0.200761		277	4.99	4.22	16.41	8.39	22.65	0.511274	0.180318		277	5.16	3.45	13.66	6.42	17.34	0.469985	0.19964		277	3.74	3.23	9.3	4.28	11.54	0.460215	0.209493
277	7.63	6.88	40.21	27.57	74.45	0.68565	0.145793		277	5.24	4.44	17.8	10.3	27.81	0.578652	0.190433		277	5.38	5.09	19.85	8.61	23.25	0.433753	0.117974		277	4.72	3.8	13.9	4.96	13.38	0.356835	0.138987
277	5.76	4.07	18.31	6.33	17.1	0.345713	0.126705		277	3.63	3.18	8.88	3.96	10.7	0.445946	0.206032		277	5.52	3.52	15.44	6.41	17.31	0.415155	0.178993		277	6.25	5.36	26.15	12.8	34.56	0.489484	0.136145
277	8.01	6.39	39.67	31.47	84.97	0.793295	0.183765		277	4.86	3.09	11.33	4.94	13.33	0.436011	0.203318		277	5.99	3	13.47	5.02	13.57	0.37268	0.177843		277	6.13	3.51	10.16	2.95	7.96	0.290354	0.0746017
277	5	3.7	14.25	7.67	20.72	0.538246	0.214005		277	5.54	4.85	21.01	11.42	30.84	0.543551	0.167369		277	7.03	6.37	34.72	17.17	46.35	0.494528	0.114958		277	6.41	4.83	24.01	7.29	19.67	0.303623	0.0931058
277	5.95	4.62	20.83	11.58	31.28	0.555929	0.174144		277	4.73	3.92	14.9	6.78	18.31	0.455034	0.178155		277	4.33	3.9	13.24	6.21	16.78	0.469033	0.180084		277	5.46	3.58	14.83	5.48	14.8	0.369521	0.149563
277	4.7	4.12	14.68	8.43	22.75	0.574251	0.201807		277	5.81	4.23	19.05	5.76	15.55	0.302362	0.10582		277	5.1	4.29	17.1	7	18.9	0.409357	0.142434		277	5.42	4.24	17.69	4.34	11.72	0.245336	0.0850668
277	6.34	5.26	24.9	14.17	38.25	0.569076	0.15428		277	6.11	5.17	23.99	13.24	35.74	0.551897	0.154834		277	4.64	3.82	13.74	5.56	15	0.404658	0.156831		277	6.35	5.53	26.88	9.12	24.63	0.339286	0.0896958
277	9.92	7.71	61.05	37.88	102.28	0.620475	0.122685		277	7.18	6.46	35.89	24.03	64.88	0.669546	0.153167		277	5.13	4.32	16.18	8.09	21.83	0.5	0.161386		277	4.78	3.71	13.9	4.31	11.63	0.310072	0.125113
277	5.47	3.46	7.26	2.08	5.62	0.286501	0.0606632		277	5.38	4.77	19.85	10.28	27.77	0.517884	0.160389		277	3.76	3.26	9.21	5.29	14.27	0.574376	0.252833		277	5.05	3.87	15.5	5.6	15.13	0.36129	0.141409
277	7.61	6.13	36.36	19.43	52.46	0.534378	0.129768		277	5.09	4.63	17.41	7.34	19.82	0.421597	0.128475		277	5.32	4.39	17.45	7.09	19.14	0.406304	0.132071		356	4.18	2.99	9.69	3.01	8.14	0.31063	0.153833
277	6.28	5.54	27.02	16.95	45.75	0.627313	0.167955		277	4.17	3.64	11.85	4.71	12.72	0.397468	0.162811		277	4.92	3.36	12.66	5.33	14.4	0.421011	0.183267		356	3.97	3.65	11	3.05	8.22	0.277273	0.110135
277	5.69	4.64	20.56	10.61	28.65	0.516051	0.165413		277	6.59	4.08	19.82	7.19	19.4	0.362765	0.125177		277	4.39	4.22	14.19	6.39	17.24	0.450317	0.156104		356	10.08	7.16	50.37	18.52	50	0.367679	0.0684472
277	8.67	7.4	48.79	26.68	72.04	0.546833	0.107326		277	5.27	4.09	16.69	6.81	18.39	0.408029	0.147534		277	5.17	3.06	12.19	5.2	14.03	0.426579	0.20515		356	6.39	4.92	24.11	6.09	16.45	0.252592	0.0751948
277	6.1	4.65	21.58	12.99	35.07	0.601946	0.188094		277	5.32	4.87	20.02	12	32.41	0.599401	0.181641		277	6.86	4.08	19.18	6.98	18.85	0.363921	0.116738		356	4.74	2.76	9.72	1.95	5.26	0.200617	0.103143
277	8.81	8.51	57.87	36.35	98.16	0.628132	0.10881		277	7.42	5.65	31.53	18.43	49.75	0.584523	0.148602		277	3.79	3.75	11.04	4.62	12.46	0.418478	0.165555		356	5.1	3.71	14.6	2.85	7.71	0.195205	0.0775404
277	6.87	5.05	26.59	14.43	38.95	0.542685	0.1573		277	3.73	2.8	8.16	2.33	6.29	0.285539	0.152171		277	4.27	3.44	11.25	5.58	15.07	0.496	0.210907		356	5.85	4.91	22.11	4.73	12.78	0.21393	0.0640536
277	7.45	6.51	38.27	23.43	63.25	0.612229	0.141728		277	4.96	4.62	17.26	8.39	22.64	0.486095	0.151355		277	5.24	4.15	16.72	5.85	15.79	0.34988	0.123803		401	5.1	4.53	17.99	5.75	15.52	0.319622	0.104931
277	4.24	2.92	9.33	2.57	6.94	0.275456	0.13577		277	4.92	4.29	15.61	4.08	11.02	0.261371	0.0860561		277	5.47	3.85	16.31	8	21.61	0.490497	0.188444		401	4.57	3.97	13.95	4.2	11.34	0.301075	0.111366
277	7.81	6.11	36.65	18.49	49.94	0.504502	0.121117		277	4.92	4.27	16.25	7.15	19.32	0.44	0.152225		356	6.22	3.61	13.87	3.81	10.29	0.274694	0.089768		401	8.05	6.97	43.8	25.28	68.24	0.577169	0.123457
277	6.21	4.52	21.58	11.5	31.04	0.532901	0.173113		277	4.97	3.88	14.81	8.94	24.13	0.603646	0.228202		356	4.49	3.09	10.71	4.62	12.48	0.431373	0.205816		401	5.52	4.15	17.17	5.31	14.35	0.30926	0.106675
277	4.85	3.39	12.83	6.31	17.03	0.491816	0.216217		277	6.61	4.52	22.75	13.44	36.29	0.590769	0.190074		356	10.34	8.39	67.61	29.74	80.29	0.439876	0.0780365		401	7.68	6.22	37.02	21.61	58.36	0.583739	0.138904
277	6.05	3.96	18.27	8.6	23.23	0.470717	0.173123		277	7.04	6.73	37.17	29.24	78.94	0.786656	0.175136		356	6.21	4.14	20.04	6.53	17.64	0.325848	0.117172		401	4.83	3.51	13.17	5.73	15.46	0.43508	0.183905
277	5.26	4.39	17.43	8.23	22.22	0.472174	0.155055		277	5.85	4.63	21.01	5.71	15.42	0.271775	0.08696		356	5	4.37	17.05	6.55	17.7	0.384164	0.131012		527	5.8	4.43	10.59	3.19	8.6	0.301228	0.053525
277	5.23	3.86	15.81	7.14	19.29	0.451613	0.174994		277	5.03	3.71	13.75	7.67	20.71	0.557818	0.211583		356	3.84	3.51	10.44	1.9	5.12	0.181992	0.0767025		527	4.84	3.8	14.2	3.13	8.45	0.220423	0.0855329
277	5.21	3.78	15.15	8.58	23.17	0.566337	0.220124		277	9.88	7.49	57.59	38.9	105.03	0.675464	0.134039		356	5.22	4.65	18.98	6.51	17.58	0.342993	0.110155		527	5.06	4.07	16.08	3.46	9.34	0.215174	0.0788385
277	5.2	3.78	15.06	7.37	19.91	0.489376	0.189444		277	10.19	7.36	58.23	44.39	119.85	0.762322	0.153588		356	6.71	3.76	8.92	1.3	3.52	0.14574	0.0261726		527	5.59	4.76	20.49	5.12	13.82	0.249878	0.077205
277	4.87	4.1	15.54	10.28	27.77	0.661519	0.239827		277	5.53	4.79	20.66	11	29.71	0.53243	0.165576		356	5.44	4.29	18.18	5.6	15.12	0.308031	0.106826		527	4.98	4.65	17.88	5.36	14.48	0.299776	0.0950672
277	6.84	4.92	25.59	11.18	30.17	0.436889	0.128961		277	6.08	4.83	23.03	7.54	20.35	0.327399	0.101525		356	4.69	4.14	14.99	2.92	7.87	0.194797	0.0693762		527	6.19	5.62	26.42	15.26	41.2	0.577593	0.149071
277	8.98	7.42	51.64	38.66	104.38	0.748644	0.149341		277	4.85	3.73	14.51	3.09	8.34	0.212957	0.0874582		356	6.07	5	23.4	8.19	22.11	0.35	0.103076		527	5.7	5.14	23	6.49	17.53	0.282174	0.0823086
277	5.66	4.8	21.02	11.56	31.21	0.549952	0.169301		277	6.51	4.72	23.65	10.28	27.76	0.434672	0.135372		356	4.2	3.52	11.47	2.68	7.23	0.233653	0.0983562		527	5.24	4.46	18.07	6.6	17.82	0.365246	0.120933
277	6.27	4.25	20.72	13.75	37.12	0.66361	0.231878		277	4.99	4.04	15.73	5.23	14.11	0.332486	0.122642		356	4.64	3.31	11.75	4.2	11.33	0.357447	0.157789		527	5.41	3.59	14.9	6.31	17.05	0.42349	0.17284
277	11.79	8.35	76.53	64.9	175.22	0.848033	0.150785		277	6.64	4.72	24.29	8.46	22.85	0.348291	0.109224		356	5.41	4.86	19.63	6.81	18.38	0.346918	0.101784		527	5.52	4.66	20.16	4.68	12.64	0.232143	0.0745652
277	9.28	7.78	56.19	32.12	86.73	0.571632	0.109212		277	5.67	4.49	21.02	7.61	20.54	0.362036	0.127148		356	8.37	4.81	30.95	8.52	23.01	0.275283	0.0840283		527	5.71	4.22	11.6	3.77	10.17	0.325	0.0708079
277	6.54	4.71	23.35	10.31	27.84	0.441542	0.135719		277	5.31	3.83	15.9	7.77	20.99	0.488679	0.190516		356	4.34	3.37	11.37	4.08	11.02	0.358839	0.158093		527	6.04	5.44	25.79	6.41	17.31	0.248546	0.0684896
277	5.26	4.4	17.81	11.75	31.73	0.659742	0.220368		277	8.72	5.4	31.18	15.29	41.27	0.490378	0.114843		356	3.12	2.27	5.44	1.57	4.23	0.288603	0.186507		527	5.17	3.9	15.79	3.56	9.62	0.225459	0.0864633
277	8.6	7.13	47.02	32.77	88.47	0.696937	0.143153		277	4.95	4.13	15.65	7.1	19.17	0.453674	0.160603		401	4.52	4.02	14.01	4.86	13.12	0.346895	0.127071		527	5.85	3.69	13.15	3.47	9.36	0.263878	0.0831998
277	8.09	4.85	30.11	17	45.9	0.564596	0.170615		277	6.11	4.61	21.55	13.85	37.41	0.642691	0.203708		401	4.76	2.99	10.85	4.84	13.06	0.446083	0.217219		527	5.98	3.61	16.5	9	24.3	0.545455	0.220561
277	4.49	4.27	14.94	6.87	18.54	0.459839	0.160271		277	5.05	4.09	15.5	6.47	17.47	0.417419	0.146274		401	5.15	4.14	16.4	8.78	23.7	0.535366	0.189971		527	6.55	6	29.97	9.35	25.24	0.311979	0.0757302
277	6.54	5.13	25.85	20.67	55.81	0.799613	0.229366		356	9.51	7.46	55.35	26.52	71.6	0.479133	0.0957011		401	6.12	4.78	21.34	10.12	27.32	0.474227	0.138221		527	5.26	3.93	15.87	4.62	12.48	0.291115	0.108611
277	10.05	6.88	53.56	32.39	87.46	0.604742	0.130038		356	9.47	8.48	61.65	29.39	79.34	0.476723	0.0824251		401	6.12	4.78	21.34	9.14	24.69	0.428304	0.124836		527	7.88	7.24	44.64	17.35	46.83	0.388665	0.0802227
277	8.33	5.48	35.08	24.69	66.66	0.70382	0.188502		356	8.69	7.46	50.67	21.78	58.82	0.42984	0.0860125		401	7.15	5.02	27.96	10.84	29.26	0.387697	0.114899		527	6.11	4.51	20.73	6.15	16.61	0.296671	0.094511
277	6.6	5.52	28.14	8.37	22.6	0.297441	0.0794886		356	6.94	6	31.9	12.01	32.44	0.376489	0.0918084		401	7.15	5.02	27.96	9.62	25.97	0.344063	0.101968		527	6.14	4.75	16.67	4.6	12.42	0.275945	0.0634167
277	6.6	4.41	22.41	10.48	28.3	0.467648	0.155934		356	6.26	5.89	28.75	11.64	31.44	0.40487	0.102365		401	5.29	4.6	18.87	10.09	27.25	0.534711	0.172156		527	4.76	4.43	16.47	5.63	15.21	0.341834	0.115105
277	7.14	5	27.5	12.05	32.55	0.438182	0.128929		356	7.29	6.29	35.31	12.37	33.4	0.350326	0.081911		401	11.43	7.97	70.66	27.66	74.69	0.391452	0.0727597		527	5.98	4.05	9.62	2.87	7.76	0.298337	0.055882
277	4.7	3.65	12.94	6.53	17.63	0.504637	0.199173		356	5.43	4.67	19.66	5.68	15.32	0.288911	0.0916044		401	4.52	3.44	10.76	3.1	8.37	0.288104	0.11069		527	6.08	3.89	8.57	2.07	5.59	0.24154	0.0429704
277	5.93	5.28	24.29	12.44	33.6	0.512145	0.143714		356	7.06	6.5	35.66	18.82	50.83	0.527762	0.120501		401	4.95	4.58	17.21	11.08	29.92	0.643812	0.2038		527	5.46	5.02	21.19	6.14	16.59	0.289759	0.0852255
277	7.65	4.8	28.21	17.25	46.58	0.611485	0.186916		356	5.6	4.05	17.52	4.9	13.23	0.27968	0.101882		401	3.61	2.97	8.57	2.89	7.8	0.337223	0.173332		527	6.05	5.53	25.12	7.04	19.01	0.280255	0.0726722
277	7.85	6.36	38.92	27.82	75.12	0.7148	0.16733		356	4.23	3.35	11.02	2.45	6.6	0.222323	0.0985683		401	4.21	3.6	11.42	4.58	12.36	0.401051	0.160317		527	5.71	5.01	21.5	5.5	14.85	0.255814	0.0732913
277	6.25	5.9	28.66	16.9	45.64	0.589672	0.148356		356	6.14	5.19	24.24	7.92	21.37	0.326733	0.0914584		401	5.76	4.81	20.9	13.16	35.52	0.629665	0.188601		527	4.37	2.67	5.65	1.55	4.19	0.274336	0.0950231
277	5.41	3.53	14.68	6.44	17.4	0.438692	0.182449		356	6.82	6.13	32.13	16	43.19	0.497977	0.119238		401	4.8	3.65	13.34	4.95	13.37	0.371064	0.147836		527	13.35	5.74	48.12	14.28	38.56	0.296758	0.0620047
277	8.87	6.68	45.88	28.48	76.9	0.62075	0.137425		356	4.71	3.46	12.46	3.26	8.8	0.261637	0.11042		401	4.8	3.65	13.34	5.53	14.94	0.414543	0.165158		527	5.37	4.65	13.27	5.12	13.83	0.385833	0.0842153
277	9.34	7.43	54.02	32.47	87.68	0.601074	0.120271		356	3.92	3.69	11.32	2.82	7.61	0.249117	0.100905		401	6.2	5.32	25.45	14.46	39.04	0.568173	0.157382		527	6.31	4.65	10.03	2.63	7.1	0.262213	0.0368148
277	5.66	4.56	19.8	6.47	17.47	0.326768	0.104993		356	11.03	10.39	89.78	54.86	148.13	0.611049	0.0879935		401	4.24	3.32	10.59	4.09	11.06	0.386213	0.167141		527	5.83	3.8	11.57	2.74	7.39	0.236819	0.0621607
277	12.6	9.74	96.69	73.17	197.57	0.756748	0.116908		356	9.07	8.65	60.75	33.82	91.31	0.556708	0.0951778		401	6.47	4.53	22.3	9.48	25.6	0.425112	0.136367		527	5.76	4.62	20.75	4.46	12.04	0.21494	0.0692835
277	7.17	5.06	27.71	17.71	47.83	0.639119	0.184247		356	5.33	4.5	18.64	4.92	13.28	0.263948	0.0870591		401	3.56	2.73	7.51	3.28	8.85	0.436751	0.236102		527	7.28	6.87	39	15.49	41.82	0.397179	0.0861009
277	7.49	6.46	37.64	26.91	72.65	0.714931	0.164425		356	5.89	5.39	24.2	5.87	15.86	0.242562	0.0655159		401	5.66	4.53	20.03	7.02	18.94	0.350474	0.115432		527	5.26	4.16	16.99	3.29	8.89	0.193643	0.0690279
356	7.96	6.78	41.88	18.67	50.4	0.445798	0.0974481		356	7.81	6.72	40.24	17.18	46.39	0.426938	0.0930326		401	4.87	3	10.45	4.92	13.28	0.470813	0.214385		527	5.27	4.23	15.49	5.34	14.42	0.344739	0.108156
356	6.34	5.44	26.12	4.77	12.87	0.182619	0.0485549		356	8.87	7.37	50.96	23.78	64.21	0.466641	0.0942659		401	5.72	4.17	17.89	7.57	20.44	0.423141	0.145355		527	5.83	5.21	23.85	7.37	19.9	0.309015	0.0889457
356	5.3	4.85	19.37	3.14	8.48	0.162106	0.0481029		356	6.25	4.97	23.69	7.41	20	0.31279	0.0916699		527	5.04	4.28	16.43	7.94	21.44	0.483262	0.164249		527	5.25	4.05	15.54	5.69	15.36	0.366152	0.126196
356	9.24	8	55.98	26.68	72.03	0.476599	0.0861659		356	7.92	6	36.69	12	32.39	0.327065	0.0803813		527	5.64	4.48	19.14	11.23	30.32	0.586729	0.189472		527	5.87	5.44	24.79	6.29	16.97	0.253731	0.0691538
356	7.51	5.18	29.92	11.87	32.04	0.396725	0.1125		356	5.7	4.79	20.91	5.6	15.13	0.267814	0.0817793		527	7.6	5.83	34.2	24.58	66.38	0.718713	0.181732		527	5.37	4.65	19.46	4.72	12.73	0.242549	0.077636
356	9.68	8.34	62.81	32.21	86.96	0.512816	0.091366		356	3.21	2.6	6.38	1.64	4.42	0.257053	0.144342		527	6.09	4.14	20.45	12.36	33.37	0.604401	0.226153		527	8.05	6.37	39.18	22.86	61.72	0.583461	0.13366
356	9.54	6.41	47.3	12.51	33.78	0.264482	0.0609529		356	10.34	7.98	64.05	31.42	84.85	0.490554	0.0911342		527	6.49	5.42	27.2	16.2	43.74	0.595588	0.162283		527	10.69	6.79	55.56	10.8	29.15	0.194384	0.0418512
356	6.23	4.43	20.73	3.13	8.44	0.150989	0.0488934		356	4.26	3.22	10.5	2.54	6.87	0.241905	0.109828		527	6.19	4.89	23.73	12.33	33.29	0.519595	0.159095		527	9.55	7	51.33	12.67	34.21	0.246834	0.0517105
356	11.05	9.24	78.09	37.84	102.16	0.484569	0.0766031		356	4.07	2.99	9.09	2.16	5.82	0.237624	0.113375		527	6.66	5.88	29.53	18.31	49.43	0.620047	0.151866		527	4.43	2.36	5.28	1.85	4.99	0.350379	0.143201
356	9.91	6.89	53.61	23.95	64.67	0.446745	0.0972288		356	3.48	3.02	7.89	1.7	4.6	0.215463	0.102296		527	4.59	4.24	14.7	7.63	20.6	0.519048	0.176596		527	5.65	4.94	21.7	11.1	29.97	0.511521	0.153752
401	7.64	5.54	32.25	16.92	45.69	0.524651	0.137813		356	6.4	5.45	27.11	10.19	27.53	0.375876	0.102377		527	5.48	4.54	19.1	11.02	29.76	0.576963	0.186333		527	4.44	3.85	13.35	2.9	7.83	0.217228	0.0841579
401	9.34	8.44	55.52	28.05	75.74	0.505223	0.0805198		356	8.21	7.38	46.8	20.68	55.83	0.44188	0.0883275		527	4.92	4.14	15.17	8.78	23.72	0.578774	0.198852		527	6.41	5.32	26.56	7.61	20.55	0.286521	0.0801133
401	7.59	6.14	35.82	19.02	51.36	0.530988	0.12695		356	4.36	3.64	12.08	3.21	8.66	0.265728	0.106125		527	11.1	7.05	31.67	15	40.49	0.473634	0.0519268		527	6.4	5.15	24.17	5.73	15.46	0.237071	0.0644706
401	9.34	6.07	43.11	23.9	64.52	0.554396	0.13264		356	6.57	5.06	24.34	6.81	18.4	0.279786	0.0773183		527	6.11	5.35	25.45	16.26	43.9	0.6389	0.177571		527	6.21	5.26	23.81	6.64	17.92	0.278874	0.0738085
401	5.54	4.71	20.31	10.27	27.72	0.505662	0.159595		356	4.02	3.38	10.62	2.28	6.16	0.214689	0.0948149		527	8.36	6.1	39.39	24.98	67.44	0.634171	0.153366		527	5.8	4.79	21.71	4.77	12.87	0.219714	0.0684575
401	5.98	5.63	25.61	14.68	39.62	0.573214	0.147914		356	5.66	4.5	19.38	4.63	12.5	0.238906	0.0771509		527	6.1	5.39	24.81	13.75	37.13	0.554212	0.148182		527	7.57	5.39	31.33	15.79	42.64	0.50399	0.137123
401	12.69	10.74	104.78	79.02	213.35	0.754152	0.103102		356	4.04	3.43	10.51	2.5	6.74	0.237869	0.100455		527	4.93	3.89	14.93	7.71	20.81	0.51641	0.197383		527	4.74	3.83	13.75	6.66	17.99	0.484364	0.182936
401	7.8	6.38	38.28	24.26	65.51	0.633751	0.145934		356	4.82	3.65	13.16	4.04	10.9	0.306991	0.120157		527	5.15	4.36	16.53	6.45	17.41	0.3902	0.125829		527	5.52	3.98	17.13	3.9	10.52	0.227671	0.0851845
401	7.19	6.39	34.78	20.26	54.71	0.582519	0.131798		356	5.39	4.28	17.78	5.18	13.99	0.291339	0.100197		527	3.66	2.92	8.1	2.34	6.31	0.288889	0.143209		527	6.25	5.1	24.95	6.22	16.8	0.249299	0.0730754
401	7.25	5.57	30.77	11.06	29.85	0.359441	0.0939092		356	8.36	7.55	48.61	22.83	61.65	0.469656	0.0914971		527	5.97	4.47	20.86	5.03	13.57	0.241131	0.0805341		527	7.11	5.53	30.46	8.83	23.84	0.289888	0.0775608
401	6.73	4.55	23.73	11.46	30.95	0.482933	0.15709		356	7.35	6.17	34.45	13.18	35.59	0.382583	0.089962		527	6.88	6.02	31.88	18.75	50.62	0.588143	0.143622		527	8.59	8.06	53.18	36.63	98.89	0.688793	0.125365
401	7.42	6.75	38.69	23.24	62.76	0.600672	0.131288		356	6.17	4.94	23.48	5.82	15.72	0.247871	0.0738219		527	5.18	4.05	16.07	8.49	22.92	0.528314	0.19084		527	5.62	4.55	19.92	4.08	11.03	0.204819	0.0669734
401	10.64	9.97	82.31	64.3	173.61	0.781193	0.116113		356	7.21	5.31	28.68	13.08	35.33	0.456067	0.122881		527	5.05	4.05	12.62	4.35	11.75	0.344691	0.100297		527	7.27	5.87	32.99	10.29	27.79	0.311913	0.0784524
401	10.65	9.01	74.69	63.27	170.83	0.847101	0.139766		401	4.52	4.02	18.18	7.52	20.3	0.413641	0.19662		527	4.26	3.39	11.2	7.52	20.32	0.671429	0.293366		527	4.8	4.28	16.06	3.41	9.21	0.212329	0.0740674
401	6.48	5.69	28.54	14.44	38.98	0.505957	0.131453		401	6.67	6.41	33.34	21.5	58.04	0.644871	0.14983		527	5.12	4.5	17.89	7.02	18.96	0.392398	0.129313		527	6.6	5.25	26.79	8.47	22.86	0.316163	0.0889247
401	6.35	4.95	24.26	12.95	34.96	0.5338	0.15896		401	13.06	12.5	125.72	101.52	274.12	0.807509	0.0950145		527	5.67	4.91	21.27	12.19	32.92	0.573108	0.170317		527	5.53	4.54	19.63	5.65	15.26	0.287825	0.0946701
401	6.22	4.38	21.03	9.16	24.73	0.435568	0.146608		401	8.07	5.82	34.8	19.19	51.81	0.551437	0.134078		527	4.55	3.59	12.35	4.8	12.95	0.388664	0.15633		527	4.75	3.12	10.71	3.92	10.59	0.366013	0.161914
401	7.78	6.86	40.99	24.74	66.8	0.603562	0.129055		401	12.78	10	97.28	71.49	193.01	0.734889	0.106836		527	6.8	3.35	12.05	5.64	15.24	0.46805	0.14115		527	5.02	4.62	17.47	5.31	14.34	0.30395	0.0946473
401	5.56	4.97	21.22	12.02	32.44	0.566447	0.167155		401	4.62	3.65	13.12	5.39	14.55	0.410823	0.167249		527	6.34	4.78	23.71	6.57	17.74	0.277098	0.0866207		527	6.21	5.87	28.48	8.12	21.93	0.285112	0.0724752
401	7.45	5.06	29.17	19.96	53.9	0.684265	0.19985		401	4.87	3.34	12.65	3.62	9.78	0.286166	0.127259		527	8.16	5.15	33.83	8.66	23.38	0.255986	0.0764213		527	8.42	6.62	43.12	16.63	44.89	0.385668	0.0860727
401	12.99	10.07	101.74	81.37	219.69	0.799784	0.117977		401	6.16	5.29	25.33	11.28	30.46	0.445322	0.124974		527	7.78	5.97	35.11	21.58	58.26	0.61464	0.148636		527	6.52	4.23	16.61	4.82	13.01	0.290187	0.0789078
401	12.93	11.4	111.69	90.23	243.61	0.807861	0.102552		401	6.92	5.79	30.59	14.57	39.33	0.476299	0.119949		527	6.05	4.68	21.85	10.08	27.22	0.461327	0.145283		527	5.01	2.28	7.89	2.25	6.08	0.285171	0.164997
401	6.25	4.94	23.57	11.6	31.31	0.492151	0.145253		401	6.19	4.84	23.1	10.76	29.05	0.465801	0.14172		527	4.63	3.73	12.48	6.58	17.76	0.527244	0.195087		527	6.07	5.65	26.83	8.28	22.36	0.30861	0.0816105
401	9.36	6.94	50	24.73	66.76	0.4946	0.104768		401	6.77	5.78	29.88	13.11	35.41	0.438755	0.110703		527	5.59	4.12	17.98	6.61	17.85	0.367631	0.133044		527	7.41	6.25	35.64	14.07	38	0.394781	0.0928362
401	9.28	7.61	54.6	28.78	77.72	0.527106	0.102276		401	5.36	4.63	18.88	8.78	23.7	0.465042	0.145938		527	3.33	2.67	6.77	3.12	8.41	0.460857	0.251009		527	5.24	4.27	17.85	8.51	22.98	0.476751	0.170116
401	11.95	10.85	101.15	85.09	229.74	0.841226	0.115519		401	5.21	4.04	15.93	6.57	17.74	0.412429	0.147559		527	5.74	4.63	19.9	9.29	25.07	0.466834	0.144193		527	6.34	6.12	30.4	9.73	26.28	0.320066	0.0782568
401	5.72	4.17	17.89	8.39	22.65	0.468977	0.1611		401	5.21	4.04	15.93	5.89	15.9	0.369743	0.132287		527	5.98	4.09	18.45	8.23	22.23	0.44607	0.157128		527	7.86	7.07	43.41	17.49	47.22	0.402903	0.0850217
401	9.8	9.16	69.69	55.21	149.06	0.792223	0.128234		401	9.77	8.42	63.56	51.61	139.34	0.811989	0.142304		527	4.41	3.75	12.67	6.83	18.43	0.539069	0.21034		527	6.01	5.81	26.94	8.25	22.27	0.306236	0.0776656
401	8.01	7.2	38	18.95	51.16	0.498684	0.0871592		401	5.7	5.24	23.28	11.34	30.61	0.487113	0.138381		527	9.66	5.95	24.17	9.95	26.87	0.411667	0.0555665		527	10.59	6.74	31.83	13.73	37.06	0.431354	0.0545075
527	19.02	15.26	227.93	182.6	493.02	0.801123	0.0787377		401	4.09	3.73	11.63	4.45	12.01	0.382631	0.149355		527	7.23	7.18	40.15	30.32	81.88	0.755168	0.155361		527	4.79	3.61	13.14	6.1	16.48	0.464231	0.18663
527	7	6	31.37	21.25	57.39	0.677399	0.16105		401	3.34	2.77	7.31	4.15	11.21	0.567715	0.309274		527	6.02	5.52	25.84	15.99	43.18	0.618808	0.166485		527	4.86	4.07	15.45	4.06	10.95	0.262783	0.0963169
527	19.02	15.03	224.56	201.62	544.39	0.897845	0.0896203		401	4.42	3.76	12.55	6.29	16.98	0.501195	0.192245		527	7.45	5.89	34.01	12.29	33.17	0.361364	0.0908168		527	7.34	5.79	33.14	12.07	32.59	0.364212	0.0936819
527	8.37	6.24	40.68	25.23	68.13	0.620206	0.147851		401	5.37	4.18	16.85	7.78	21.01	0.461721	0.158363		527	5.32	3.98	16.46	3.77	10.19	0.22904	0.0854407		527	5.31	4.24	17.54	4.61	12.45	0.262828	0.0922308
527	7.91	6.76	41.78	30.09	81.24	0.720201	0.158984		401	8.74	7.08	47.34	28.42	76.72	0.600338	0.123893		527	6.1	5.14	23.22	11.5	31.05	0.495263	0.136283		527	4.47	4.17	14.52	3.27	8.82	0.225207	0.080347
527	7.35	6.29	35.81	25.1	67.76	0.700922	0.164849		401	5.17	3.95	15.83	6.84	18.47	0.432091	0.161947		527	7.68	5.35	31.58	9.76	26.35	0.309056	0.0847974		527	5.65	4.41	19.56	5.82	15.7	0.297546	0.101158
527	6.27	5.53	26.63	16.28	43.95	0.611341	0.162158		401	8.27	7.19	45.74	28.87	77.94	0.631176	0.128969		527	5.84	3.9	17.68	4.86	13.13	0.274887	0.104495		527	5.14	3.81	15.32	3.79	10.22	0.247389	0.0970125
527	6.05	5.09	23.84	13.55	36.59	0.568372	0.165101		401	8.9	8.44	57.31	41.99	113.39	0.732682	0.126495		527	5.17	3.75	15.06	6.9	18.63	0.458167	0.181258		527	4.66	3.75	13.66	3.26	8.8	0.238653	0.0950103
527	6.43	5.3	26.63	18.12	48.94	0.680436	0.191601		401	5.07	4.07	16.04	8.18	22.09	0.509975	0.186019		527	5.79	4.43	19.65	10.34	27.92	0.526209	0.173794		527	5.63	4.58	20.06	8.54	23.06	0.425723	0.138108
527	5.16	3.86	14.03	6.71	18.11	0.478261	0.166686		401	4.56	3.98	14.06	5.15	13.9	0.366287	0.136169		527	4.65	3.12	10.61	4.19	11.3	0.39491	0.176788		527	5.73	4.87	21.65	6.95	18.77	0.321016	0.0976728
527	8.23	6.05	38.58	23.4	63.19	0.606532	0.148357		401	6.29	4.47	21.56	9.41	25.4	0.436456	0.142996		527	4.58	3.58	12.41	4.87	13.15	0.392425	0.158452		527	5.83	5.09	23.14	7.37	19.9	0.318496	0.093189
527	5.97	4.75	22.23	13.37	36.1	0.601439	0.189571		401	4.62	3.96	14.19	5.76	15.54	0.40592	0.151842		527	4.24	3.56	11.33	5.3	14.32	0.467785	0.18837		527	4.5	3.82	13.43	3.02	8.15	0.22487	0.0878353
527	5.94	4.36	20.49	10.6	28.63	0.517326	0.179287		401	7.84	6.69	40.05	23.24	62.75	0.580275	0.126494		527	4.93	3.73	14.34	6.53	17.63	0.45537	0.181823		527	6.6	5.34	27.22	9.21	24.88	0.338354	0.0934619
527	6.45	5.99	30.02	18.77	50.69	0.62525	0.1549		401	6.12	3.7	17.53	8.52	23	0.486024	0.194216		527	6.81	6.48	32.76	8.1	21.88	0.247253	0.054099		527	5.68	4.3	9.82	2.85	7.7	0.290224	0.0518276
527	7.39	5.56	31.26	14.98	40.45	0.479207	0.125233		401	4.18	2.84	9.27	3.94	10.65	0.425027	0.223195		527	6.17	4.92	23.63	10.81	29.18	0.457469	0.138233		527	5.88	5.17	23.7	7.71	20.81	0.325316	0.0936909
527	8.9	7.01	48.33	28.34	76.52	0.586385	0.123759		401	4.78	3.57	13.34	5.19	14.02	0.389055	0.162706		527	4.81	3.52	12.9	4.54	12.25	0.351938	0.145488		527	6.12	5.06	23.52	8.72	23.54	0.370748	0.106283
527	7.65	5.58	32.32	18.63	50.29	0.576423	0.149377		401	7.92	7.57	46.12	26.54	71.66	0.575455	0.111683		527	5.86	4.39	19.43	4.54	12.26	0.233659	0.0767769		527	5.5	5.23	22.08	6.9	18.62	0.3125	0.087596
527	8.98	8.11	56.49	41.7	112.58	0.738184	0.13484		401	4.79	3.01	10.3	4.45	12.03	0.432039	0.195836		527	5.82	4.24	19.16	8.59	23.19	0.44833	0.156798		527	6.89	5.79	31.27	10.86	29.32	0.347298	0.0897956
527	8.83	7.82	53.04	37.56	101.4	0.708145	0.132847		401	5.69	3.83	17.02	9.2	24.83	0.540541	0.210513		527	4.49	3.72	10.09	4.72	12.74	0.46779	0.145081		577	4.96	3.5	13.52	5.14	13.88	0.380178	0.161565
527	6.75	5.65	29.54	15.52	41.91	0.525389	0.13756		401	5.28	3.73	15.3	7.48	20.19	0.488889	0.194469		527	5.74	4.82	21.08	10.85	29.29	0.514706	0.155391		577	7.5	3.69	14.29	4.59	12.39	0.321204	0.085842
527	5.79	4.98	22.33	9.69	26.17	0.433945	0.128881		401	4.25	3.69	12.24	4.67	12.61	0.381536	0.154126		527	6.34	4.46	15.48	4.87	13.15	0.314599	0.0737516		577	5.9	5.4	24.91	6.37	17.2	0.255721	0.0707133
527	6.7	5.22	26.53	13.11	35.4	0.494158	0.137148		401	4.59	3.53	12.38	3.81	10.28	0.307754	0.127223		527	4.74	4.05	14.8	5.42	14.64	0.366216	0.133141		577	8.33	6.81	43.65	23.16	62.52	0.530584	0.114499
527	5.21	4.17	16.71	8.82	23.83	0.527828	0.185935		401	6.64	5.9	30.55	14.38	38.82	0.470704	0.11882		527	5.02	4.08	15.59	7.12	19.23	0.456703	0.162726		577	6.94	5.19	26.37	6.48	17.49	0.245734	0.0662037
527	7.17	4.88	27.21	15.59	42.1	0.572951	0.174377		401	5.29	4.95	20.34	9.9	26.72	0.486726	0.145872		527	6.13	4.95	23.17	12.64	34.12	0.545533	0.160723		577	7.31	5.02	27.42	7.96	21.5	0.290299	0.0825258
527	6.66	4.82	24.08	10.58	28.57	0.439369	0.130593		527	5.55	3.69	10.86	3.76	10.16	0.346225	0.0950262		527	5.53	4.49	19.12	8.33	22.5	0.435669	0.142702		577	4.85	3.89	14.66	1.75	4.73	0.119372	0.0455406
527	7.1	5.71	31.03	19	51.31	0.612311	0.156756		527	3.53	3.18	8.6	3.22	8.7	0.374419	0.172277		527	5.16	4.3	16.86	10.87	29.34	0.644721	0.217593		577	5.88	5.21	23.62	4.42	11.92	0.18713	0.0528897
527	5.54	5.16	21.44	8.69	23.47	0.405317	0.112515		527	7.82	6.67	40.72	17.63	47.59	0.432957	0.0967822		527	6.46	5.51	27.31	18.91	51.07	0.69242	0.184144		577	6.18	4.96	23.84	6.07	16.4	0.254614	0.0762497
527	6.24	4.93	23.47	14.12	38.13	0.601619	0.177811		527	8.76	8.29	56.49	26.23	70.83	0.46433	0.0832121		527	6.28	4.61	21.91	14.8	39.96	0.675491	0.211788		577	4.76	3.76	9.39	1.66	4.47	0.176784	0.0471115
527	7.03	6.03	31.98	18.44	49.8	0.57661	0.137776		527	5.94	5.61	25.87	16	43.19	0.618477	0.163459		527	6.19	4.63	21.19	11.65	31.46	0.549788	0.167677		577	4.85	4.27	16.11	3.41	9.2	0.21167	0.0736475
527	8.69	7.12	47.54	33.91	91.55	0.713294	0.147011		527	6.61	5.19	26.78	10.73	28.97	0.400672	0.115097		527	5.86	4.91	22.37	12.84	34.66	0.573983	0.173582		577	4.63	3.97	13.95	1.56	4.22	0.111828	0.0408286
527	7.77	6.57	39.54	31.35	84.63	0.792868	0.17852		527	4.43	3.37	11.59	5.3	14.3	0.457291	0.201193		527	4.86	3.6	13.34	6.07	16.38	0.455022	0.184055		577	5.23	4.16	16.5	4.08	11.02	0.247273	0.0860941
527	5.84	5.28	23.82	14.1	38.08	0.59194	0.165402		527	5.8	5.3	23.57	12.52	33.79	0.531184	0.146766		527	5.98	4.89	22.75	11.95	32.26	0.525275	0.159606		577	6.32	4.75	23.42	8.62	23.29	0.368061	0.115453
527	5.74	5.59	24.94	20.2	54.54	0.809944	0.215089		527	9.08	6.72	47.45	31.26	84.4	0.658799	0.145602		527	4.87	4.12	15.4	8.94	24.15	0.580519	0.206545		577	5.37	4.38	17.96	2.11	5.7	0.117483	0.0391166
527	7.27	6.32	35.61	25.78	69.6	0.723954	0.169557		527	9.71	8.9	67.18	44.14	119.19	0.657041	0.109606		527	5.82	4.67	20.84	12.69	34.26	0.608925	0.190944		577	7.71	6.88	40.38	20.17	54.46	0.499505	0.105554
527	6.3	4.78	23.27	14.46	39.05	0.621401	0.191855		527	6.94	5.36	28.6	17.17	46.37	0.60035	0.164468		527	6.56	4.9	23.99	13.75	37.12	0.573155	0.166728		577	8.41	4.55	28.26	4.45	12.01	0.157466	0.0488138
527	14.39	12.1	136.21	116.48	314.5	0.85515	0.10559		527	11.66	10.22	91.67	86.37	233.21	0.942184	0.135445		527	4.99	3.24	12.46	4.35	11.75	0.349117	0.158599		577	5.98	4.54	24.45	4.07	10.98	0.166462	0.0630642
527	7.19	6.64	37.21	24.83	67.04	0.667294	0.149594		527	5.95	4.31	18.86	9.06	24.45	0.480382	0.156552		527	4.38	3.28	11.15	6.84	18.47	0.613453	0.277227		577	5.76	4.93	21.72	2.92	7.89	0.134438	0.0398353
527	6.39	5.31	26.07	19.9	53.74	0.763329	0.210943		527	5.32	5.1	21.09	10.37	27.99	0.491702	0.143129		527	5.94	3.9	17.59	8.41	22.7	0.478113	0.17778		577	4.78	4.25	15.82	3.1	8.37	0.195954	0.0685737
527	6.92	5.11	26.65	14.05	37.92	0.527205	0.148501		527	6.91	5.24	28.29	11.95	32.27	0.422411	0.12029		527	4.96	3.64	13.79	5.85	15.79	0.42422	0.170009		577	7.65	6.35	37.97	9.54	25.76	0.251251	0.0590664
527	18.99	15.17	225.82	184.03	496.89	0.814941	0.0804255		527	7.15	5.73	31.94	11.54	31.16	0.361302	0.0938841		527	5.8	3.79	16.42	8	21.59	0.487211	0.183394		577	7.49	5.62	32.76	20.02	54.06	0.611111	0.161626
577	7.41	7.05	39.43	30.23	81.62	0.766675	0.156763		527	9.31	7.93	57.87	34.43	92.95	0.594954	0.112316		527	5.8	3.77	17.03	8.07	21.79	0.47387	0.186967		577	7.37	6.49	36.3	8.36	22.58	0.230303	0.0514341
577	10.39	7.31	58.57	9.06	24.47	0.154687	0.0311659		527	7.21	6.55	36.86	22.05	59.55	0.598209	0.136142		527	7.75	5.14	24.33	6.94	18.75	0.285245	0.0647341		690	4.23	3.25	10.56	2.26	6.11	0.214015	0.0966057
577	7.64	7.16	43.46	30.85	83.28	0.709848	0.150431		527	4.17	3.25	10.51	4.06	10.95	0.386299	0.176045		577	6.39	4.36	21.33	10.8	29.17	0.506329	0.169805		690	3.43	2.61	6.84	1.43	3.85	0.209064	0.116886
577	8.43	5.6	36.81	11.1	29.98	0.301548	0.0801901		527	6.6	5.97	30.89	13.38	36.13	0.43315	0.108634		577	7.81	4.59	13.31	3.81	10.28	0.286251	0.0442232		690	4.33	3.76	12.49	3.15	8.51	0.252202	0.0982762
577	5.94	4.5	19.88	8.91	24.05	0.448189	0.141471		527	11.99	11.05	102.32	91.2	246.25	0.891321	0.118974		577	5.7	4.78	21.05	4.24	11.46	0.201425	0.062178		690	4.34	3.96	13.22	3.2	8.63	0.242057	0.0897989
577	7.57	6.82	40.39	24.42	65.93	0.604605	0.132459		527	6.39	5.4	26.75	9.22	24.89	0.344673	0.0945026		577	7.31	7.04	40.23	29.19	78.82	0.725578	0.153877		690	6.84	6.15	32.39	16.45	44.41	0.507873	0.12144
577	10.02	5.89	45.93	10.82	29.21	0.235576	0.0594471		527	5.21	5.07	19.77	8.96	24.2	0.453212	0.127778		577	6.71	6.02	31.42	10.13	27.36	0.322406	0.0795601		690	5.24	4.1	16.63	5.89	15.89	0.354179	0.127708
577	7.46	4.61	24.49	8.77	23.67	0.358105	0.105648		527	4.78	3.83	13.76	5.28	14.24	0.383721	0.143817		577	4.91	4.43	16.97	4.2	11.34	0.247496	0.0832457		690	8.06	6.11	37.27	21.51	58.08	0.57714	0.136529
577	7.83	3.87	20.51	8.99	24.28	0.438323	0.146412		527	7.54	5.13	29.99	14.8	39.96	0.493498	0.142448		577	4.81	3.46	13	7.51	20.28	0.577692	0.249083		690	7.1	5.06	27.61	15.41	41.6	0.558131	0.161899
577	12.08	7.89	73.04	18.18	49.08	0.248905	0.0461715		527	6.69	5.29	27.67	9.83	26.53	0.355258	0.100281		577	5.98	5.27	23.95	12.85	34.69	0.536534	0.147769		690	4.76	4.47	15.91	8.58	23.16	0.539283	0.172293
577	10.8	6.32	53.21	12.13	32.76	0.227965	0.0537037		527	5.05	4.75	18.36	6.2	16.75	0.337691	0.103924		577	6.84	6.08	32.2	23.92	64.59	0.742857	0.180676		690	4.43	2.89	9.71	3.97	10.73	0.408857	0.204924
577	8.27	6.84	41.74	33.68	90.94	0.8069	0.166248		527	9.4	8.38	62.99	34.62	93.48	0.549611	0.100164		577	5.32	3.65	14.96	7.21	19.47	0.481952	0.194285		690	4.76	4.04	14.99	6.9	18.64	0.460307	0.169621
577	6.16	4.88	23.18	11.84	31.97	0.510785	0.154146		527	4.79	3.44	12.75	5.06	13.67	0.396863	0.17049		577	5.06	3.43	13.17	5.45	14.71	0.413819	0.174847		762	5.95	3.96	14.05	4.67	12.61	0.332384	0.0955897
577	8.09	6.14	38.66	23.63	63.81	0.611226	0.147972		527	7.43	5.94	34.54	17.12	46.23	0.495657	0.124722		577	5.51	4.27	17.01	7.49	20.23	0.440329	0.142389		762	4.52	3.55	12.4	7.12	19.24	0.574194	0.238719
577	14.43	9.92	87.55	19.69	53.16	0.2249	0.0264824		527	8.04	6.29	38.84	28.51	76.96	0.734037	0.171175		577	7.43	5.89	33.7	12.64	34.12	0.375074	0.0936546		762	4.46	3.63	8.58	3.07	8.28	0.357809	0.0997681
577	12.74	11.92	117.99	123.18	332.58	1.04399	0.129963		527	12.05	10.72	99.91	80.7	217.9	0.807727	0.111301		577	6.77	4.73	22.57	8.13	21.96	0.360213	0.102513		762	5.73	4.6	20.39	5.47	14.78	0.268269	0.0861625
577	11.2	7.71	42.63	10.42	28.12	0.244429	0.0298911		527	6.88	6.08	32.55	13.32	35.95	0.409217	0.100025		577	5.62	4.36	18.97	10.6	28.63	0.558777	0.189495		762	5.6	4.36	19.13	5.87	15.86	0.306848	0.105312
577	8.78	6.76	45.56	24.16	65.24	0.53029	0.115003		527	7.33	6.03	34.41	12.37	33.4	0.359489	0.0886406		577	4.48	3.38	10.7	1.14	3.07	0.106542	0.0425397		762	4.38	3.84	13.08	4.89	13.21	0.373853	0.144602
577	6.73	5.46	28.04	12.59	34	0.449001	0.119847		527	5.4	3.67	15.24	8.97	24.22	0.588583	0.235542		577	4.84	3.54	13.35	3.45	9.32	0.258427	0.108635		762	5.51	5.49	23.45	7.41	20	0.315991	0.0852164
577	7.17	5.19	28.69	5.55	14.99	0.193447	0.0548833		527	6.77	6.15	32.69	14.21	38.37	0.43469	0.105988		577	5.06	1.96	5.39	1.48	4	0.274583	0.145412		762	5.48	4.89	21.03	6.15	16.61	0.292439	0.0896351
577	7.7	5.95	35.71	9.52	25.71	0.266592	0.0666981		527	4.41	3.98	13.37	7.43	20.07	0.555722	0.203135		577	7.01	2.92	8.99	2.62	7.06	0.291435	0.083718		762	6.04	5.55	26.22	6.75	18.24	0.257437	0.0692919
577	10.29	7.61	46.8	13.81	37.3	0.295085	0.0442599		527	4.93	3.43	12.99	6.17	16.67	0.474981	0.203166		577	4.92	3.44	12.8	1.57	4.25	0.122656	0.0515014		762	5.49	4.61	19.52	4.91	13.25	0.251537	0.0803727
577	9.55	6.43	46.35	11.09	29.94	0.239266	0.0536423		527	6.1	3.74	16.86	9.88	26.68	0.586002	0.221149		577	3.9	3.88	11.62	2.73	7.36	0.23494	0.0888047		762	6.38	4.89	24.46	6.26	16.91	0.255928	0.0783677
577	6.2	5.22	25.22	14.09	38.03	0.558684	0.159287		527	9.17	8.27	59.01	35.94	97.04	0.609049	0.109446		577	4.85	3.91	14.65	2.17	5.87	0.148123	0.0558941		865	13.3	12.48	129.52	79.22	213.9	0.611643	0.0730391
577	12.31	9.14	88	80.98	218.65	0.920227	0.150393		527	6.75	5.7	30.4	19.62	52.99	0.645395	0.170863		577	5.22	4.07	16.1	4.7	12.7	0.291925	0.10381		865	7.87	4.82	16.17	7.16	19.33	0.442795	0.0747904
690	5.75	4.67	20.71	9.51	25.67	0.459198	0.144837		527	6.43	5.16	25.63	15.32	41.36	0.597737	0.170903		577	5.6	5.01	21.22	10.02	27.06	0.472196	0.136146		865	4.96	3.85	14.92	7.57	20.44	0.507373	0.19665
690	8.03	6.19	38.7	18.17	49.06	0.469509	0.112787		527	6.75	5.15	26.24	20.19	54.52	0.769436	0.215387		577	6.26	4.49	21.65	5.55	14.99	0.256351	0.08399		865	5.34	4.81	19.93	10.72	28.93	0.537883	0.165716
690	8.44	5.99	39.32	18.17	49.05	0.462106	0.114594		527	3.72	3.28	9.25	4.21	11.36	0.455135	0.200906		577	4.81	4.3	15.55	4.86	13.11	0.31254	0.104365		865	6.25	5.2	25.1	16.54	44.65	0.658964	0.186918
690	8.19	6.45	41.05	14.01	37.84	0.341291	0.0785301		527	6.45	5.92	29.96	8.9	24.03	0.297063	0.0751949		577	5.06	4.48	17.26	4.96	13.4	0.28737	0.0932774		865	7.05	5.57	30.63	19.91	53.76	0.650016	0.173849
690	9.41	7.45	54.01	31.04	83.81	0.574708	0.113507		527	6.05	5.55	25.81	13.21	35.66	0.511817	0.135383		577	4.98	3.51	12.77	4.34	11.73	0.339859	0.135098		883	5.51	4.49	18.5	10.55	28.49	0.57027	0.181388
690	4.66	3.9	14.11	5.48	14.79	0.388377	0.147661		527	7.64	6.07	35.67	17.84	48.17	0.50014	0.121039		577	5.54	4.73	20.23	4.69	12.65	0.231834	0.0722674		883	8.33	5.35	33.03	14.22	38.38	0.430518	0.113906
690	5.63	4.91	20.94	11.07	29.89	0.528653	0.155768		527	6.6	5.07	26.14	12.59	34	0.481637	0.141732		577	5.7	4.63	20.37	5.6	15.12	0.274914	0.0875291		883	4.12	3.94	10.99	4.95	13.37	0.450409	0.147814
690	7.26	5.34	29.7	14.23	38.42	0.479125	0.131277		527	7.46	6.02	34.56	13.84	37.36	0.400463	0.09777		577	6.86	3.95	17.55	5.74	15.5	0.327066	0.102422		883	4.77	4.04	15.05	7.36	19.86	0.489037	0.18055
690	8.36	6.33	41.39	17.76	47.95	0.429089	0.101258		577	9.26	8.6	60	41.57	112.23	0.692833	0.115924		577	5.66	3.35	12.03	2.71	7.32	0.22527	0.0814826		883	6.84	4.62	23.72	13	35.11	0.548061	0.170061
690	5.89	4.83	21.9	12.65	34.15	0.577626	0.175826		577	11.82	9.98	91.49	65.24	176.14	0.713083	0.105837		577	6.43	5.14	25.79	11.55	31.2	0.447848	0.129851		929	10.88	8.44	71.79	30.6	82.61	0.426243	0.0754065
690	7.87	5.95	36.57	15.81	42.68	0.432322	0.108374		577	7.17	6.48	35.44	28.23	76.21	0.796558	0.179078		577	6.3	4.84	23.66	5.53	14.94	0.233728	0.0715641		1051	3.63	3.14	8.82	2.89	7.8	0.327664	0.154217
690	7.47	5.94	34.65	19.13	51.65	0.552092	0.138619		577	6.81	5.39	28.38	13.92	37.58	0.490486	0.134374		690	5.18	3.75	15.07	8.53	23.04	0.566025	0.223644		1051	5.06	4.46	16.41	6.38	17.22	0.388787	0.12106
690	9.61	7.54	56.24	29.68	80.14	0.527738	0.103753		577	8.55	8.17	54.12	43.03	116.18	0.795085	0.144		690	4.11	3.4	10.7	2.99	8.08	0.279439	0.120191		1051	7.46	6.25	35.09	7.69	20.77	0.219151	0.0503998
690	9.45	7.9	58.44	33.01	89.13	0.564853	0.106896		577	8.39	6.83	44.79	29.05	78.45	0.648582	0.141757		690	5.65	4.18	18.47	5.75	15.52	0.311316	0.111242		1051	4.29	3.6	11.97	5.49	14.84	0.458647	0.188587
690	6.11	4.7	22.34	9.25	24.97	0.414056	0.13089		577	8.35	7.25	47.23	25.05	67.62	0.530383	0.109005		690	7.03	5.98	30.81	9.73	26.28	0.315807	0.0739191		1051	5.02	4.04	15.04	6.95	18.76	0.462101	0.162002
690	8.38	6.78	43.83	24.29	65.59	0.554187	0.120427		577	6.96	6.3	33.76	27.54	74.37	0.815758	0.190404		690	4.85	4.38	16.53	6.32	17.05	0.382335	0.129726		1051	4.8	3.59	12.93	5.78	15.61	0.447022	0.178443
690	7.09	4.47	23.89	14.42	38.94	0.6036	0.194404		577	6.11	5.49	26.13	19.55	52.79	0.748182	0.202751		690	3.89	3.25	9.73	6.67	18.02	0.685509	0.310035		1051	4.87	4.38	16.21	3.9	10.52	0.240592	0.0797239
690	10.08	6.99	53	35.77	96.58	0.674906	0.138709		577	7.58	6.29	37.33	25.96	70.1	0.695419	0.165324		690	5.05	3.76	14.11	6.32	17.06	0.447909	0.169064		1051	3.78	3.6	9.97	4.35	11.74	0.436309	0.169587
690	10.26	7.15	56.91	33.58	90.66	0.590054	0.122271		577	8.53	7.66	50.43	39.82	107.52	0.789609	0.151948		690	4.81	3.74	13.8	5.11	13.79	0.37029	0.145055		1051	4.54	3.62	12.77	5.96	16.11	0.466719	0.191326
690	11.65	9.95	90.6	51.03	137.78	0.563245	0.0844996		577	11.64	9.84	89.18	61.53	166.12	0.689953	0.104267		690	4	2.46	7.58	2.12	5.74	0.279683	0.167266		1051	4.74	4.31	15.67	6.22	16.81	0.396937	0.134915
690	6.5	5.04	25.59	13.11	35.39	0.512309	0.151646		577	5.64	4.66	20.39	5.02	13.55	0.246199	0.0782806		690	5.01	4	15.6	9.47	25.56	0.607051	0.225628		1051	4.1	3.25	9.8	2.9	7.82	0.295918	0.127894
690	9.56	7.15	53.24	21.53	58.13	0.404395	0.0841348		577	7.68	5.88	33.58	18.9	51.02	0.562835	0.13594		690	4.69	3.98	14.55	5.56	15.02	0.382131	0.142935		1051	4.77	4.37	15.76	6.75	18.23	0.428299	0.141522
690	8.75	6.75	46.12	18.29	49.37	0.396574	0.0876192		577	4.8	4.46	16.7	2.64	7.14	0.158084	0.0528073		690	4.7	3.68	13.43	3.62	9.76	0.269546	0.108622		1051	3.69	2.92	8.31	4.59	12.39	0.552347	0.278626
690	7.01	5.05	27.89	12.09	32.65	0.433489	0.12916		577	6.72	6.49	33.14	18.02	48.65	0.543754	0.12159		690	4.47	3.02	10.46	3.57	9.63	0.3413	0.167243		1051	3.38	3.29	8.65	4.21	11.37	0.486705	0.219773
690	8.58	6.32	42.32	18.17	49.07	0.429348	0.101259		577	6.91	5.69	30.79	9.37	25.29	0.30432	0.0799905		690	3.75	2.76	8.17	2.68	7.24	0.328029	0.179179		1051	3.7	3.16	8.98	4.06	10.97	0.452116	0.209871
690	5.71	4.57	20.32	11.71	31.63	0.57628	0.187538		577	5.35	5.24	21.83	8.44	22.79	0.386624	0.109731		690	4.6	3.46	11.7	3.56	9.62	0.304274	0.123464		1051	6.03	5.47	25.66	11.53	31.13	0.449337	0.12205
690	5.74	4.95	22	14.78	39.9	0.671818	0.200703		577	6.59	6.13	30.66	11.78	31.8	0.384214	0.0908532		690	3.32	2.88	7.28	1.81	4.9	0.248626	0.125533		1051	3.95	3.82	11.58	3.85	10.41	0.33247	0.127567
690	8.79	7.45	50.99	31.2	84.25	0.611885	0.122139		577	6.76	4.61	23.93	8.92	24.09	0.372754	0.118582		690	4.91	3.56	14.95	7.91	21.36	0.529097	0.242771		1051	4.56	3.23	11.07	6.03	16.28	0.544715	0.242074
690	9.26	7.51	54.05	35.1	94.76	0.649399	0.128356		577	6.31	5.46	26.79	15.6	42.13	0.582307	0.158384		690	5.83	3.2	14.4	6.17	16.65	0.428472	0.197387		1051	4.18	3.53	11.29	5.63	15.19	0.498671	0.206435
690	6.54	5.34	27.04	10.62	28.68	0.392751	0.108759		577	8.14	5.5	34.57	17.22	46.49	0.49812	0.133563		690	5.48	4.28	17.64	7.73	20.88	0.438209	0.147066		1051	4.62	3.9	14.07	6.03	16.27	0.428571	0.163888
690	4.94	3.39	12.55	3.18	8.59	0.253386	0.10698		577	9.33	7.19	52.34	34.83	94.04	0.665457	0.137916		690	4.03	3.06	9.57	4.33	11.69	0.452456	0.21915		1051	4.85	4.45	16.26	6.85	18.49	0.421279	0.136217
690	6.92	5.83	31.53	19.18	51.8	0.60831	0.155742		577	9.27	7.47	54.2	20.53	55.43	0.378782	0.0758		690	4.28	3.94	12.73	5.52	14.9	0.433621	0.158673		1051	4.57	3.53	11.94	5.42	14.62	0.453936	0.181775
690	6.64	5.42	27.91	14.33	38.68	0.513436	0.140308		690	5.62	4.42	18.99	6.02	16.26	0.317009	0.104717		690	4.37	4.05	13.55	10.13	27.34	0.747601	0.26991		1051	3.28	2.81	7.06	3.57	9.65	0.505666	0.263259
690	7.18	5.4	30.07	11.99	32.37	0.398736	0.109373		690	8.46	7.42	48.45	23.22	62.7	0.479257	0.0952106		690	5.88	4.72	21.74	6.46	17.43	0.297148	0.094183		1051	5.65	3.87	16.41	6.55	17.69	0.399147	0.147833
690	5.87	4.69	20.97	6.57	17.74	0.313305	0.0971814		690	9.79	7.89	59.88	36.59	98.79	0.611055	0.114664		690	3.02	2.18	4.93	1.17	3.16	0.237323	0.155692		1209_20H	5.11	4.12	16.03	3.55	9.6	0.22146	0.0781654
690	12.32	9.25	88.92	56.96	153.8	0.640576	0.103199		690	11.25	8.21	69.09	34.61	93.46	0.500941	0.0871694		690	4.28	3.12	10.39	2.83	7.63	0.272377	0.129728		1209_20H	4.83	4.09	15.46	3.28	8.85	0.21216	0.0775321
690	6.45	5.05	25.36	12.33	33.29	0.486199	0.14316		690	8.85	8.42	57.88	29.54	79.75	0.510366	0.0899175		690	5.21	3.97	15.75	7.79	21.03	0.494603	0.181184		1209_20H	4.66	3.8	8.35	1.63	4.41	0.19521	0.0462632
690	12.11	9.13	86.5	51.77	139.79	0.598497	0.0979476		690	4.36	3.92	13.14	5.1	13.77	0.388128	0.145383		690	5.62	4.54	19.63	7.02	18.96	0.357616	0.115742		1209_20H	7.06	3.85	17	2.69	7.25	0.158235	0.0490939
690	9.29	6.68	48.13	29.44	79.5	0.611677	0.135635		690	7.89	6.54	39.93	26.84	72.47	0.672176	0.151898		690	6.43	4.87	24.41	7.66	20.68	0.313806	0.0959315		1209_20H	5.58	3.96	10.92	2.08	5.63	0.190476	0.0453984
690	7.21	5.19	29.27	16.83	45.45	0.574991	0.165507		690	5.19	5.02	20.14	12.33	33.3	0.612214	0.180049		690	4.4	2.93	9.84	2.73	7.36	0.277439	0.138031		1209_20H	4.44	3.88	12.97	2.3	6.22	0.177332	0.0657178
690	7.68	5.66	33.67	22.22	60	0.659935	0.172485		690	7.6	6.19	36.38	21.42	57.82	0.588785	0.140484		690	5.98	5.01	23.37	7.69	20.76	0.329054	0.0978478		1209_20H	5.79	3.84	9.78	1.5	4.05	0.153374	0.0335546
690	8.39	6.57	42.34	21.86	59.01	0.516297	0.115281		690	6.73	5.53	28.88	17.64	47.62	0.610803	0.163695		690	3.58	2.83	7.5	2.71	7.32	0.361333	0.180516		1209_20H	4.86	3.54	13.17	1.47	3.97	0.111617	0.0460973
690	7.6	7.02	39.58	25.47	68.78	0.643507	0.12988		690	9.1	6.96	49.2	24.62	66.49	0.500407	0.106667		690	5.04	4.92	18.67	4.93	13.31	0.26406	0.0771769		1209_20H	6.73	5.7	29.91	4.44	11.98	0.148445	0.0387811
690	9.57	8.32	60.38	40.3	108.82	0.66744	0.116184		690	5.34	3.93	16.27	6.77	18.27	0.416103	0.15677		690	5.93	4.62	21.26	6.63	17.91	0.311853	0.100041		1209_20H	4.94	4.53	17.1	4.67	12.61	0.273099	0.0879822
690	8.17	6.25	39.43	24.13	65.16	0.611971	0.144403		690	5.56	4.82	23.41	11.21	30.26	0.478855	0.165744		690	5.83	4.28	19.09	9.2	24.84	0.481928	0.164525		1209_20H	5.76	3.91	16.55	3.04	8.22	0.183686	0.0659324
690	7.2	5	31.97	18.23	49.23	0.570222	0.193426		690	5.79	4.27	20.09	9.26	25	0.460926	0.167524		690	3.8	2.9	8.45	2.07	5.59	0.24497	0.123706		1209_20H	6.73	3.03	14.88	2.56	6.92	0.172043	0.07913
690	16.12	12.77	161.04	120.65	325.76	0.749193	0.087656		690	4.7	4	14.58	3.52	9.5	0.241427	0.0893977		690	5.13	4.21	16.83	4.77	12.87	0.283422	0.100193		1209_20H	5.18	3.46	13.76	2.12	5.74	0.15407	0.0652913
690	5.91	5.13	23.59	10.44	28.18	0.44256	0.128198		690	6.98	5.06	27.6	14.72	39.75	0.533333	0.157309		690	5.29	3.94	16.13	8.94	24.13	0.554247	0.207917		1209_20H	4.73	4.22	14.28	2.3	6.2	0.161064	0.0521487
690	5.26	4.67	18.61	6.28	16.95	0.337453	0.104554		690	6.69	5.56	28.63	14.66	39.58	0.51205	0.135382		690	5.93	4.25	19.58	8.51	22.97	0.434627	0.151739		1209_20H	5.87	4.33	14.26	3.14	8.48	0.220196	0.05449
690	6.02	4.06	18.94	5.7	15.39	0.30095	0.109705		690	5.07	3.77	14.68	5.3	14.31	0.361035	0.140471		690	4.91	2.99	11.42	5.03	13.59	0.440455	0.218849		1209_20H	4.58	3.68	11.95	2.34	6.32	0.195816	0.0720537
762	6.38	6.1	29.04	18.47	49.88	0.636019	0.148589		690	5.36	3.89	16.15	6.66	17.99	0.412384	0.156824		690	6.45	5.08	25.78	6.39	17.24	0.247867	0.0733188		1209_20H	4.68	3.5	12.71	2.17	5.85	0.170732	0.0722902
762	7.81	7.24	43.64	27.45	74.11	0.62901	0.128061		690	8.54	6.54	42.55	19.06	51.45	0.447944	0.0996577		690	3.96	3.3	9.86	1.96	5.29	0.198783	0.0868029		1209_20H	5.48	4.05	16.97	2.37	6.39	0.139658	0.0503569
762	4.59	4.21	14.96	6.59	17.79	0.440508	0.154707		690	6.7	5.95	31.01	13.32	35.97	0.429539	0.10725		690	4.25	3.28	10.75	2.06	5.56	0.191628	0.0860463		1209_20H	4.63	3.88	13.73	3.47	9.37	0.252731	0.0950794
762	10.32	7.06	56.22	19.36	52.26	0.344361	0.0718816		690	6.77	5.83	30.75	9.57	25.83	0.31122	0.0794305		690	5.84	4.09	18.66	6.41	17.32	0.343516	0.125314		1209_20H	5.52	4.43	18.42	6.32	17.06	0.343105	0.111422
762	5.78	4	17.32	4.77	12.88	0.275404	0.0985081		690	5	4.13	13.7	3.27	8.84	0.238686	0.0732283		690	3.97	3.73	11.6	2.79	7.54	0.240517	0.0964711		1209_20H	4.68	4.61	16.37	7.88	21.29	0.481368	0.151314
762	10.48	6.58	53.4	22.62	61.08	0.423596	0.0952096		690	6.04	5.56	27.43	11.59	31.3	0.42253	0.118549		690	4.44	3.97	14.4	4.25	11.47	0.295139	0.115992		1209_20H	5.1	4.8	18.93	5.23	14.12	0.276281	0.0850062
762	9.61	7.48	56	34.59	93.39	0.617679	0.122864		690	8.49	6.96	46.38	30.68	82.82	0.661492	0.142472		690	6.31	4.45	21.08	11.34	30.62	0.537951	0.173327		1209_20H	6.07	4.46	19.14	8.52	23	0.445141	0.134767
762	7.02	5.07	27.69	15.25	41.18	0.55074	0.161405		690	7.58	5.44	32.07	22.84	61.65	0.712192	0.19446		690	4.09	3.85	12.11	5.26	14.19	0.434352	0.165708		1209_20H	3.8	3.33	9.52	2.2	5.93	0.231092	0.099713
762	7.26	5.55	32.5	12.09	32.65	0.372	0.103254		690	7.4	5.95	34.18	20.83	56.24	0.609421	0.151854		690	4.09	3.28	10.5	4.01	10.81	0.381905	0.17405		1209_20H	4.69	4.13	15.05	3.04	8.21	0.201993	0.0725775
762	7.05	6.51	35.18	17.94	48.43	0.509949	0.114676		690	8.39	7.22	47.12	32.55	87.9	0.690789	0.14214		690	3.78	3.44	9.98	4.99	13.48	0.5	0.213056		1209_20H	6.72	4.37	15.55	3.11	8.39	0.2	0.0462839
762	8.92	7.15	49.12	29.64	80.02	0.60342	0.124137		690	5.72	5.05	22.47	11.33	30.6	0.504228	0.148338		690	6.46	3.21	15.67	5.58	15.05	0.356094	0.160101		1209_20H	4.81	2.72	9.72	3.59	9.7	0.369342	0.192669
762	9.66	8.24	61.1	34.24	92.46	0.560393	0.0997019		690	5.9	4.75	21.75	11.12	30.02	0.511264	0.159539		690	4.87	3.52	13.35	5.87	15.84	0.4397	0.185791		1209_20H	5.43	3.95	15.27	4.73	12.78	0.309758	0.106627
762	8.07	7.1	43.83	21.83	58.93	0.498061	0.102486		690	7.07	5.86	35.03	27.84	75.17	0.794747	0.219006		690	3.5	2.92	7.93	2.99	8.08	0.377049	0.191355		1209_20H	5.75	4.72	19.94	10.56	28.5	0.529589	0.157439
762	9.91	7.26	55.03	37.88	102.26	0.688352	0.138505		690	8.05	5.68	35.5	21.58	58.26	0.607887	0.158694		690	5.73	4.9	21.65	6.87	18.55	0.317321	0.0953699		1209_20H	6.39	3.69	17.52	5.67	15.31	0.32363	0.12446
762	9.97	7	52.39	18.87	50.95	0.360183	0.0737704		690	6.32	5.24	27	18.02	48.66	0.667407	0.198325		690	4.43	3.39	11.52	5.98	16.15	0.519097	0.224336		1209_20H	4.47	3.99	14.12	5.3	14.32	0.375354	0.142241
762	9.75	6.32	47.64	31.98	86.35	0.671285	0.156834		690	8.58	5.89	38.89	26.63	71.9	0.684752	0.170866		690	6.37	5.28	26.46	13.27	35.82	0.501512	0.142713		1209_20H	4.09	2.64	8.13	3.81	10.3	0.468635	0.255267
762	5.86	4.72	21.4	11.39	30.75	0.532243	0.166626		690	8.56	6.56	43.27	22.13	59.76	0.51144	0.114736		690	8.25	5.67	35.81	20.43	55.16	0.570511	0.147113		1209_20H	4.69	3.6	12.36	4.98	13.45	0.402913	0.156478
762	7.51	4.69	26.85	12.99	35.07	0.483799	0.150184		690	7.5	5.9	33.92	15.76	42.56	0.464623	0.11529		690	6.87	5.85	31.03	13.73	37.06	0.442475	0.111533		1209_20H	4.29	3.49	11.36	3.8	10.27	0.334507	0.138892
762	11.09	7.44	42.69	17.83	48.13	0.417662	0.0554722		690	7.26	5.04	28.55	12.08	32.61	0.423117	0.125104		690	5.64	4.59	20.21	8.25	22.28	0.408214	0.132602		1209_20H	3.76	3.03	9.34	4.7	12.68	0.503212	0.260032
762	7.86	6.78	41.25	21.28	57.46	0.515879	0.112484		690	5.26	3.57	14.3	3.81	10.29	0.266434	0.108544		690	6.69	5.81	31.93	15.9	42.92	0.497964	0.134468		1209_20H	4.76	4.28	15.76	7.43	20.05	0.471447	0.162741
762	8.67	6.98	47.24	29.15	78.7	0.617062	0.131798		690	4.97	4.58	17.44	6.88	18.58	0.394495	0.126038		690	7.34	6.4	37.07	18.07	48.8	0.487456	0.11479		1209_20H	4.94	3.88	14.89	3.24	8.75	0.217596	0.0832063
762	5.99	5.57	25.31	13.91	37.55	0.549585	0.142952		690	6.6	6.15	31.39	11.76	31.74	0.374642	0.0899735		690	6.24	5.65	27.4	11.2	30.25	0.408759	0.107384		1209_20H	4.54	3.95	12.36	4.39	11.84	0.355178	0.118363
762	6.87	5.27	27.8	13.36	36.08	0.480576	0.13373		690	6.18	5.91	28.28	10.96	29.59	0.387553	0.0969725		690	5.61	4.28	18.72	6.6	17.81	0.352564	0.122658		1209_21H	5.38	3.95	9.13	2.47	6.66	0.270537	0.0561981
762	10.18	6.64	52.71	18.33	49.48	0.347752	0.0779974		690	7.31	6.72	38.44	14.01	37.82	0.364464	0.0810557		690	7.43	5.61	32.58	9.33	25.18	0.286372	0.0762024		1209_21H	4.68	3.79	13.7	3.14	8.48	0.229197	0.0892086
865	7.14	6.39	35.27	26.11	70.49	0.740289	0.171044		690	6.78	5.93	31.46	17.81	48.07	0.566116	0.142668		690	4.05	2.77	8.68	4.03	10.89	0.464286	0.247681		1209_21H	7.03	6.3	34.68	15.46	41.75	0.44579	0.105822
865	10.4	9.05	73.41	17.49	47.23	0.238251	0.0392158		690	5.39	3.6	15	5.82	15.71	0.388	0.159122		690	12.92	9.7	97.14	49.32	133.16	0.507721	0.0774851		1209_21H	7.14	6.11	33.71	19.1	51.56	0.566597	0.136853
865	7.89	5.79	35.64	8.65	23.36	0.242705	0.0624573		690	5.41	4.42	18.57	7	18.9	0.376952	0.12649		690	7.71	6.25	37.19	24.43	65.95	0.656897	0.154921		1209_21H	6.65	6.15	31.64	23.31	62.93	0.736726	0.176999
865	6.39	5.57	27.24	14.92	40.28	0.547724	0.143734		690	7.62	6.03	35.76	14.88	40.18	0.416107	0.102569		690	7.61	6.39	37.85	13.68	36.93	0.361427	0.0840816		1209_21H	4.49	3.76	13.1	6.96	18.78	0.531298	0.209406
865	7.22	6.25	34.18	23.43	63.27	0.685489	0.158663		690	6.37	5.14	25.5	12.51	33.77	0.490588	0.141969		690	4.23	2.72	8.83	2.02	5.44	0.228766	0.123275		1209_21H	5.67	4.05	17.33	6.18	16.7	0.356607	0.12691
865	7.34	6.06	34.41	17.09	46.15	0.496658	0.121088		690	6.46	5.35	26.66	6.14	16.57	0.230308	0.0634205		690	5.34	3.64	14.96	5.19	14.02	0.346925	0.140096		1209_21H	6.08	4.53	16.1	4.28	11.56	0.265839	0.0655157
865	7.61	6.95	41.03	23.72	64.05	0.578114	0.123243		690	4.32	3.19	10.73	2.33	6.29	0.217148	0.101226		690	6.27	5.19	24.77	7.99	21.58	0.322568	0.0903537		1209_21H	5.95	5.02	22.94	9.4	25.38	0.409765	0.119731
865	10.12	6.14	25.18	10.42	28.15	0.41382	0.0521617		690	6.78	5.99	31.51	13.35	36.04	0.423675	0.104809		690	5.62	2.93	12.1	3.2	8.64	0.264463	0.126672		1209_21H	6.84	5.87	31.06	14.69	39.66	0.472956	0.119039
865	9.23	6.83	47.03	18.66	50.38	0.396768	0.0827694		690	7.69	6.19	34.39	15.98	43.14	0.46467	0.103579		690	6.08	4.78	22.53	10.35	27.94	0.459387	0.142293		1209_21H	4.22	3.98	13.36	7.55	20.39	0.56512	0.21571
865	7.95	6.73	41.52	25.37	68.5	0.611031	0.134563		690	6.32	5.45	27.66	8.14	21.98	0.294288	0.0828163		690	6.86	5.41	28.44	7.97	21.51	0.280239	0.0758125		1209_21H	5.29	5.12	20.85	8.69	23.47	0.416787	0.119681
883	9.09	7.84	54.88	39.12	105.62	0.712828	0.133722		690	5.26	4.24	17.4	6.48	17.5	0.372414	0.130876		690	4.43	3.6	11.96	3.18	8.58	0.265886	0.105784		1209_21H	6.79	5.84	30.5	22.59	61	0.740656	0.186304
883	10.61	7.98	66.1	70.4	190.09	1.06505	0.199		690	5.8	3.97	17.68	4.8	12.96	0.271493	0.100284		762	5.16	3.89	15.59	7.36	19.88	0.472097	0.180024		1209_21H	6.67	5.26	27.4	20.74	55.99	0.756934	0.214641
883	7.89	6.61	40.68	30.37	82	0.746559	0.168254		690	6.55	5.45	27.77	11.2	30.24	0.403313	0.109947		762	5.09	4.04	15.82	7.93	21.42	0.501264	0.182303		1209_21H	5.5	4.77	20.33	6.16	16.62	0.303	0.0940119
883	6.51	5.71	29.01	18.86	50.92	0.650121	0.169703		690	3.96	3.8	11.66	4.64	12.52	0.397942	0.154973		762	4.3	3.13	9.91	4.26	11.5	0.429869	0.193132		1209_21H	4.97	4.53	17.56	5.79	15.65	0.329727	0.108424
929	8.63	6.29	42.18	15.56	42.01	0.368895	0.087036		690	8.41	6.35	41.77	27.21	73.46	0.651424	0.153245		762	5.72	4.84	21.37	10.7	28.88	0.500702	0.15251		1209_21H	5.69	5.61	24.56	7.99	21.57	0.325326	0.0852138
929	9.04	6.1	40.39	15.07	40.69	0.373112	0.0855631		690	5.8	5.57	25.1	15.18	41	0.604781	0.161115		762	6.56	5.74	29.09	17.46	47.13	0.600206	0.154283		1209_21H	6.54	5.87	29.53	9.08	24.52	0.307484	0.0769544
929	11.67	10.65	96.95	47.87	129.25	0.49376	0.0690708		690	5.97	5.15	23.56	15.47	41.77	0.656621	0.186596		762	4.66	3.16	11.28	5.47	14.76	0.484929	0.224506		1209_21H	5.67	4.49	19.24	4.57	12.35	0.237526	0.0763558
929	8.88	5.81	39.31	16.17	43.66	0.411346	0.103026		690	7.31	5.86	33.16	11.4	30.78	0.343788	0.0867348		762	4.8	3.93	14.15	6.4	17.27	0.452297	0.164875		1209_21H	7.74	5.76	34.74	21.82	58.9	0.628094	0.162282
929	9.88	6.6	50.76	14.49	39.13	0.285461	0.0643021		690	4.28	3.81	13.19	4.49	12.12	0.340409	0.138024		762	8.2	4.83	30.22	14.44	38.99	0.477829	0.144165		1209_21H	4.51	4.05	14.21	3.59	9.68	0.252639	0.092685
929	7.79	5.27	29.78	10.5	28.36	0.352586	0.0926898		690	7.24	5.43	29.81	15.68	42.33	0.525998	0.140284		762	5.73	4.89	21.34	11.71	31.61	0.548735	0.163225		1209_21H	6.17	3.96	10.46	2.9	7.83	0.277247	0.0572432
929	7.37	4.53	25.91	8.89	24	0.343111	0.112264		690	8.66	7.65	49.44	31.51	85.08	0.637338	0.118743		762	5.22	3.85	14.71	6.83	18.44	0.46431	0.168589		1209_21H	4.98	3.95	15.3	4.49	12.13	0.293464	0.110363
929	12.53	8.69	85.22	43.07	116.28	0.505398	0.0869332		690	7.05	6.43	34.97	18.7	50.5	0.534744	0.122527		762	6.16	3.93	18.19	7.56	20.4	0.415613	0.15176		1257	4.86	4.51	17.04	5.89	15.91	0.345657	0.113796
929	8.64	6	36.19	12.66	34.17	0.34982	0.0777354		690	5.81	4.74	21.24	13.51	36.48	0.636064	0.197662		762	6.39	4.21	20.49	11.31	30.54	0.551977	0.190721		1257	4.9	4.3	16.37	2.87	7.75	0.175321	0.0604993
929	7.73	6.82	41.05	27.89	75.3	0.679415	0.14815		690	7.02	5.56	29.89	11.36	30.68	0.38006	0.0999754		762	6.97	6.21	33.26	19.63	53.01	0.590198	0.139478		1257	4.61	3.8	13.5	4.39	11.84	0.325185	0.12595
1051	5.57	4.59	19.51	5.35	14.45	0.274218	0.0870712		690	5.5	4.12	17.34	6.66	17.98	0.384083	0.136244		762	4.46	4.35	14.27	5.76	15.54	0.403644	0.13035		1257	4.98	4.19	15.99	5.51	14.87	0.34459	0.120364
1051	8.56	6.54	43.65	21.37	57.69	0.489576	0.111475		690	6.25	5.29	26.02	10.08	27.2	0.387394	0.11007		762	6.09	3.72	16.42	5.17	13.97	0.31486	0.117163		1257	4.86	4.14	15.14	5.79	15.64	0.382431	0.132753
1051	7.75	6.78	38.41	20.29	54.78	0.528248	0.108773		690	7.81	5.87	35.19	14.99	40.47	0.425973	0.106384		762	5.79	3.84	17.2	7.53	20.32	0.437791	0.168444		1257	5.21	4.41	17.48	5.1	13.76	0.291762	0.0961295
1051	6.52	5.08	25.39	16.38	44.21	0.645136	0.185926		690	5.68	4.95	22.02	9.53	25.72	0.432788	0.130778		762	5.81	2.35	8.74	2.92	7.87	0.334096	0.173809		1257	5.77	5.26	23.3	9.99	26.99	0.428755	0.119514
1051	6.75	4.43	22.89	14.8	39.97	0.646571	0.213379		690	5.04	4.68	18.32	5.69	15.37	0.31059	0.0984445		762	10.33	6.16	47.7	9.94	26.84	0.208386	0.0484313		1257	5.83	4.14	17.3	7.88	21.28	0.455491	0.150612
1051	8.41	7.33	47.85	26.52	71.61	0.554232	0.112091		690	8.65	6.81	45.9	19.8	53.45	0.431373	0.0942663		762	10.07	7.47	58.11	14.45	39.01	0.248666	0.0491132		1257	5.01	4.45	16.35	8.23	22.23	0.503364	0.158432
1051	12.28	11.05	105.61	96.14	259.57	0.91033	0.122457		690	6.89	5.7	30.66	12.07	32.6	0.393673	0.102977		762	6.04	4.49	20.68	9.74	26.28	0.470986	0.152767		1257	4.3	3.8	12.65	4.34	11.72	0.343083	0.133492
1051	6.99	5.73	30.8	24.11	65.09	0.782792	0.200638		690	7.38	5.87	33.4	10.07	27.18	0.301497	0.0756307		762	5.6	4.09	17.79	7.06	19.06	0.396852	0.143937		1331	4.91	4.06	15.55	3.31	8.92	0.212862	0.0781081
1051	11.17	9.48	82.53	71.97	194.32	0.872047	0.136925		690	6.4	5.77	28.77	12.1	32.66	0.420577	0.108456		762	4.52	3.51	12.11	5.67	15.32	0.468208	0.194461		1331	6.62	6.08	31.38	12.16	32.84	0.387508	0.0949008
1051	7.98	4.95	30.57	12.21	32.96	0.399411	0.119262		690	6.22	5.01	24.27	15.36	41.48	0.63288	0.1879		762	6.8	4.29	20.51	7.1	19.17	0.346173	0.108352		1331	6.62	5.15	26.46	9.78	26.41	0.369615	0.106382
1051	8.83	7.23	49.07	35.9	96.92	0.731608	0.148545		690	6.47	4.96	24.48	9.93	26.8	0.405637	0.119147		762	6.74	5.3	26.66	12.38	33.42	0.464366	0.124885		1331	6.17	5.22	26.73	9.52	25.7	0.356154	0.108146
1051	7.81	5.92	35.46	26.97	72.82	0.760575	0.188186		690	5.9	4.3	19.67	5.61	15.15	0.285206	0.0982144		762	6.62	6.09	31.46	17.13	46.25	0.544501	0.13325		1331	5.81	5.58	24.97	7.87	21.25	0.315178	0.0830867
1051	8.52	7.05	45.97	37.99	102.57	0.826409	0.171338		690	6.7	5.97	29.58	16.86	45.53	0.56998	0.134845		762	7.03	5.28	28.5	16.44	44.38	0.576842	0.160206		1331	6.19	4.54	11.24	3.58	9.68	0.318505	0.0535898
1051	10.52	8.88	73.93	71.38	192.72	0.965508	0.164337		690	4.54	4.47	15.72	7.16	19.33	0.455471	0.150745		762	7.38	4.92	27.54	13.59	36.68	0.493464	0.14529		1331	6.02	4.05	7.59	2.26	6.09	0.29776	0.0437123
1209_20H	9.42	7.97	57.79	28.33	76.49	0.490223	0.0904233		690	7.88	6.19	36.9	20.62	55.68	0.558808	0.130432		762	9.08	4.79	18.45	6.73	18.16	0.36477	0.0616964		1331	4.81	4.17	15.22	3.47	9.37	0.227989	0.0792344
1209_20H	8.66	8.03	53.95	33.99	91.77	0.630028	0.116253		690	8.61	6.85	45.73	24.2	65.34	0.529193	0.114402		762	4.1	3.19	10.23	3.96	10.68	0.387097	0.181272		1331	7.98	6.47	40.46	14.03	37.89	0.346762	0.0802135
1209_20H	5.39	3.95	16.23	4.19	11.31	0.258164	0.0951552		690	7.17	6.19	33.86	24.22	65.38	0.715298	0.168374		762	4.88	3.93	14.74	6.37	17.21	0.432157	0.161412		1331	7.63	5.62	33.56	9.94	26.83	0.296186	0.0787754
1209_20H	4.89	3.58	13.49	2.74	7.4	0.203113	0.0834982		690	6.04	4.32	19.66	10.55	28.49	0.536623	0.178751		762	5.39	4.55	18.86	8.57	23.13	0.454401	0.14668		1331	8.38	7.78	50.34	20.54	55.46	0.408025	0.077339
1209_20H	5.36	4.14	16.52	5.04	13.6	0.305085	0.104777		690	5.15	4.07	12.97	2.75	7.43	0.212028	0.0615656		762	5.6	4.31	18.78	9.39	25.34	0.5	0.172395		1331	7.57	6.47	37.1	12.87	34.75	0.3469	0.0775667
1209_20H	12.33	10.13	97.34	79.97	215.93	0.821553	0.120711		690	4.69	3.3	11.98	2.81	7.59	0.234558	0.105077		762	5.17	3.56	14.18	4.64	12.54	0.327221	0.135247		1331	6.41	4.05	13.68	3.5	9.44	0.255848	0.0635772
1209_20H	11.6	10.26	91.62	66.84	180.46	0.729535	0.104541		690	5.12	3.92	15.6	4.12	11.11	0.264103	0.100013		762	6.38	5.12	24.78	13.07	35.29	0.527441	0.149251		1331	8.5	6.15	38.9	5	13.5	0.128535	0.0297031
1209_20H	6.39	4.82	23.75	7.09	19.15	0.298526	0.0912121		690	4.87	3.24	7.78	1.44	3.88	0.18509	0.0537954		762	5.3	4.5	18.46	6.57	17.73	0.355905	0.116914		1331	7.7	5.69	34.22	9.33	25.2	0.272648	0.0714772
1209_20H	12.78	10.45	104.34	62.12	167.71	0.595361	0.0850099		690	5.89	5.44	24.9	14.18	38.28	0.569478	0.155369		762	5.66	4.6	20.34	10.44	28.18	0.513274	0.166483		1331	5.41	4.85	20.55	5.35	14.45	0.260341	0.0802924
1209_20H	6.54	5.44	27.73	8.83	23.84	0.318428	0.0871338		690	7.48	6.82	39.89	23.72	64.04	0.594635	0.13021		762	5.07	3.59	13.9	6.27	16.92	0.451079	0.183262		1331	8.02	6.56	40.99	20.06	54.17	0.489388	0.111007
1209_20H	5.1	4.5	17.36	9.69	26.16	0.55818	0.179197		690	7.2	5.74	29.4	16.57	44.74	0.563605	0.133404		762	6.14	4.74	22.54	12.18	32.89	0.540373	0.168626		1331	5.98	3.95	9.78	2.67	7.2	0.273006	0.0546534
1209_20H	6.17	4.08	19.45	9.24	24.94	0.475064	0.171818		690	8.07	6.17	38.3	22.97	62.02	0.599739	0.142797		762	6.21	4.8	23.25	10.53	28.42	0.452903	0.140558		1331	7.01	6.54	35.73	17.28	46.67	0.483627	0.110071
1209_20H	6.5	5.3	26.68	13.85	37.39	0.519115	0.144873		690	5.24	4.61	18.06	11.19	30.2	0.619601	0.19191		762	5.72	5.5	22.39	9.55	25.77	0.42653	0.10541		1331	9.3	7.94	57.9	21.97	59.31	0.379447	0.0715661
1209_20H	8.06	5.52	34.59	10.92	29.48	0.315698	0.0849202		690	5.47	4.37	18.48	5.01	13.52	0.271104	0.0915986		762	6.53	5.03	25.26	13.08	35.31	0.517815	0.151203		1331	9.65	7.83	57.69	21.72	58.65	0.376495	0.0701149
1209_20H	10.04	7.96	61.43	20.24	54.66	0.329481	0.0607648		690	6.21	5.66	27.39	13.7	37	0.500183	0.131522		762	6.12	3.82	18.26	7.72	20.84	0.422782	0.165098		1331	8.45	6.79	44.25	14.77	39.88	0.333785	0.0724078
1209_20H	11.32	10.4	93.17	84.09	227.03	0.902544	0.131169		690	5.43	3.77	15.36	8.65	23.34	0.563151	0.21406		762	5.54	3.52	14.97	5.94	16.03	0.396794	0.16527		1331	9.84	7.57	55.98	23	62.09	0.410861	0.0779009
1209_20H	5.95	4.79	22.15	8.14	21.99	0.367494	0.113877		690	7.02	5.78	29.17	12.67	34.22	0.43435	0.103178		762	5.75	5.18	23.2	9.57	25.83	0.4125	0.118464		1331	8.12	6.81	43.17	16.05	43.32	0.371786	0.0814003
1209_20H	7.06	5.8	32.3	17.96	48.48	0.556037	0.144427		690	6.15	5.34	25.46	18.41	49.71	0.723095	0.200492		762	7.04	4.93	26.84	6.23	16.82	0.232116	0.0695381		1331	6.95	6.16	33.33	9.28	25.05	0.278428	0.0672052
1209_20H	6.21	4.31	20.65	9.47	25.58	0.458596	0.156785		690	7.38	6.57	37.51	23.02	62.15	0.613703	0.138013		762	6.13	4.18	19.49	9.2	24.85	0.472037	0.16405		1331	6.54	5.92	29.87	12.18	32.88	0.407767	0.101491
1209_20H	8.06	4.45	27.05	7.97	21.51	0.29464	0.0953684		690	6.59	6.02	30.99	15.71	42.41	0.506938	0.125632		762	5.75	4.37	19.53	9.53	25.73	0.487967	0.165754		1331	6.86	6	31.89	9.71	26.22	0.304484	0.0750921
1209_20H	9.01	6.84	44.69	21.22	57.29	0.474827	0.0961412		690	6.38	4.05	19.15	8.64	23.34	0.451175	0.157683		762	6.56	4.91	24.8	13.06	35.26	0.526613	0.157717		1331	8.19	5.56	34.4	13.28	35.86	0.386047	0.100177
1209_20H	5.79	5.15	23.45	10.69	28.85	0.455864	0.132949		690	7.25	6.76	37.56	25.55	68.99	0.680245	0.147286		762	6.7	3.8	19.67	8.23	22.21	0.418404	0.162465		1331	7.18	4.88	26.2	11.54	31.15	0.440458	0.128897
1209_20H	7.39	5.1	28.33	14.34	38.72	0.506177	0.142484		690	7.61	5.76	34.14	18.76	50.64	0.549502	0.141907		865	9.72	6.64	32.54	14.05	37.94	0.431776	0.0626146		1331	5.16	3.93	15.84	3.49	9.43	0.220328	0.0836358
1209_20H	12.32	9.3	96.29	60.49	163.32	0.628206	0.10842		690	6.24	5.2	26.35	14.79	39.95	0.56129	0.167409		865	6.44	5.96	29.68	17.77	47.98	0.59872	0.148358		1331	5.65	5.18	22.72	7.65	20.64	0.336708	0.0963729
1209_20H	7.77	6.83	38.77	28.14	75.97	0.725819	0.148273		690	5.28	5.19	20.81	11.05	29.85	0.530995	0.148387		865	6.27	4.35	12.87	5.2	14.03	0.40404	0.0837064		1331	6.46	5.92	29.4	12.27	33.13	0.417347	0.103507
1209_20H	5.9	4.77	17	8.49	22.92	0.499412	0.120787		690	6.44	5.5	27.2	15.6	42.13	0.573529	0.152938		865	5.64	4	17.09	8.53	23.02	0.499122	0.180531		1331	6.85	6.28	32.79	14.39	38.87	0.438853	0.101731
1209_21H	7.93	5.97	36.67	22.93	61.91	0.625307	0.154947		690	6.82	5.45	29.09	15.29	41.27	0.52561	0.144156		865	5.07	4.02	15.16	6.43	17.36	0.424142	0.149883		1331	5.84	4.36	16.54	4.94	13.34	0.29867	0.084985
1209_21H	10.08	9.66	75.59	61.75	166.71	0.816907	0.125379		690	4.59	4.4	15.66	7.83	21.15	0.5	0.168285		865	5.23	3.08	12.08	5.33	14.4	0.441225	0.205175		1331	4.58	4.21	14.74	12.77	34.48	0.86635	0.300443
1209_21H	7.8	6.33	37.93	27.02	72.94	0.712365	0.165114		690	7.65	6.43	37.79	21.02	56.75	0.556232	0.126926		865	4.36	3.42	11.49	10.15	27.41	0.883377	0.380127		1331	7.27	5.7	32.43	9.56	25.82	0.294789	0.0772992
1209_21H	7.87	5.9	34.9	19.05	51.43	0.545845	0.132806		690	8.1	6.17	38.67	22.5	60.75	0.581846	0.139357		865	5.41	4.02	16.87	8.77	23.69	0.519858	0.191581		1331	6.2	4.58	17.47	4.62	12.46	0.264453	0.0678454
1209_21H	6.32	4.83	21.83	14.2	38.33	0.650481	0.183941		690	7.55	6.78	39.54	23.91	64.55	0.604704	0.131575		865	5.81	4.06	18.33	10.38	28.03	0.566285	0.207		1331	5.8	5.27	23.55	8.52	23.01	0.361783	0.101016
1209_21H	7.96	7.54	45.97	31.89	86.11	0.693713	0.134586		690	4.36	2.4	7.77	1.51	4.06	0.194337	0.114834		883	4.67	2.92	10.59	5.13	13.84	0.484419	0.246057		1331	9.23	7.21	51.08	21.88	59.08	0.428348	0.0870916
1209_21H	9.68	7.61	56.83	30.03	81.08	0.528418	0.102309		690	5.25	3.81	15.33	5.36	14.47	0.349641	0.134325		883	4.74	3.25	11.76	6.11	16.5	0.519558	0.233076		1331	6.89	6.53	34.97	17.62	47.57	0.50386	0.114541
1209_21H	7.83	6.7	40.08	28.41	76.72	0.708832	0.154369		690	4.62	3.57	12.21	2.38	6.42	0.194922	0.0771969		883	9.27	3.8	23.34	10.62	28.67	0.455013	0.151523		1331	5.3	4.36	18.1	4.95	13.37	0.273481	0.0938335
1209_21H	5.46	4.52	18.17	7.85	21.2	0.432031	0.134401		690	8.1	7.19	45.47	30.88	83.37	0.679129	0.140843		883	4.77	3.85	14.15	7.88	21.29	0.55689	0.212857		1331	6.22	5.76	26.96	9.56	25.81	0.354599	0.0884757
1209_21H	7.17	4.98	26.8	12.69	34.28	0.473507	0.136297		690	7.6	5.36	31.78	13.41	36.22	0.421963	0.117297		883	5.57	3.84	16.1	7.33	19.8	0.45528	0.170446		Bass River	5.43	4.99	21.06	10.94	29.54	0.519468	0.154532
1209_21H	8.42	5.97	39.17	21.84	58.96	0.55757	0.138993		690	5.71	4.57	20.18	7.48	20.19	0.370664	0.119794		883	3.71	2.73	7.58	3.13	8.46	0.412929	0.216195		Bass River	4.1	3.51	11.01	3	8.09	0.27248	0.113429
1209_21H	6.02	5.52	25.9	18.4	49.69	0.710425	0.191578		690	4.68	3.84	13.74	5.79	15.63	0.421397	0.16024		883	3.75	3.13	9.01	4.23	11.42	0.469478	0.219898		Bass River	4.41	3.63	12.35	4.76	12.85	0.385425	0.156443
1209_21H	9.73	6.28	46.55	18.69	50.47	0.401504	0.0930205		690	4.45	3.34	11.51	2.37	6.4	0.205908	0.0911794		883	4.09	3.41	10.72	4.56	12.31	0.425373	0.183119		Bass River	5.61	4.18	17.91	9.02	24.35	0.503629	0.175749
1209_21H	5.96	4.88	22.46	11.7	31.58	0.520926	0.157435		690	6.12	4.21	19.92	5.61	15.15	0.281627	0.0987754		883	5.98	5.21	24.34	7.26	19.59	0.298274	0.0854204		Bass River	5.02	3.61	13.98	6.28	16.95	0.449213	0.183334
1209_21H	8.58	6.82	45.07	23.93	64.62	0.530952	0.114522		690	4.17	2.88	8.89	1.94	5.23	0.218223	0.107123		883	4.97	4.58	17.67	10.41	28.11	0.589134	0.190706		Bass River	4.23	2.9	9.45	3.24	8.74	0.342857	0.173944
1209_21H	7.87	6.57	40.45	35.45	95.71	0.876391	0.199302		690	6.84	5.36	28.09	10.17	27.45	0.362051	0.0988409		883	5.03	4.17	16.16	7.75	20.92	0.479579	0.169224		Bass River	5.44	3.8	15.48	4.84	13.07	0.312661	0.117674
1209_21H	6.02	4.57	21.16	11.54	31.17	0.545369	0.175299		690	7.2	6.12	34.18	15.92	42.97	0.465769	0.112748		883	5.18	3.18	12.52	4.05	10.92	0.323482	0.147663		Bass River	2.85	2.29	5.11	1.61	4.35	0.315068	0.205737
1209_21H	5.5	4.19	17.8	8.16	22.03	0.458427	0.161399		690	7.3	6.13	35.61	15.67	42.32	0.440045	0.1091		883	4.25	3.81	11.57	4.82	13.01	0.416595	0.149214		Bass River	4.79	3.51	12.84	4.04	10.9	0.314642	0.130747
1209_21H	6.7	4.65	24.24	6.68	18.03	0.275578	0.0880637		690	7.13	6.15	35.46	14.93	40.31	0.421038	0.105736		883	4.15	3.48	10.79	4.34	11.72	0.402224	0.164924		Bass River	5.91	3.97	17.17	6.24	16.85	0.363425	0.127943
1209_21H	6.64	4.97	25.54	16.35	44.16	0.640172	0.190387		690	6.66	5.6	29.21	11.65	31.46	0.398836	0.106531		883	5.92	3.86	17.37	7.52	20.31	0.43293	0.162826		Bass River	7.35	5.63	28.72	9.29	25.07	0.323468	0.0761575
1257	13.28	9.7	98.89	64.87	175.14	0.655981	0.0991525		690	4.77	3.88	14.52	2.68	7.24	0.184573	0.0712778		883	5.91	3.86	17.35	8.08	21.83	0.465706	0.175247		Bass River	4.54	3.83	13.29	6.67	18.01	0.501881	0.191282
1257	7.89	5.2	31.49	17.71	47.82	0.562401	0.158539		690	6.96	5.45	29.43	11.35	30.65	0.385661	0.104856		883	4.71	3.72	12.99	6.02	16.24	0.463433	0.176397
1257	8.43	6.58	43.07	25.68	69.33	0.596239	0.134375		690	5.41	4.69	19.14	6.89	18.59	0.359979	0.11058		883	4.52	3.08	10.47	5.79	15.64	0.553009	0.257893
1257	7.53	6.61	39.22	27.5	74.25	0.701173	0.159638		690	7.47	5.56	32	14.09	38.03	0.440312	0.116531		883	5.63	4.26	18.2	8.76	23.66	0.481319	0.163749
1257	7.23	5.95	33.21	23.17	62.56	0.697681	0.172884		690	4.56	3.58	12.91	2.43	6.56	0.188226	0.0794103		929	8.63	7.71	51.67	27.02	72.96	0.522934	0.100593
1257	8.52	5.96	39.31	27.72	74.85	0.705164	0.174929		690	7.07	6.69	39.64	17.05	46.05	0.430121	0.102909		929	6	5.21	24.2	9.57	25.84	0.395455	0.112224
1257	14.58	10.79	129.3	90.73	244.98	0.701701	0.102083		690	6.45	5.33	26.83	10.18	27.48	0.379426	0.106105		929	6.03	4.55	21.28	8.35	22.56	0.392387	0.127746
1257	14.69	12.53	143.16	133.89	361.51	0.935247	0.110873		690	5.57	4.63	20.01	10.83	29.23	0.541229	0.173226		929	5.51	3.88	16.44	5.92	15.98	0.360097	0.136304
1257	11.35	9.08	80.02	64.77	174.89	0.809423	0.132193		690	4.94	4.16	16.06	4.91	13.26	0.305729	0.109691		929	5.9	5.1	22.72	16.39	44.26	0.721391	0.20398
1257	13.34	10.56	110.84	88.82	239.82	0.801335	0.114032		762	6.14	4.76	22.41	8.19	22.12	0.365462	0.112435		929	5.65	5.1	22.3	7.5	20.25	0.336323	0.0974706
1257	8.64	7.7	51.68	22.63	61.1	0.437887	0.0843705		762	11.8	11.14	102.51	91.68	247.55	0.894352	0.11957		929	4.95	3.54	13.56	6.19	16.71	0.45649	0.190581
1257	4.94	4.22	16.08	9.87	26.65	0.613806	0.214273		762	8.16	5.77	36.47	34.04	91.92	0.93337	0.239304		929	4.9	4.03	15.21	8.54	23.07	0.561473	0.204952
1257	5.92	5.05	22.66	10.24	27.65	0.451898	0.129538		762	11.04	9.33	80.05	54.51	147.18	0.680949	0.108329		929	8.78	7.15	48.4	29.98	80.93	0.619421	0.127563
1257	5.37	4.83	20.14	13.33	36	0.661867	0.203218		762	8.28	7.89	50.87	22.58	60.97	0.443877	0.0836645		929	9.5	7.19	53.06	18.63	50.3	0.351112	0.0724491
1257	6.23	5.07	25.07	15.35	41.44	0.612286	0.183065		762	12.52	10.41	101.67	91.71	247.62	0.902036	0.129096		1051	6.51	5.19	26.36	15.09	40.75	0.572458	0.164352
1257	9.74	7.34	55.61	34.6	93.42	0.62219	0.125929		762	8.02	7.09	43.86	28.36	76.58	0.646603	0.134351		1051	4.16	2.95	9.61	2.85	7.69	0.296566	0.150352
1257	8.83	8.38	58.76	43.38	117.14	0.738257	0.133611		762	8.82	8.16	54.85	41.31	111.55	0.753145	0.134341		1051	4.68	3.96	14.11	5.78	15.6	0.409639	0.150416
1257	9.77	8.5	62.66	42.48	114.68	0.677944	0.114935		762	13.29	9.27	95.91	76.43	206.35	0.796893	0.127815		1051	5	3.84	14.65	6.24	16.84	0.425939	0.161642
1257	14.09	9.54	102.67	68.69	185.46	0.669037	0.102303		762	6.47	4.51	22.66	14.08	38.02	0.621359	0.204337		1051	3.66	2.37	6.52	1.99	5.38	0.305215	0.184874
1257	9.1	6.54	46.16	30.03	81.08	0.650563	0.147353		762	6.99	6.8	36.81	23.73	64.06	0.644662	0.140218		1051	3.34	3.15	8.17	3.76	10.15	0.46022	0.216681
1331	7.32	5.24	29.53	13.81	37.28	0.46766	0.131226		762	7.44	7.11	41.51	31.83	85.95	0.766803	0.161631		1051	4.93	3.31	12.5	4.21	11.37	0.3368	0.148861
1331	10.2	8.07	64.09	37.6	101.51	0.586675	0.108104		762	6.88	5.82	30.29	16.76	45.26	0.553318	0.137354		1051	4.59	3.46	11.54	4.49	12.12	0.389081	0.156057
1331	10.01	8.83	69.07	61.57	166.24	0.891415	0.150666		762	5.79	4.72	21.4	10.44	28.19	0.48785	0.154575		1051	5.28	3.7	14.69	3.82	10.31	0.260041	0.100932
1331	10.84	8.63	72.72	72.6	196.01	0.99835	0.171746		762	7.08	6.41	33.92	20.57	55.54	0.606427	0.135047		1051	3.82	3.32	9.68	3.16	8.53	0.326446	0.143334
1331	11.24	9.93	85.8	75.96	205.09	0.885315	0.130895		762	7.67	6.48	38.42	29.39	79.34	0.764966	0.174283		1051	4.99	3.71	13.33	6.01	16.23	0.450863	0.16712
1331	10.47	9.61	78.06	61.15	165.1	0.783372	0.120783		762	5.14	4.72	19.01	10.64	28.72	0.559705	0.177458		1051	3.15	2.32	5.7	1.13	3.05	0.198246	0.12729
1331	7.49	6.09	35.15	22.51	60.79	0.640398	0.154761		762	9.03	6.25	42.97	29.4	79.37	0.684198	0.159185		1051	4.99	3.81	14.55	6.62	17.87	0.454983	0.174546
1331	8.16	7.55	48.16	41.1	110.97	0.853405	0.168756		762	8.62	7.38	48.9	34.99	94.47	0.715542	0.142339		1051	6.33	3.88	18.72	8.74	23.6	0.46688	0.175164
1331	9.22	7.88	56.17	29.68	80.14	0.528396	0.0990107		762	5.62	4.21	18.14	8.64	23.31	0.476295	0.165659		1051	7.12	5.04	14.23	4.72	12.73	0.331694	0.0498428
1331	7.5	5.27	30.7	19.28	52.06	0.628013	0.176777		762	8.49	7.51	49.39	29.5	79.65	0.597287	0.117662		1051	4.01	3.51	7.21	2.37	6.41	0.32871	0.0916202
1331	9.64	9.14	68.79	52.58	141.96	0.764355	0.124696		762	7.2	6.05	33.17	23.98	64.75	0.722942	0.173783		1051	7.27	4.7	25.85	15.11	40.8	0.584526	0.179695
1331	9.64	9.13	68.81	47.3	127.72	0.6874	0.11242		762	6.6	4.81	24.61	11.85	32	0.481512	0.148213		1209_20H	7.43	5.04	27.47	11.18	30.18	0.406989	0.113134
1331	16.32	12.59	160.34	149.98	404.95	0.935387	0.110729		762	6.78	5.95	30.43	18.07	48.79	0.593822	0.143779		1209_20H	8.58	5.77	35.67	8.85	23.89	0.248108	0.0591706
1331	7.57	6.21	36.63	21.91	59.15	0.598144	0.143339		762	7.26	5.7	32.21	14.45	39.02	0.448618	0.116999		1209_20H	4.9	2.82	9.87	2.55	6.88	0.258359	0.124982
1331	15.88	12.82	158.64	160	432	1.00857	0.117083		762	6.26	5.25	24.76	11.16	30.12	0.450727	0.12353		1209_20H	7.39	5.04	26.86	10.45	28.21	0.389054	0.106319
1331	9.62	8.44	62.96	49.9	134.73	0.792567	0.139073		762	4.12	3.44	11.01	5.84	15.77	0.530427	0.228771		1209_20H	6.73	5.98	31.31	15.81	42.69	0.50495	0.125463
1331	10.93	8.96	76.23	72.88	196.78	0.956054	0.158626		762	6.87	5.24	27.76	11	29.71	0.396254	0.111372		1209_20H	6.26	5.2	24.51	12.74	34.39	0.519788	0.143744
1331	12.19	10.36	97.58	120.44	325.2	1.23427	0.175812		762	8.01	7.41	46.07	29.22	78.88	0.634252	0.126886		1209_20H	6.16	4.7	21.5	5.93	16.02	0.275814	0.08323
1331	10.69	9.61	79.75	68.85	185.89	0.863323	0.133193		762	5.85	4.79	21.72	12.05	32.54	0.554788	0.171459		1209_20H	5.59	4.51	18.74	5.7	15.4	0.304162	0.095744
1331	7.58	4.46	25.2	10.71	28.91	0.425	0.13566		762	6.23	4.09	19.84	8.87	23.94	0.447077	0.162551		1209_20H	6.59	4.48	22.54	10.71	28.93	0.475155	0.15465
1331	10.97	10.38	88.05	63.9	172.52	0.725724	0.103253		762	5.64	5.07	22.2	11.31	30.53	0.509459	0.148994		1209_20H	5.87	4.67	20.33	5.51	14.88	0.271028	0.0822018
1331	7.56	6.5	37.58	16.29	43.99	0.433475	0.0974034		762	7.62	6.99	41.44	22.81	61.58	0.550434	0.117008		1209_20H	6.04	4.98	23.33	8.82	23.81	0.378054	0.112454
1331	9.75	8.57	64.45	59.08	159.53	0.91668	0.157571		865	7.61	7.17	42.67	32.3	87.21	0.756972	0.157682		1209_20H	8.42	7.55	48.92	24.66	66.57	0.504088	0.098127
1331	7.33	5.46	29.84	14.98	40.46	0.502011	0.130925		865	7.08	6.03	33.1	23.53	63.52	0.710876	0.174564		1209_20H	10.54	8.48	67.9	38.39	103.65	0.56539	0.0967358
1331	8.33	6.37	40.2	25.4	68.57	0.631841	0.14352		865	8	6.15	38.11	45.34	122.43	1.18971	0.286182		1209_20H	4.4	2.88	9.81	3.13	8.45	0.319062	0.163798
1331	7.93	6.73	41.35	31.81	85.88	0.769287	0.169146		865	8.24	6.32	40.47	43.57	117.63	1.0766	0.252829		1209_20H	3.93	3.28	9.51	1.45	3.91	0.152471	0.0654982
1331	16.33	12.16	155.34	140.83	380.24	0.906592	0.111389		865	7.5	6.64	38.44	20.01	54.04	0.520552	0.115572		1209_20H	4.34	3.33	11.01	3.57	9.65	0.324251	0.141674
1331	9.76	8.79	66.15	55.64	150.24	0.841119	0.140916		865	7.96	6.46	39.6	31.7	85.59	0.800505	0.182256		1209_20H	5.66	2.44	9.21	1.9	5.14	0.206298	0.107686
1331	12.66	11.26	111.27	102.98	278.04	0.925497	0.12253		865	7.98	7.51	45.74	36.24	97.85	0.792304	0.153782		1209_20H	4.56	3.1	5.93	0.92	2.47	0.155143	0.040096
1331	10.88	7.65	63.94	62.22	167.99	0.9731	0.186629		865	8.65	6.89	46.14	18.17	49.06	0.393801	0.0845088		1209_20H	6.72	5.22	26.92	13.83	37.34	0.513744	0.144249
1331	10.61	8.97	73.39	64.53	174.24	0.879275	0.144365		865	7.34	6.7	38.28	45.5	122.85	1.18861	0.263735		1209_20H	6.38	4.81	23.92	11.17	30.17	0.466973	0.144525
1331	7.66	5.69	32.34	20.39	55.04	0.630489	0.157024		865	7.47	7.01	41.79	27.3	73.7	0.653266	0.142039		1209_20H	5.45	3.45	14.32	3.38	9.13	0.236034	0.0995138
1331	10.3	9.37	73.03	43.81	118.28	0.59989	0.0925248		865	10.2	9.23	73.13	62.92	169.89	0.860386	0.138289		1209_20H	5.73	5.01	22.32	4.14	11.17	0.185484	0.0549758
1331	10.13	7.09	54.65	36.34	98.12	0.664959	0.136296		865	8.32	6.87	43.79	39.84	107.57	0.909797	0.193769		1209_20H	5.26	3.94	15.86	7.16	19.34	0.45145	0.16747
1331	11.55	8.93	79.63	80.72	217.95	1.01369	0.167378		865	5.49	3.94	16.21	4.26	11.49	0.262801	0.0954654		1209_20H	6.11	4.79	22.71	12.06	32.55	0.531044	0.1643
Bass River	11.7	7.62	68.64	31.11	83.99	0.453234	0.0874592		865	4.71	4.07	14.81	6.63	17.89	0.44767	0.162295		1209_20H	5.76	4.4	11.89	2.32	6.26	0.195122	0.0397339
Bass River	6.6	4.79	24.66	17.56	47.41	0.712084	0.221468		865	7.52	5.27	30.02	26.51	71.58	0.883078	0.242422		1209_20H	5.59	4.44	16.66	4.77	12.89	0.286315	0.0826689
Bass River	6.29	4.7	22.86	12.14	32.78	0.531059	0.166868		865	4.64	3.59	12.5	5.39	14.55	0.4312	0.172141		1209_20H	6.57	5.38	26.5	16.33	44.1	0.616226	0.164005
Bass River	8.76	5.75	36.68	8.53	23.04	0.232552	0.0562485		865	6.44	5.87	28.74	23.36	63.08	0.812804	0.201054		1209_20H	7.11	4.34	23.26	9.61	25.96	0.413156	0.137049
Bass River	5.55	5.19	21.94	13.57	36.64	0.618505	0.173362		865	8.99	6.02	41.31	42.79	115.55	1.03583	0.250837		1209_20H	4.87	4.44	15.91	7.28	19.66	0.457574	0.144823
Bass River	4.42	3.73	12.94	4.06	10.97	0.313756	0.126092		865	5.48	4.48	18.98	15.5	41.85	0.816649	0.269151		1209_20H	7.89	4.63	26.77	11.34	30.61	0.423609	0.128049
Bass River	10.32	7.39	31.66	12.51	33.77	0.395136	0.0423926		865	8.07	6.84	43.08	30.17	81.47	0.700325	0.152613		1209_20H	8.76	7	47.9	21.72	58.65	0.453445	0.0966409
Bass River	6.45	5.4	27.25	18.38	49.63	0.674495	0.186638		865	7.15	5.43	30.16	22.02	59.44	0.730106	0.199486		1209_20H	7.27	4.96	27.93	14.53	39.23	0.520229	0.155156
Bass River	7.18	5.47	30.55	20.86	56.32	0.682815	0.185446		865	6.61	5.4	27.74	23.38	63.13	0.842826	0.231663		1209_20H	4.58	4.19	15	6.51	17.58	0.434	0.154628
Bass River	5.9	4.43	18.23	6.18	16.7	0.339002	0.101937		865	6.54	5.24	26.65	22.97	62.01	0.861914	0.244299		1209_20H	3.97	3.38	10.43	2.9	7.83	0.278044	0.122117
Bass River	7.28	4.74	26.58	12.97	35.02	0.487961	0.151444		865	5.65	4.61	20.11	8.27	22.32	0.411238	0.13154		1209_20H	8.82	5.84	39.16	15.97	43.12	0.407814	0.101394
Bass River	5.76	4.97	21.97	11.02	29.75	0.501593	0.147927		883	7.2	5.88	32.98	18.9	51.02	0.573075	0.145003		1209_20H	4.7	3.42	11.71	4.92	13.27	0.420154	0.170929
Bass River	7.74	6.75	40.51	25.84	69.78	0.637867	0.139941		883	6.21	5.82	28.27	18.43	49.77	0.651928	0.167336		1209_20H	4.13	3.89	12.43	4.76	12.86	0.382944	0.145465
Bass River	9.38	5.75	39.79	17	45.89	0.427243	0.104692		883	13.37	6.28	54.7	25.23	68.12	0.461243	0.0913835		1209_20H	3.51	2.76	7.85	3.92	10.58	0.499363	0.280003
Bass River	5.51	4.71	20.24	9.85	26.59	0.48666	0.153902		883	6.52	5.65	27.72	17.11	46.19	0.617244	0.157003		1209_20H	4.86	3.61	13.46	6	16.19	0.445765	0.180926
Bass River	6.25	4.11	19.82	9.74	26.3	0.491423	0.176196		883	6.78	5.28	27.65	16.85	45.5	0.609403	0.170257		1209_20H	5.88	3.87	17.77	10.93	29.5	0.615082	0.23704
Bass River	5.91	5.02	22.78	14.05	37.95	0.616769	0.18017		883	7.43	6.72	38.78	32.29	87.18	0.832646	0.183799		1209_20H	5.69	4.25	18.77	11.35	30.66	0.604688	0.210915
Bass River	6.31	4.71	22.63	11.2	30.23	0.494918	0.152809		883	11.29	8.34	68.69	40.77	110.07	0.593536	0.0991553		1209_20H	5.13	3.45	13.5	5.55	14.99	0.411111	0.173596
Bass River	8.83	6.39	44.06	28.82	77.81	0.654108	0.152663		883	6.48	5.6	28.39	21.55	58.19	0.75907	0.202534		1209_20H	6.87	5.36	28	20.1	54.27	0.717857	0.194496
Bass River	7.48	6.03	35.8	20.74	55.99	0.57933	0.145638		883	4.25	3.23	10.35	4	10.8	0.386473	0.172293		1209_20H	8.72	6.46	42.26	13.97	37.72	0.330573	0.073319
Bass River	10.84	9.47	80.99	49.49	133.63	0.611063	0.0972276		883	6.37	5.46	27.08	19.12	51.62	0.706056	0.192293		1209_20H	6.18	5.35	24.69	7.87	21.26	0.318753	0.0849728
									883	9.34	6.3	41.16	26.13	70.56	0.63484	0.134621		1209_20H	6.1	4.93	23.44	12.35	33.35	0.526877	0.159091
									883	8.77	7.2	47.65	28.15	76.01	0.590766	0.118254		1209_20H	5.76	4.58	20.44	11.25	30.36	0.550391	0.177828
									883	8.62	7.16	46.73	29.9	80.72	0.639846	0.129223		1209_20H	4.82	4.02	14.02	6.65	17.94	0.474322	0.163051
									883	4.68	3.89	13.95	7.33	19.79	0.525448	0.197679		1209_20H	4.47	4.12	14.33	6.1	16.47	0.42568	0.153543
									883	10.49	7.89	64.07	45.64	123.22	0.712346	0.13348		1209_20H	5.87	4.86	22.15	13.38	36.12	0.604063	0.184309
									883	5.47	4.24	14.82	6.26	16.91	0.422402	0.121578		1209_20H	6.35	4.76	23.17	16.29	43.98	0.703064	0.216239
									883	9.16	8	49.89	21.43	57.87	0.429545	0.0698149		1209_21H	5.8	4.71	21.44	8.06	21.76	0.375933	0.119637
									883	5.06	4.26	14.43	6.69	18.06	0.463617	0.139142		1209_21H	4.37	3.62	12.08	5.3	14.31	0.438742	0.176758
									883	5.76	4.91	21.85	12.02	32.46	0.550114	0.165318		1209_21H	5.95	3.72	16.6	7.14	19.27	0.43012	0.165614
									883	7.3	5.28	30.03	17.7	47.8	0.589411	0.166105		1209_21H	6.08	5.77	25.83	13.36	36.07	0.517228	0.126053
									883	9.32	6.77	49.15	30.57	82.54	0.621974	0.13668		1209_21H	4.47	3.75	12.98	6.18	16.69	0.476117	0.187767
									883	5.88	5.09	23.19	13.62	36.77	0.587322	0.170752		1209_21H	4.56	4.21	14.38	6.59	17.78	0.458275	0.155725
									929	9.52	8.86	65.37	28.28	76.35	0.432614	0.0722731		1209_21H	5	4.57	16.35	7.54	20.36	0.461162	0.137902
									929	5.55	5.15	22.27	9.76	26.35	0.438258	0.126632		1209_21H	5.56	4.17	16.26	7.86	21.21	0.483395	0.155266
									929	8.55	6.63	43.35	19.38	52.34	0.447059	0.0984832		1209_21H	9.18	7.35	52.26	31.24	84.34	0.59778	0.120308
									929	11.18	9.82	84.43	32.06	86.56	0.379723	0.0567937		1209_21H	6.3	5.86	28.68	16.14	43.59	0.562762	0.142485
									929	7.81	7.09	43.27	15.34	41.42	0.354518	0.0746248		1209_21H	4.16	3.81	12.2	4.89	13.2	0.40082	0.154656
									929	4.78	4.31	15.85	8.07	21.78	0.509148	0.173577		1209_21H	4.78	3.88	14.43	2.99	8.08	0.207207	0.0793563
									929	8.88	6.66	46.28	30.18	81.49	0.652118	0.146339		1209_21H	4.88	4.58	16.97	5.14	13.88	0.302887	0.0958989
									929	8.84	7.15	49.02	31.86	86.01	0.649939	0.134643		1209_21H	4.7	3.65	13.28	5.97	16.11	0.449548	0.182093
									929	7.91	5.63	34.7	20.26	54.71	0.583862	0.154329		1257	4.43	3.06	10.28	5.75	15.54	0.559339	0.264742
									929	9	7.79	54.78	38.69	104.45	0.70628	0.135295		1257	5.35	3.67	15.16	7.11	19.2	0.468997	0.188445
									929	10.97	9.38	79.02	51.52	139.11	0.651987	0.101945		1257	4.34	3.31	11.07	5.96	16.09	0.538392	0.239388
									929	5.2	4.43	17.56	8.41	22.71	0.478929	0.157393		1257	4.29	3.71	12.37	6.15	16.62	0.497171	0.198917
									1051	4.4	3.75	12.95	5.89	15.89	0.454826	0.181803		1257	9.66	6.8	49.17	34.12	92.13	0.693919	0.145887
									1051	3.51	2.47	6.81	4.11	11.1	0.603524	0.366558		1257	5.61	3.41	14.43	5.57	15.04	0.386001	0.163074
									1051	6.43	5.6	28.07	14.84	40.06	0.528678	0.140556		1257	5.76	3.75	16.65	8.35	22.54	0.501502	0.196881
									1051	4.45	3.6	11.88	4.06	10.96	0.341751	0.13445		1257	4.96	3.5	13.08	5.88	15.88	0.449541	0.184825
									1051	5.31	4.82	19.96	8.06	21.76	0.403808	0.124781		1257	4.38	3.99	13.67	5.01	13.53	0.366496	0.137221
									1051	4.6	3.79	13.56	5.5	14.86	0.405605	0.158975		1257	4.75	3.98	14.49	7.17	19.35	0.494824	0.181996
									1051	5.27	4.34	17.83	7.78	21.01	0.436343	0.149689		1257	5.14	4.11	16.43	9.3	25.1	0.566038	0.204568
									1051	8.82	5.58	36.3	15.22	41.1	0.419284	0.105847		1257	7.55	5.3	27.37	11.14	30.08	0.407015	0.10032
									1051	4.24	4.04	13.41	7.15	19.32	0.533184	0.197324		1257	3.8	3.04	8.69	3.79	10.24	0.436133	0.206115
									1051	3.54	3.2	8.85	4.86	13.12	0.549153	0.256056		1257	3.83	2.84	8.27	3.53	9.53	0.426844	0.218243
									1051	3.63	2.9	8.24	3.55	9.58	0.430825	0.222089		1257	3.77	2.84	8.37	3.95	10.67	0.471924	0.248096
									1051	6.95	5.79	30.74	12.57	33.94	0.408913	0.103037		1257	4.82	4.16	15.39	7.57	20.45	0.491878	0.173326
									1051	4.29	3.24	10.74	4.38	11.83	0.407821	0.18575		1257	6.28	4.89	23.2	13.28	35.85	0.572414	0.168897
									1051	4.49	4.42	14.67	5.53	14.94	0.37696	0.120403		1257	4.32	3.32	11.02	4.63	12.51	0.420145	0.185705
									1051	5.41	4.38	18.07	6.94	18.73	0.384062	0.127707		1257	5.04	3.84	14.82	7.16	19.34	0.483131	0.184002
									1051	4.12	3.83	11.71	5.49	14.82	0.46883	0.173492		1257	4.94	4.53	17.26	6.94	18.75	0.402086	0.130749
									1051	4.67	3.67	13.15	4.11	11.09	0.312548	0.124794		1257	4.93	3.39	12.78	5.55	15	0.434272	0.187089
									1051	6.07	5.25	24.42	9.19	24.82	0.376331	0.104908		1257	3.96	3.72	11.22	3.52	9.49	0.313725	0.122677
									1051	4.31	3.56	11.84	5.02	13.55	0.423986	0.17552		1257	7.79	4.17	17.96	7.39	19.96	0.41147	0.104192
									1051	4.5	4.02	14.1	4.61	12.45	0.32695	0.12107		1257	8.46	3.09	16.3	3.44	9.28	0.211043	0.0813341
									1051	4.72	4.29	15.52	6.65	17.95	0.428479	0.146206		1257	7.08	5.42	28.08	12.79	34.54	0.455484	0.117447
									1051	2.91	2.47	5.6	1.55	4.18	0.276786	0.166742		1257	7.1	4.71	24.49	6.22	16.79	0.253981	0.0754209
									1051	3.81	3.18	9.36	3.13	8.44	0.334402	0.155155		1257	5.64	3.22	13.74	3.34	9.01	0.243086	0.109083
									1051	3.77	2.99	8.77	3.09	8.34	0.352338	0.175096		1257	6.98	3.97	21.18	6.62	17.87	0.312559	0.114927
									1051	4.58	4.25	14.87	8.12	21.92	0.546066	0.187462		1257	6.45	4.81	24.28	13.6	36.71	0.560132	0.174057
									1051	5.91	5.12	23.08	9.38	25.33	0.406412	0.115632		1257	4.21	2.92	8.6	3.78	10.2	0.439535	0.201115
									1051	4.13	3.77	12.13	5	13.5	0.412201	0.162682		1257	4.45	3.74	12.82	5.92	15.99	0.461778	0.181644
									1051	5.49	4.38	18.46	7.28	19.66	0.394366	0.132012		1331	6.37	5.41	26.59	11.96	32.3	0.449793	0.122518
									1051	4.23	3.88	12.12	4.33	11.69	0.357261	0.129863		1331	7.57	6.22	36.71	20.3	54.82	0.552983	0.13238
									1051	5.06	4.07	14.31	6.64	17.92	0.464011	0.151297		1331	6.67	5.41	27.89	14.92	40.29	0.534959	0.145965
									1051	4.55	4.03	13.3	4.93	13.3	0.370677	0.127417		1331	6.2	4.52	20.8	4.76	12.84	0.228846	0.0717695
									1051	6.07	4.54	21.02	8.18	22.07	0.389153	0.124869		1331	7.01	6.78	32.1	12.27	33.12	0.382243	0.0727225
									1051	4.56	4.17	14.85	6.05	16.35	0.407407	0.14572		1331	7.64	5.35	31.72	25.04	67.6	0.789407	0.218693
									1051	3.62	3.14	8.58	2.79	7.52	0.325175	0.149292		1331	8.39	5.85	33.12	25.47	68.77	0.769022	0.169417
									1051	4.28	3.83	12.54	3.63	9.8	0.289474	0.110425		1331	8.77	8.07	55.45	32.52	87.81	0.586474	0.108744
									1051	2.9	2.48	5.49	2.58	6.96	0.469945	0.276261		1331	8.84	6.92	48.24	27.53	74.34	0.570688	0.124206
									1051	3.65	2.67	7.58	2.56	6.91	0.337731	0.1879		Bass River	5.9	4.26	19.55	10.98	29.64	0.561637	0.195854
									1051	5.38	4.31	17.87	7.87	21.24	0.440403	0.150397		Bass River	4.99	3.21	12.16	5.18	13.98	0.425987	0.192407
									1051	4.5	4.1	14.12	5.25	14.18	0.371813	0.13255		Bass River	7.86	5	30.09	15.16	40.93	0.503822	0.147346
									1051	4.32	3.53	11.57	5.46	14.74	0.47191	0.193714		Bass River	6.63	5.6	26.76	17.05	46.05	0.637145	0.156616
									1051	3.88	2.97	8.5	2.98	8.05	0.350588	0.166293		Bass River	6.33	4.75	22.99	12.68	34.24	0.551544	0.169562
									1051	4.41	4.15	13.36	5.93	16.02	0.443862	0.149115		Bass River	5.11	3.04	11.77	8.2	22.15	0.696686	0.331625
									1051	3.67	3.08	8.78	3.22	8.69	0.366743	0.17664		Bass River	4.11	3.59	11.03	4.22	11.39	0.382593	0.152154
									1051	6.13	5.65	26.99	10.07	27.19	0.373101	0.0982819		Bass River	4.71	3.96	14.55	6.87	18.55	0.472165	0.177642
									1051	4.42	4.02	13.79	6.91	18.66	0.501088	0.184759		Bass River	5.11	4.39	16.62	5.63	15.21	0.338748	0.109184
									1051	5.04	4.17	16.04	6.37	17.19	0.397132	0.138816		Bass River	7.92	4.94	29	10.97	29.63	0.378276	0.1084
									1051	5.64	3.65	16.03	5.76	15.56	0.359326	0.146406		Bass River	6.11	4.62	18.94	9.87	26.65	0.521119	0.144542
									1051	3.78	3.51	9.97	2.88	7.78	0.288867	0.11811		Bass River	7.17	4.49	24.86	11.22	30.3	0.451327	0.148246
									1051	3.68	2.99	8.41	2.71	7.31	0.322235	0.157319		Bass River	6.78	5.09	26.56	18.45	49.8	0.694654	0.200601
									1051	4.93	3.38	12.83	4.29	11.58	0.334373	0.145472		Bass River	4.03	2.46	7.51	2.85	7.69	0.379494	0.223188
									1051	4.49	4.09	14.18	5.27	14.23	0.37165	0.134004		Bass River	4.44	3.65	12.27	5.29	14.29	0.431133	0.1708
									1051	5.05	3.68	13.06	4.85	13.09	0.371363	0.135443		Bass River	6.14	3.88	18.16	10.03	27.08	0.552313	0.207239
									1051	5.7	4.62	19.7	8.45	22.82	0.428934	0.132648		Bass River	6.4	4.4	20.92	8.52	23.02	0.407266	0.131327
									1051	4.91	3.65	12.41	3.19	8.6	0.257051	0.0931376		Bass River	5.02	4.25	16.74	5.95	16.07	0.355436	0.125325
									1051	8.01	5.18	31.14	11.39	30.74	0.365768	0.101212		Bass River	2.69	2.34	4.91	1.83	4.94	0.372709	0.237284
									1051	5.1	3.7	14.57	4.64	12.53	0.318463	0.126925		Bass River	3.08	2.29	5.44	1.74	4.69	0.319853	0.205745
									1051	4.16	2.63	7.98	2.63	7.1	0.329574	0.174563		Bass River	3.2	2.74	6.6	2.06	5.55	0.312121	0.163764
									1051	3.88	3.25	9.81	2.85	7.71	0.29052	0.132815		Bass River	2.79	1.99	4.09	1.55	4.19	0.378973	0.267931
									1051	4.49	4.02	14.01	7.17	19.37	0.511777	0.188722		Bass River	3.7	3.31	9.5	4.3	11.6	0.452632	0.202587
									1051	4.95	4.05	15.55	5.53	14.92	0.355627	0.13008		Bass River	2.52	1.98	3.8	1.2	3.23	0.315789	0.231981
									1051	4.62	3.59	11.2	3.99	10.76	0.35625	0.12798		Bass River	2.87	1.97	4.42	1.46	3.94	0.330317	0.250346
									1051	3.98	3.91	11.79	4.44	11.99	0.37659	0.139363		Bass River	9.38	6.91	46.52	18.1	48.86	0.38908	0.0771829
									1051	3.85	3.01	8.94	2.66	7.19	0.297539	0.145643
									1051	5	3.11	11.85	3.91	10.55	0.329958	0.154414
									1051	4.33	3.81	11.91	5.73	15.47	0.481108	0.174108
									1051	4.74	4	14.72	6.13	16.54	0.41644	0.15437
									1051	5.87	4.66	20.45	8.24	22.25	0.402934	0.123458
									1051	6	4.24	19.19	5.3	14.32	0.276186	0.0938414
									1051	4.44	3.44	11.66	3.67	9.91	0.314751	0.133404
									1051	2.74	2.31	4.7	1.64	4.42	0.348936	0.214225
									1051	4.49	4.29	14.45	5.44	14.7	0.376471	0.12573
									1051	3.84	3.79	10.85	4.75	12.83	0.437788	0.164469
									1051	7.39	5.49	31.43	19.66	53.07	0.625517	0.168576
									1051	4.36	3.41	10.39	3.07	8.3	0.295476	0.11565
									1051	4.66	3.8	13.84	4.2	11.33	0.303468	0.119206
									1051	5.16	3.95	15.46	3.82	10.32	0.247089	0.0906193
									1051	4.06	3.33	9.92	2.2	5.95	0.221774	0.0933275
									1051	3.89	3.32	9.85	4.16	11.23	0.422335	0.185297
									1051	4.06	3.73	11.73	4.88	13.17	0.416027	0.164998
									1051	3.48	3.01	7.96	3.17	8.56	0.398241	0.192021
									1051	3.37	3.07	7.59	2.67	7.22	0.351779	0.160548
									1051	3.51	3.23	8.44	3.08	8.32	0.364929	0.160635
									1051	4.56	3.68	12.9	5.25	14.18	0.406977	0.162368
									1051	2.77	2.56	5.47	2.28	6.15	0.416819	0.23987
									1051	5.38	3.92	16	8.09	21.85	0.505625	0.186894
									1051	5.71	3.8	16.53	6.3	17.02	0.381125	0.145928
									1051	4	3.27	10.11	3.31	8.94	0.327399	0.1478
									1051	4.65	4.48	15.83	7.13	19.24	0.450411	0.145909
									1051	3.91	3.16	9.04	3.89	10.49	0.43031	0.190283
									1051	3.82	2.94	8.67	3.67	9.92	0.423299	0.21228
									1051	5.15	4.25	16.92	7.63	20.59	0.450946	0.156654
									1051	4.74	3.68	13.28	5.55	15	0.417922	0.165128
									1051	4.78	4.22	15.49	8.94	24.13	0.577147	0.200579
									1051	3.48	2.85	7.6	2.38	6.44	0.313158	0.160809
									1051	5.17	3.2	12.71	4.7	12.7	0.369788	0.169554
									1051	3.48	2.52	6.77	2.3	6.21	0.339734	0.198769
									1051	6.31	4.63	22.03	12.4	33.49	0.562869	0.175078
									1051	3.17	2.87	6.98	4.37	11.8	0.626074	0.319639
									1051	4.78	4.09	15.27	6.58	17.76	0.43091	0.157164
									1051	3.68	3.25	9.33	2.84	7.66	0.304394	0.139542
									1051	4.64	3.65	12.4	6.16	16.64	0.496774	0.190317
									1051	4.36	3.88	12.87	5.56	15	0.432012	0.161781
									1051	4.38	3.15	10.11	4.46	12.05	0.441147	0.195993
									1051	3.53	3.15	8.39	4.58	12.37	0.545888	0.24973
									1051	4.08	3.51	10.76	5.94	16.03	0.552045	0.225691
									1209_20H	4.06	3.31	10.4	2.8	7.55	0.269231	0.12022
									1209_20H	5.17	3.52	11.8	2.35	6.35	0.199153	0.0700637
									1209_20H	4.33	3.38	10.68	4.8	12.97	0.449438	0.18532
									1209_20H	5.09	4.51	17.31	9.72	26.23	0.561525	0.179307
									1209_20H	9.12	8.14	57.14	35.67	96.31	0.624256	0.112736
									1209_20H	7.91	5.43	33.11	13.02	35.15	0.393235	0.106619
									1209_20H	5.07	4.57	17.36	6.58	17.77	0.379032	0.118683
									1209_20H	4.38	3.75	12.58	7.32	19.75	0.581876	0.226974
									1209_20H	2.96	2.6	5.71	1.22	3.29	0.21366	0.116446
									1209_20H	5.52	4.1	17.07	7.15	19.31	0.418864	0.147164
									1209_20H	6.64	4.81	24.31	7.47	20.17	0.307281	0.0928675
									1209_20H	3.85	3.04	8.57	2.46	6.65	0.287048	0.132047
									1209_20H	5.43	4.73	14.49	2.54	6.85	0.175293	0.0399313
									1209_20H	4.27	3.81	12.36	5.09	13.74	0.411812	0.156834
									1209_20H	8	6.95	43.4	23.43	63.26	0.539862	0.115801
									1209_20H	4.25	4.03	13.37	5.37	14.51	0.401645	0.148586
									1209_20H	5.4	3.84	15.94	3.24	8.75	0.203262	0.0777124
									1209_20H	9.02	8.09	54.85	31.12	84.03	0.567366	0.100679
									1209_20H	10.46	7.62	60.72	42.39	114.46	0.698123	0.133298
									1209_20H	12.73	9.29	89.14	47.55	128.39	0.533431	0.0826594
									1209_20H	3.26	3.11	7.88	3.04	8.21	0.385787	0.184135
									1209_20H	4.65	3.34	11.5	2.96	7.99	0.257391	0.10898
									1209_20H	4.83	3.58	13.07	4.1	11.06	0.313695	0.126495
									1209_20H	4.01	2.8	8.33	2.57	6.94	0.308523	0.156126
									1209_20H	5.58	5.16	21.85	7.92	21.39	0.362471	0.101811
									1209_20H	7.26	5.57	34.22	16.14	43.58	0.471654	0.136854
									1209_20H	6.55	6.29	32.25	13.58	36.66	0.421085	0.100083
									1209_20H	4.97	4.46	16.98	5.65	15.24	0.332744	0.10915
									1209_20H	4.9	4.68	17.6	6.07	16.39	0.344886	0.10802
									1209_20H	4.28	3.47	11.53	4.19	11.3	0.3634	0.155279
									1209_20H	5.09	4.51	17.71	5.09	13.73	0.287408	0.0938963
									1209_20H	4.52	2.86	9.65	4.35	11.75	0.450777	0.224709
									1209_20H	4.33	3.98	13.41	5.04	13.6	0.375839	0.140339
									1209_20H	4.09	3.87	12.22	4.14	11.18	0.338789	0.129079
									1209_20H	5.12	3.78	14.75	4.74	12.79	0.321356	0.123745
									1209_20H	4.5	4.14	14.4	3.54	9.57	0.245833	0.087658
									1209_20H	4.14	3.35	10.56	3.36	9.07	0.318182	0.138118
									1209_20H	7.5	5.98	34.42	17.96	48.5	0.52179	0.127892
									1209_20H	9.13	7.86	55.75	29.34	79.23	0.526278	0.0993449
									1209_20H	5.79	5.03	22.91	7.92	21.39	0.345701	0.103255
									1209_20H	5.21	4.11	16.61	9.45	25.52	0.568934	0.205075
									1209_20H	4.19	3.2	10.39	3.48	9.4	0.334937	0.154905
									1209_20H	8.46	7.58	50.81	26.22	70.8	0.51604	0.103021
									1209_20H	6.11	5.61	26.43	11.56	31.22	0.437382	0.114813
									1209_20H	4.19	3.29	10.62	4.21	11.36	0.396422	0.177287
									1209_20H	4.17	3.88	12.29	4.64	12.52	0.377543	0.141163
									1209_20H	5.82	5.17	23.5	10.28	27.76	0.437447	0.126209
									1209_20H	4.47	3.8	13.2	4.09	11.05	0.309848	0.121018
									1209_20H	8.14	7.4	46.78	30.51	82.38	0.652202	0.130724
									1209_20H	4.37	3.29	11.13	4.22	11.38	0.379155	0.170389
									1209_20H	4.74	3.82	13.8	5.84	15.76	0.423188	0.161254
									1209_20H	5.11	4.31	15.9	5	13.5	0.314465	0.1006
									1209_20H	3.39	3.19	8.15	1.91	5.16	0.234356	0.105743
									1209_20H	4.61	3.51	11.84	2.32	6.27	0.195946	0.0780143
									1209_20H	4.94	3.87	14.83	3.78	10.2	0.254889	0.0975763
									1209_20H	5.7	5.36	23.57	8.74	23.6	0.37081	0.101931
									1209_20H	8.95	8.14	57.07	32.43	87.57	0.56825	0.104442
									1209_20H	3.98	2.64	8.49	3.72	10.05	0.438163	0.256126
									1209_20H	4.7	4.41	15.27	7.88	21.29	0.516045	0.164647
									1209_20H	5.34	4.41	17.3	6.03	16.28	0.348555	0.110892
									1209_20H	4.41	3.56	11.9	3.28	8.86	0.27563	0.112082
									1209_20H	5.17	4.53	17.84	7.3	19.7	0.409193	0.131413
									1209_20H	5.17	3.82	15.02	6.01	16.22	0.400133	0.152145
									1209_20H	5.93	3.48	15.32	7.54	20.36	0.492167	0.200521
									1209_20H	4.53	3.54	11.53	3.71	10.02	0.321769	0.124816
									1209_20H	4.13	4.04	12.25	3.89	10.49	0.317551	0.110214
									1209_20H	3.41	2.93	7.18	2.26	6.1	0.314763	0.147442
									1209_20H	10.27	9.14	72.47	51.17	138.16	0.706085	0.113908
									1209_20H	5.32	4.26	17.69	3.23	8.72	0.182589	0.0638959
									1209_20H	3.32	2.96	7.63	3.14	8.47	0.411533	0.206162
									1209_20H	6.66	5.15	26.3	9.47	25.58	0.360076	0.102391
									1209_20H	4.51	3.95	13.83	4.58	12.38	0.331164	0.124307
									1209_20H	6.06	5.16	24.5	10.47	28.27	0.427347	0.12393
									1209_20H	4.5	4.06	14.15	5.25	14.19	0.371025	0.135175
									1209_20H	4.04	3.8	11.73	6.18	16.68	0.526854	0.202321
									1209_20H	5.97	5.54	25.16	13.92	37.58	0.553259	0.145093
									1209_20H	4.37	3.67	11.47	3.98	10.76	0.346992	0.129143
									1209_20H	10	8.29	64.65	43.35	117.06	0.670534	0.120471
									1209_20H	5	3.53	13.51	5.53	14.94	0.409326	0.169515
									1209_20H	4.98	4.09	15.42	7.96	21.49	0.516213	0.18249
									1209_20H	4.61	3.86	13.06	5.04	13.6	0.385911	0.140138
									1209_20H	5.17	4.71	18.34	8.95	24.18	0.488004	0.149036
									1209_20H	3.99	3.13	9.63	4.4	11.88	0.456906	0.214977
									1209_20H	5.46	4.05	16.13	5.66	15.28	0.350899	0.120702
									1209_20H	5.34	3.25	11.74	6.1	16.47	0.519591	0.206549
									1209_20H	3.84	3.8	11.18	4.19	11.33	0.374776	0.144317
									1209_20H	7.19	4.73	24.64	13.41	36.21	0.544237	0.159213
									1209_20H	6.2	5.4	25.94	14.27	38.54	0.550116	0.150746
									1209_20H	7.48	6.45	37.61	21.72	58.64	0.577506	0.133303
									1209_20H	4.07	3.28	9.92	4.54	12.27	0.457661	0.198023
									1209_20H	5.43	3.78	14.88	7.32	19.77	0.491935	0.180189
									1209_20H	4.39	3.52	11.59	5.56	15.01	0.479724	0.195221
									1209_20H	5.29	4.49	18.5	8.11	21.91	0.438378	0.145236
									1209_21H	6.59	5.98	30.64	19.68	53.14	0.642298	0.159492
									1209_21H	4.38	3.76	12.76	6.19	16.7	0.48511	0.190916
									1209_21H	3.85	3.54	10.55	4.7	12.69	0.445498	0.186051
									1209_21H	4.3	3.38	9.89	3.45	9.3	0.348837	0.134128
									1209_21H	5.91	4.08	18.6	9.48	25.6	0.509677	0.184036
									1209_21H	4.25	3.35	10.77	5.35	14.45	0.49675	0.214228
									1209_21H	4.59	4.22	15.13	6.83	18.43	0.451421	0.159582
									1209_21H	5.58	3.59	14.55	5.31	14.35	0.364948	0.141017
									1209_21H	4.54	3.5	12.38	6.46	17.44	0.521809	0.221841
									1209_21H	5.99	5.48	24.84	13.32	35.97	0.536232	0.141422
									1209_21H	4.47	4.05	13.84	9.1	24.58	0.657514	0.237042
									1209_21H	4.26	3.59	11.84	7.51	20.27	0.634291	0.261242
									1209_21H	4.33	3.19	10.69	6.1	16.48	0.570627	0.2644
									1209_21H	5.2	4.54	17.66	8.49	22.93	0.480747	0.151284
									1209_21H	4.74	4.17	15.17	7.51	20.28	0.495056	0.174017
									1209_21H	5.07	4.53	17.87	10.34	27.92	0.578623	0.189809
									1209_21H	4.92	3.23	12.22	4.95	13.36	0.405074	0.184177
									1209_21H	6.64	6.01	28.7	13.32	35.97	0.464111	0.106069
									1209_21H	4.61	3.61	12.75	7.17	19.35	0.562353	0.227932
									1209_21H	4.58	3.48	12.2	6.22	16.8	0.509836	0.214175
									1209_21H	7.35	6.56	37.27	18.9	51.04	0.50711	0.114122
									1209_21H	6.93	5.09	26.2	17.47	47.18	0.666794	0.185834
									1209_21H	4.18	3.58	11.18	5.9	15.92	0.527728	0.210335
									1209_21H	5.26	4.68	19.01	8.28	22.35	0.43556	0.137263
									1209_21H	4.99	4.22	15.32	7.88	21.28	0.51436	0.169357
									1209_21H	5.28	4.56	15.28	5.68	15.34	0.371728	0.0988066
									1209_21H	5.19	3.71	14.3	5.94	16.04	0.415385	0.158808
									1209_21H	4.85	4.47	16.68	8.13	21.95	0.48741	0.160227
									1209_21H	5.5	3.75	15.86	9.77	26.37	0.616015	0.241252
									1209_21H	8.03	5.82	36.34	32.81	88.58	0.902862	0.230381
									1209_21H	5.79	4.04	17.11	8.4	22.67	0.490941	0.169762
									1209_21H	5.03	4.05	15.03	6.31	17.04	0.419827	0.146067
									1209_21H	7.98	6.85	42.11	36.56	98.7	0.868202	0.186476
									1209_21H	4.62	3.55	12.39	5.99	16.17	0.483454	0.196485
									1209_21H	4.86	3.66	13.18	6.16	16.64	0.467375	0.180711
									1209_21H	7.76	5.71	33.44	20.85	56.29	0.623505	0.157389
									1209_21H	4.56	3.81	13.28	6.66	17.98	0.501506	0.192159
									1209_21H	5.2	3.76	15.06	9.03	24.38	0.599602	0.23459
									1209_21H	4.71	4.08	14.88	5.89	15.9	0.395833	0.143475
									1209_21H	5.22	4.35	17.01	9.46	25.55	0.556143	0.182913
									1209_21H	4.33	4.29	14.47	6.75	18.23	0.466482	0.161772
									1209_21H	5.94	2.81	11.47	4.51	12.19	0.3932	0.183645
									1209_21H	4.77	4.02	14.43	5.28	14.26	0.365904	0.130817
									1209_21H	3.88	3.44	9.93	4.19	11.33	0.421954	0.174288
									1209_21H	4.56	4.32	15.22	7.6	20.53	0.499343	0.170562
									1209_21H	5.37	4.47	17.42	7.66	20.69	0.439724	0.136346
									1209_21H	6.11	4.36	19.09	7.08	19.11	0.370875	0.116418
									1209_21H	4.86	3.85	14.4	8.95	24.17	0.621528	0.237283
									1209_21H	7.34	6.7	40.39	19.88	53.68	0.492201	0.115232
									1209_21H	4.18	3.53	11.54	5.03	13.58	0.435875	0.184435
									1209_21H	4.59	3.94	13.74	6.33	17.08	0.460699	0.169668
									1209_21H	4.13	3.68	11.43	4.99	13.46	0.43657	0.170395
									1209_21H	6.84	5.94	31.78	15.26	41.21	0.480176	0.120761
									1209_21H	4.47	3.09	10.81	6.32	17.07	0.584644	0.282809
									1209_21H	4.57	4.07	13.89	7.3	19.7	0.525558	0.18417
									1209_21H	5.82	4.46	19.97	8.1	21.86	0.405608	0.133627
									1209_21H	4.7	3.77	13.65	6.12	16.53	0.448352	0.174973
									1209_21H	4.43	3.69	12.55	8.15	22	0.649402	0.258049
									1209_21H	4.28	4.17	13.05	7.89	21.31	0.604598	0.202471
									1209_21H	4.95	4.35	14.76	6.82	18.41	0.46206	0.13906
									1209_21H	4.33	3.23	10.57	5.08	13.72	0.480605	0.214769
									1209_21H	4.64	4.25	14.98	7.66	20.69	0.511348	0.174556
									1209_21H	3.02	2.2	5.12	2.32	6.28	0.453125	0.303136
									1209_21H	4.81	4.23	15.74	8.64	23.32	0.54892	0.19173
									1209_21H	3.99	3.42	10.65	5.85	15.8	0.549296	0.239404
									1209_21H	4.33	3.38	10.98	5.16	13.94	0.469945	0.199219
									1209_21H	4.08	3.74	11.55	4.94	13.34	0.427706	0.16532
									1209_21H	3.84	3.35	10.05	4.95	13.36	0.492537	0.219374
									1209_21H	5.55	5.15	21.86	11.51	31.08	0.526532	0.149338
									1209_21H	5.88	4.51	20.25	11.77	31.77	0.581235	0.187952
									1209_21H	6.63	5.76	29.49	14.63	39.49	0.4961	0.127024
									1209_21H	6.58	6.36	32.46	20.61	55.65	0.634935	0.14789
									1209_21H	6.03	4.85	22.48	12.48	33.69	0.55516	0.168041
									1209_21H	5.83	4.62	20.28	11.84	31.97	0.583826	0.181719
									1209_21H	4	3.58	10.71	5.13	13.84	0.478992	0.191114
									1209_21H	4.47	3.93	13.41	6.02	16.27	0.448919	0.166535
									1209_21H	4.44	3.82	13.15	7.74	20.9	0.588593	0.228156
									1209_21H	4.75	3.97	14.63	8.33	22.48	0.569378	0.212506
									1209_21H	5.54	5.03	21.6	12.57	33.95	0.581944	0.171274
									1209_21H	4.9	3.57	13.34	6.99	18.88	0.523988	0.21377
									1209_21H	7.2	6.39	35.45	23.57	63.65	0.66488	0.153118
									1209_21H	4.17	3.33	10.23	3.81	10.29	0.372434	0.157363
									1209_21H	5.48	4.82	19.54	9.56	25.8	0.489253	0.143412
									1209_21H	3.3	2.52	6.35	2.38	6.42	0.374803	0.216902
									1209_21H	4.32	3.47	11.57	5.01	13.54	0.433016	0.183949
									1209_21H	4.43	3.52	11.81	6.31	17.03	0.534293	0.219554
									1209_21H	4.28	3	9.7	4.19	11.31	0.431959	0.207744
									1209_21H	3.78	3.26	9.45	4.91	13.26	0.519577	0.23343
									1209_21H	5.81	4.66	18.74	8.09	21.85	0.431697	0.122462
									1257	7.36	5.94	33.45	20.24	54.64	0.605082	0.148854
									1257	7	5.72	30.65	18.11	48.91	0.590865	0.151018
									1257	5.38	4.42	18.85	6.21	16.77	0.329443	0.112841
									1257	5.44	4.32	18.25	8	21.61	0.438356	0.150496
									1257	5.13	4.7	18.59	8.75	23.62	0.470683	0.147468
									1257	6.24	5.18	24.61	11.13	30.05	0.452255	0.126956
									1257	6.04	5.36	25.63	14.33	38.68	0.55911	0.157718
									1257	6.86	5.81	30.45	17.26	46.59	0.566831	0.142353
									1257	3.43	2.8	7.74	2.31	6.23	0.29845	0.16406
									1257	4.85	4.12	16.31	6.75	18.22	0.413857	0.156592
									1257	3.91	3.44	10.39	3.45	9.32	0.33205	0.142406
									1257	6.08	4.27	19.9	12	32.39	0.603015	0.206739
									1257	4.67	3.58	13.05	3.54	9.55	0.271264	0.112959
									1257	4.91	4.1	15.62	5.26	14.21	0.336748	0.121713
									1257	4.78	4.41	16.34	8.91	24.07	0.545288	0.183052
									1257	6.4	5.62	28.06	15.25	41.18	0.543478	0.144085
									1257	5.41	4.8	19.98	8.6	23.21	0.43043	0.131771
									1257	5.79	4.53	20.27	10.3	27.82	0.50814	0.165563
									1257	3.66	2.96	8.38	2.61	7.04	0.311456	0.155445
									1257	6.97	5.35	29.84	10.96	29.58	0.367292	0.104923
									1257	4.81	3.4	12.52	3.56	9.62	0.284345	0.122278
									1257	4.59	3.5	12.47	5.56	15.02	0.44587	0.188855
									1257	6.85	5.64	29.36	14.53	39.23	0.494891	0.127356
									1257	5.54	5.2	22.54	11.13	30.06	0.493789	0.141899
									1257	7.1	5.73	31.3	18.23	49.22	0.582428	0.149355
									1257	4.35	3.55	11.79	6	16.21	0.508906	0.209029
									1257	7.07	5	27.07	14.94	40.33	0.551902	0.161433
									1257	5.54	4.46	19.53	9.01	24.34	0.461342	0.156152
									1257	5.88	5.35	24.45	11.74	31.69	0.480164	0.133225
									1257	4.59	2.78	9.71	3.1	8.36	0.319258	0.166902
									1257	5.5	4.62	20.72	11.72	31.65	0.565637	0.19067
									1257	5.31	3.07	12.17	5.46	14.74	0.448644	0.208364
									1257	4.55	4.23	15.04	7.07	19.08	0.47008	0.165855
									1257	4.54	4.12	14.68	4.36	11.77	0.297003	0.108053
									1257	5.35	3.98	16.4	6.44	17.39	0.392683	0.145133
									1257	4.56	3.1	10.91	4.59	12.39	0.420715	0.200044
									1257	5.7	5.4	23.95	13.37	36.09	0.558246	0.153628
									1257	5.23	3.55	13.43	5.69	15.35	0.423678	0.164875
									1257	5.86	5.09	22.57	9.77	26.37	0.432875	0.122903
									1257	5.75	4.81	21.65	10.16	27.43	0.469284	0.14586
									1257	8.08	6.58	41.18	28.34	76.53	0.688198	0.154717
									1257	8.28	4.99	31.95	17.14	46.27	0.536463	0.158775
									1257	5.23	3.89	15.7	6.57	17.74	0.418471	0.15855
									1257	4.62	3.51	12.5	4.85	13.09	0.388	0.162737
									1257	4.38	3.6	11.89	4.04	10.91	0.339781	0.135926
									1257	6.82	5.51	28.27	12.7	34.29	0.449239	0.117143
									1257	6.45	5.18	26.66	14.01	37.84	0.525506	0.154604
									1257	7.85	5.46	35.11	19.35	52.23	0.551125	0.157916
									1257	7.23	6.23	34.99	16.24	43.85	0.464133	0.110528
									1257	4.6	4.3	15.2	9.99	26.98	0.657237	0.224322
									1257	6.3	3.77	17.69	5.22	14.1	0.295082	0.111339
									1257	5.01	4.47	16.97	6.84	18.48	0.403064	0.130498
									1257	6.52	5.99	32.18	15.79	42.64	0.490677	0.128909
									1257	9.2	7.52	53.26	36.46	98.45	0.684566	0.133843
									1257	5.65	5.17	24.05	9.09	24.53	0.377963	0.114957
									1257	5.54	5.04	21.58	9.73	26.28	0.45088	0.132052
									1257	7.14	6.38	35.73	18.96	51.18	0.530647	0.124595
									1257	9.97	7.99	62.16	38.99	105.28	0.627252	0.116995
									1257	7.06	6.06	33.19	15.52	41.91	0.467611	0.114326
									1257	9.83	9.17	70.01	71.74	193.69	1.02471	0.165756
									1257	6.75	4.74	24.44	8.49	22.92	0.347381	0.106917
									1257	6.18	5.54	26.52	10.77	29.08	0.406109	0.108445
									1257	6.47	5.19	25.89	13.11	35.4	0.506373	0.14367
									1257	5.08	4.44	17.6	8.63	23.3	0.490341	0.164582
									1257	5.22	4.77	18.66	9.45	25.5	0.506431	0.151959
									1257	6.39	5.97	29.59	18.07	48.79	0.610679	0.151534
									1257	4.5	3.14	10.97	4.59	12.4	0.418414	0.19758
									1257	6.55	5.18	26.4	13.24	35.75	0.501515	0.143876
									1257	4.3	3.31	11.04	4.91	13.26	0.444746	0.199048
									1257	4.49	4.09	14.57	5.65	15.25	0.387783	0.143667
									1257	5.44	4.31	20.01	8.94	24.14	0.446777	0.168961
									1257	6.19	5.06	24.36	12.17	32.86	0.499589	0.146656
									1257	6.51	6.18	30.95	15.67	42.3	0.5063	0.120368
									1257	6.58	4.62	23.65	12.74	34.4	0.538689	0.173245
									1257	6.63	5.73	29.74	14.02	37.84	0.471419	0.123006
									1257	6.52	4.26	18.63	6.48	17.49	0.347826	0.104595
									1257	4.62	3.55	13.44	5.11	13.81	0.380208	0.167619
									1257	8.46	6.97	46.03	20.8	56.16	0.451879	0.096656
									1257	6.94	6.49	33.77	15.69	42.35	0.464614	0.102512
									1257	5.96	5.36	25.76	12.95	34.97	0.502717	0.144443
									1257	3.5	3.29	8.75	3.59	9.7	0.410286	0.180982
									1257	4.95	4.31	16.66	9.11	24.59	0.546819	0.189217
									1257	4.29	4.11	13.51	6.63	17.89	0.490748	0.174733
									1257	6.31	3.95	18.62	9.94	26.85	0.533835	0.192825
									1257	5.36	3.85	14.52	4.95	13.37	0.340909	0.118993
									1257	4.96	3.98	15.42	7.16	19.34	0.464332	0.174047
									1257	4.73	4.41	16.26	8.92	24.1	0.548585	0.185194
									1257	6.4	5.4	26.95	13.76	37.14	0.510575	0.140816
									1257	8.93	7.09	44.78	23.76	64.14	0.530594	0.101089
									1257	4.96	4.25	15.74	6.71	18.11	0.426302	0.143042
									1257	6.16	5.57	26.59	11.06	29.87	0.415946	0.110526
									1257	5.53	4.8	20.37	8.54	23.05	0.419244	0.128012
									1257	5.88	4.52	20.14	11.61	31.36	0.576465	0.184578
									1257	5.78	4.71	21.2	10.01	27.03	0.47217	0.149096
									1257	6.26	4.22	20.17	9.12	24.62	0.452157	0.156242
									1257	13.03	10.2	102.17	72.14	194.77	0.706078	0.101633
									1257	6.45	5.68	28.14	14.46	39.05	0.513859	0.132713
									1257	9.98	7.75	59.9	40.72	109.93	0.6798	0.12974
									1257	6.43	4.87	23.44	13.83	37.34	0.590017	0.173203
									1257	4.35	3.57	11.99	3.83	10.34	0.319433	0.131939
									1257	5.69	4.6	20.1	10.1	27.26	0.502488	0.160212
									1257	5.5	3.95	16.59	9.7	26.19	0.58469	0.215882
									1257	5.63	5.17	22.62	13.78	37.21	0.609195	0.174888
									1257	8.04	6.51	40.31	26.47	71.46	0.656661	0.148367
									1257	5.63	4.19	18.35	7.17	19.35	0.390736	0.138543
									1257	5.76	4.93	22.23	9.64	26.03	0.433648	0.131511
									1257	3.82	2.89	8.21	2.68	7.24	0.326431	0.160427
									1257	6.38	5.77	28.82	12.73	34.36	0.441707	0.114461
									1257	4.96	4.48	16.64	7.11	19.2	0.427284	0.136406
									1257	5.04	3.81	14.77	4.61	12.44	0.312119	0.120343
									1257	6.42	5.67	28.29	13.22	35.69	0.467303	0.12233
									1257	5.15	4.44	17.15	5.01	13.53	0.292128	0.0942467
									1257	5.71	5.41	24.11	11.37	30.69	0.471589	0.129937
									1257	4.15	3.33	10.2	3.08	8.32	0.301961	0.127825
									1257	7.64	5.66	33.35	15.62	42.16	0.468366	0.121887
									1257	9.5	8.69	62.92	41.07	110.9	0.652734	0.109336
									1257	6.01	5.33	24.55	11.43	30.85	0.46558	0.127855
									1257	6.67	5.3	27.64	12.34	33.32	0.446454	0.125788
									1257	6.85	4.2	21.83	9.84	26.57	0.450756	0.155528
									1257	5.42	3.99	16.73	6.24	16.85	0.372983	0.138115
									1257	7.67	6.03	36	16.75	45.23	0.465278	0.114706
									1257	6.38	5.59	27.03	13.62	36.78	0.503885	0.130477
									1257	4.86	4.12	15	5.31	14.34	0.354	0.122932
									1257	6	4.32	20.15	6.93	18.72	0.343921	0.1182
									1257	7.89	6.6	40.61	19.74	53.29	0.486087	0.109694
									1257	5.14	4.24	16.87	6.45	17.41	0.382336	0.133311
									1257	5.99	4.85	22.31	10.46	28.24	0.468848	0.141783
									1257	5.9	4.26	19.59	8.95	24.15	0.456866	0.159644
									1257	6.36	5.36	26.1	8.96	24.2	0.343295	0.0936532
									1257	8.58	6.52	43.31	26.65	71.97	0.615331	0.139546
									1257	7.41	6.01	34.69	18.14	48.97	0.522917	0.129441
									1257	7.14	5.71	31.78	16.66	44.98	0.524229	0.13668
									1257	3.97	3.7	11.24	6.05	16.34	0.538256	0.2126
									1257	6.5	3.67	16.28	5.17	13.95	0.317568	0.112784
									1257	5.01	4.52	17.39	5.82	15.71	0.334675	0.108595
									1331	8.28	7.26	46.34	21.18	57.18	0.457057	0.0926881
									1331	8.27	7.24	46.77	28.05	75.74	0.599743	0.123581
									1331	7.91	7.3	45.11	19.15	51.7	0.424518	0.0867657
									1331	7.02	6.18	33.16	15.69	42.36	0.47316	0.111766
									1331	5.69	5.11	21.96	9.91	26.77	0.451275	0.127386
									1331	7.91	6.54	40.28	21.99	59.36	0.545929	0.124135
									1331	7.4	6.28	35.78	21.76	58.76	0.608161	0.1424
									1331	8.31	7.8	50.29	31.97	86.31	0.635713	0.120769
									1331	8.84	8.47	58.04	32.28	87.17	0.556168	0.0972111
									1331	7.41	5.51	31.24	22.15	59.81	0.709027	0.188041
									1331	9.04	7.6	52.81	29.65	80.06	0.561447	0.10845
									1331	9.3	7.27	52.23	33.88	91.48	0.648669	0.131642
									1331	4.79	4.1	15.16	13.41	36.21	0.884565	0.318073
									1331	6.05	5.1	23.72	11.83	31.95	0.498735	0.143579
									1331	7.06	6.15	32.5	16.68	45.04	0.513231	0.119301
									1331	9.08	8.07	56.34	64	172.8	1.13596	0.206704
									1331	8.21	6.47	39.71	33.85	91.39	0.85243	0.188108
									1331	5.11	4.36	17.11	12.49	33.72	0.729982	0.245567
									1331	6.35	5.86	28.74	22.31	60.24	0.77627	0.195403
									1331	9.4	8.82	64.09	51.49	139.01	0.803401	0.13448
									1331	9.8	6.46	45.93	15.02	40.57	0.327019	0.0701423
									1331	6.62	4.64	22.45	9.77	26.39	0.435189	0.130919
									1331	7.62	6.79	40.08	33.05	89.23	0.824601	0.179671
									1331	8.46	8.1	51.45	22.3	60.22	0.433431	0.0767301
									1331	6.64	5.35	26.42	12.06	32.55	0.456472	0.121192
									1331	7.2	5.09	28.24	12.19	32.9	0.431657	0.124806
									1331	7.16	5.39	29.85	17.74	47.88	0.594305	0.162879
									1331	8.9	7.69	52.2	35.65	96.26	0.68295	0.129365
									1331	7.09	5.98	32.43	22.73	61.37	0.700894	0.171219
									Bass River	8.14	5.52	35.05	21	56.71	0.599144	0.161703
									Bass River	5.96	4.15	18.24	7.83	21.15	0.429276	0.145687
									Bass River	6.23	5.26	25.44	14.45	39.02	0.568003	0.160107
									Bass River	6.12	5.24	24.91	14.82	40.02	0.594942	0.168436
									Bass River	7.75	6.63	39.06	18.57	50.13	0.475422	0.104108
									Bass River	4.05	3.41	10.74	4.96	13.39	0.461825	0.20115
									Bass River	5.49	4.25	18.13	9.24	24.94	0.509653	0.17796
									Bass River	7.64	6.29	37.08	21.62	58.38	0.583064	0.136604
									Bass River	4.7	3.35	11.71	5.45	14.72	0.465414	0.197338
									Bass River	4.96	3.55	13.44	6.43	17.35	0.478423	0.19646
									Bass River	5.15	4.3	16.77	8.69	23.47	0.518187	0.174292
									Bass River	4.92	4.62	17.26	8.89	24	0.515064	0.161679
									Bass River	5.19	3.54	13.63	5.88	15.89	0.431401	0.172665
									Bass River	5.09	3.85	13.69	6.79	18.33	0.495982	0.171883
									Bass River	3.99	3.88	11.93	5.36	14.47	0.449288	0.170424
									Bass River	5.77	5.2	23.37	12.8	34.55	0.547711	0.156686
									Bass River	5.35	4.35	17.75	7.87	21.24	0.44338	0.148472
									Bass River	6.66	5.71	29.5	19.43	52.45	0.658644	0.170894
									Bass River	5.91	3.93	18.16	9.58	25.87	0.527533	0.200445
									Bass River	3.77	3.11	9.1	3.86	10.43	0.424176	0.202175
									Bass River	3.63	3.29	8.96	3.45	9.32	0.385045	0.167696
									Bass River	4.45	3.28	11.14	4.71	12.73	0.422801	0.187895
									Bass River	5.74	4.23	18.41	7.65	20.66	0.415535	0.142256
									Bass River	5.03	3.59	13.71	5.5	14.84	0.401167	0.162034
									Bass River	3.98	3.09	9.55	3.6	9.71	0.376963	0.180927
									Bass River	3	2.16	4.72	1.6	4.33	0.338983	0.21832
									Bass River	6.95	6.38	34.61	19.6	52.93	0.56631	0.132322
									Bass River	4.55	3.73	12.67	5.48	14.8	0.432518	0.16533
									Bass River	4.61	4	14.02	4.86	13.11	0.346648	0.125839
									Bass River	5.1	4.87	19.27	8.31	22.45	0.43124	0.131212
									Bass River	5.66	4.52	19.64	11.38	30.72	0.57943	0.187953
									Bass River	5.95	4.81	20.75	8.97	24.22	0.432289	0.124448
									Bass River	6.88	5.88	27.28	11.39	30.75	0.417522	0.0914496
									Bass River	4.03	3.41	10.6	4.36	11.78	0.411321	0.177695
									Bass River	6.82	5.08	26.25	13.13	35.45	0.50019	0.14248
									Bass River	7.4	6.59	38.2	21.12	57.03	0.55288	0.125514
									Bass River	3.53	3.15	8.71	3.54	9.57	0.406429	0.193023
									Bass River	7.94	7.09	42.77	22.2	59.93	0.519055	0.106229
									Bass River	4.81	3.95	13.9	5.41	14.6	0.389209	0.137676
									Bass River	3.94	2.69	7.88	2.92	7.88	0.370558	0.195607
									Bass River	7.36	5.28	29.54	17.92	48.38	0.606635	0.166799
									Bass River	5.44	3.87	16.35	6.27	16.92	0.383486	0.146977
									Bass River	3.55	3.15	8.72	3.28	8.85	0.376147	0.177838
									Bass River	5.06	3.5	14.28	6.32	17.05	0.442577	0.19473
									Bass River	4.87	4.16	15.82	6.25	16.87	0.39507	0.141633
									Bass River	4.62	3.11	11.12	4.69	12.67	0.421763	0.200452
									Bass River	4.55	3.57	12.45	4.98	13.44	0.4	0.164015
									Bass River	3.73	3	8.71	2.98	8.05	0.342135	0.169538
									Bass River	4.38	2.99	10.12	3.18	8.6	0.314229	0.1551
									Bass River	4.19	3.62	11.8	4.75	12.82	0.402542	0.16522
									Bass River	5.16	4.7	18.99	9.97	26.92	0.525013	0.167052
									Bass River	6.15	5.05	22.83	9.03	24.39	0.395532	0.109959
									Bass River	7.02	6.65	36.67	19.9	53.74	0.542678	0.122426
									Bass River	6.26	4.38	20.54	7.61	20.55	0.370497	0.121022
									Bass River	6.13	4.32	20.54	9.4	25.38	0.457644	0.156928
									Bass River	4.82	3.65	12.8	5.24	14.14	0.409375	0.155848
									Bass River	7.93	3.6	15.88	6.41	17.31	0.403652	0.119119
									Bass River	5.38	4.53	19.01	10.87	29.35	0.571804	0.188041
									Bass River	7.5	6.7	37.81	20.02	54.05	0.52949	0.113568
									Bass River	4.98	2.96	11.36	6.47	17.46	0.569542	0.2832
									Bass River	6.34	5.26	25.22	13.46	36.33	0.533703	0.14655
									Bass River	3.71	3.25	9.43	3.5	9.46	0.371156	0.17058
									Bass River	5.35	4.19	15.38	6.68	18.03	0.43433	0.13583
									Bass River	4.67	3.45	12.44	4.89	13.21	0.393087	0.168018
									Bass River	2.41	2.27	4.12	1.22	3.3	0.296117	0.187626
									Bass River	3.24	2.65	6.6	2.73	7.36	0.413636	0.229154
									Bass River	3.79	3.17	9.24	4.51	12.17	0.488095	0.226162
									Bass River	5.25	4.14	16.71	8.25	22.27	0.493716	0.175104
									Bass River	5.48	5.19	22.14	11.4	30.77	0.514905	0.1475
									Bass River	5.24	3.13	12.69	5.5	14.86	0.433412	0.204618
									Bass River	4.89	3.76	14.36	5.11	13.8	0.35585	0.141168
									Bass River	6.16	5.39	24.67	17.16	46.33	0.695582	0.18313

## Sheet: Discoaster raw data
Discoaster multiradiatus group									Discoaster lodoensis group
Site	Max Width (μm)	Min Width (μm)	Area (μm²)	Volume (µm³)	Mass (pg)	Thickness (μm)	ks		Site	Max Width (μm)	Min Width (μm)	Area (μm²)	Volume (µm³)	Mass (pg)	Thickness (μm)	ks
277	6.2	4.92	22.77	10.09	27.24	0.443127	0.0423366		401	16.58	14	135.02	72.85	196.7	0.53955	0.0159837
277	7.16	4.13	22.13	10.1	27.28	0.456394	0.0275158		401	16.66	13.35	140.87	61.2	165.24	0.434443	0.0132351
277	7.08	6.47	34.39	19.15	51.71	0.556848	0.0539596		401	7.15	6.74	32.32	8.73	23.58	0.270111	0.0238834
277	6.76	5.94	30.42	16.83	45.45	0.553254	0.0544809		401	7.74	6.38	36.96	13.77	37.17	0.372565	0.0296969
277	5.13	4.35	17.3	7.47	20.17	0.431792	0.055331		401	11.22	9.9	81.16	66.67	180.02	0.821464	0.0472011
277	8.77	6.58	38.91	35.36	95.48	0.908764	0.052422		401	11.22	9.9	81.16	69.36	187.26	0.854608	0.0491055
277	12.91	8.82	86.34	30.96	83.6	0.358582	0.0143887		401	12.3	8.11	69.1	33.43	90.26	0.483792	0.0179647
277	5.74	5.33	23.37	12.76	34.45	0.545999	0.0674707		401	12.5	10.88	101.31	33.2	89.63	0.327707	0.0169984
277	5.53	4.93	20.93	8.35	22.54	0.398949	0.0493755		401	8.52	6.48	34.93	9.24	24.94	0.264529	0.0149401
277	4.83	4.26	15.9	5.72	15.43	0.359748	0.0507639		401	10.43	8.95	59.47	24.06	64.96	0.404574	0.0212052
277	7.24	6.34	35.33	19.09	51.56	0.540334	0.0503026		401	18.47	14.88	176.2	119.74	323.3	0.679569	0.0190037
277	6.78	6.46	33.43	16.98	45.84	0.507927	0.0544814		527	12.69	8.07	63.88	35.57	96.03	0.556825	0.017406
277	5.54	5.05	21.11	9.47	25.56	0.448603	0.0556956		527	8.4	7.89	45.28	17.84	48.17	0.393993	0.0300993
277	7.88	7.42	44.7	32.96	88.98	0.73736	0.067361		527	10.94	9.07	71.8	45.6	123.12	0.635097	0.0348267
277	5.31	4.96	20.19	10.5	28.35	0.520059	0.0701303		577	14.44	11.29	104.81	57.19	154.41	0.545654	0.0189941
277	7.78	6.33	37.78	18.55	50.1	0.491001	0.0393917		577	14.43	13.81	128.45	58.61	158.24	0.456286	0.0195062
277	5.46	5.01	20.84	11.65	31.47	0.559021	0.0715728		577	8.56	8.18	48.3	18.16	49.02	0.375983	0.0289531
277	5.36	4	16.29	10.86	29.33	0.666667	0.0705238		577	16.3	14	139.49	78.27	211.34	0.561115	0.0180731
277	7.27	5.04	27.96	15.27	41.22	0.546137	0.0397407		577	16.41	15.69	187.16	119.24	321.96	0.637102	0.0269834
277	4.58	3.22	11.21	3.62	9.77	0.322926	0.0376801		577	17.65	13.32	146.51	58.73	158.57	0.40086	0.0106813
277	5.66	4.37	18.45	6.11	16.49	0.331165	0.0336971		577	12.34	8.49	78.63	56.25	151.86	0.715376	0.0299348
277	5.08	4.11	15.71	5.86	15.81	0.373011	0.0446999		577	13.5	12.31	113.31	63.83	172.34	0.563322	0.0259432
277	6.19	4.87	22.95	9.36	25.27	0.407843	0.0394643		577	15.79	14.85	163.05	76.11	205.5	0.466789	0.0193328
277	6.53	5.87	29.16	14.42	38.94	0.494513	0.0517876		577	12.03	8.76	74.47	52.22	140.99	0.701222	0.0299944
277	7.59	6.66	39.04	22.74	61.39	0.58248	0.0520074		577	14.37	12.44	106.72	42.82	115.62	0.401237	0.0144303
277	6.2	4.75	22.78	14.71	39.71	0.645742	0.0617217		577	14.53	13.53	130.53	62.59	168.98	0.479507	0.0204037
277	5.66	5.23	21.72	8.87	23.94	0.408379	0.0489186		577	10.77	8.88	64.7	32.52	87.81	0.502628	0.0260318
356	10.08	8.27	53.76	25.37	68.5	0.471912	0.0247707		577	11.67	8.9	67.56	31.72	85.64	0.469509	0.0199582
356	14.43	11.91	122.6	38.81	104.8	0.316558	0.0129165		577	11.07	9.27	70.57	63.78	172.22	0.903783	0.0470156
356	14.98	13.07	143.02	43.41	117.21	0.303524	0.0129138		577	14.58	12.31	110.93	37.29	100.69	0.336158	0.0120315
356	16.39	13.34	150.27	57.74	155.9	0.384242	0.0131141		577	13.95	13.67	131.57	48.34	130.53	0.367409	0.0178067
356	11.83	7.39	58.5	23.11	62.4	0.395043	0.0139587		577	12.45	10.25	89.89	43.88	118.48	0.488152	0.0227383
356	14.3	9.98	80.41	15.7	42.4	0.195249	0.00536898		577	13.31	8.61	71.82	54.7	147.69	0.761626	0.0231981
356	12.43	8.45	70.73	28.51	76.98	0.403082	0.0148451		577	20.89	17.64	260.8	128.36	346.57	0.492178	0.0140804
356	10.4	7.86	56.49	26.64	71.94	0.471588	0.0236829		577	16.44	13.01	145.27	131.84	355.98	0.907551	0.0296717
356	14.18	13.27	138.77	74.01	199.83	0.533329	0.0259574		762	16.08	12.42	132.79	112.8	304.55	0.849462	0.0271301
356	10.47	7.79	58.82	22	59.4	0.374022	0.0191683		762	13.36	12.78	126.87	74.38	200.83	0.586269	0.0311915
356	14.79	12.98	131.87	31.05	83.83	0.235459	0.00959748		762	17.66	17.27	205.52	84.95	229.36	0.413342	0.0154238
356	13.7	10.69	89.7	24	64.8	0.267559	0.00933361		762	15.08	12.06	132.56	59.05	159.44	0.445459	0.0172193
356	11.16	9.78	78.81	29.36	79.26	0.372542	0.0211234		762	14.21	9.21	90.47	34.65	93.57	0.383	0.0120759
356	20.11	15.7	234.46	170.32	459.87	0.726435	0.0209425		762	13.75	10.55	99.82	83.35	225.05	0.835003	0.0320625
356	9.45	9.01	63.25	20.56	55.51	0.325059	0.0243628		865	13.79	11.38	101.49	67.49	182.21	0.664992	0.0257363
356	14.42	10.16	88.31	25.54	68.96	0.289208	0.00851775		865	13.04	9.28	85.12	42.43	114.57	0.498473	0.0191355
356	15.87	12.8	156.29	60.07	162.18	0.38435	0.0150289		865	10.71	6.52	45.36	18.28	49.36	0.402998	0.0148802
356	14.63	13.85	129.98	25.33	68.39	0.194876	0.00808914		865	7.84	5.78	21.74	4.51	12.19	0.207452	0.00935898
356	11.48	9.05	61.99	16.57	44.75	0.267301	0.0109521		865	16.72	13.65	145.99	57.45	155.1	0.39352	0.0122908
356	11.59	9.3	74.61	12.59	33.99	0.168744	0.00808678		865	8.08	6.2	21.44	4.47	12.07	0.208489	0.00847371
356	16.93	10.86	110.95	43.44	117.29	0.391528	0.00895198		865	15.4	14.95	145.51	88.25	238.29	0.606488	0.0241631
356	12.46	11.29	104.18	65.92	177.98	0.632751	0.0340771		865	20	14.96	204.64	125.35	338.44	0.612539	0.0156687
356	12.3	10.83	100.05	54.77	147.89	0.547426	0.0294325		865	13.2	13.06	121.88	50.81	137.18	0.416885	0.0220916
356	10.65	10.62	68.44	16.6	44.81	0.242548	0.0137423		865	27.77	26.28	536.89	351.9	950.13	0.655442	0.016432
356	17.69	11.39	153.63	90.9	245.43	0.591681	0.0164203		865	23.76	21.13	351	148.94	402.14	0.42433	0.0111038
356	11.57	10.11	85.34	45.76	123.56	0.536208	0.0295451		865	8.95	8.27	50.06	39.96	107.88	0.798242	0.0557386
401	9.38	8.13	59.19	34.36	92.77	0.580503	0.0416337		883	11.69	9.46	79.26	25.97	70.13	0.327656	0.0162566
401	3.25	2.86	7.17	3.16	8.53	0.440725	0.0920528		883	10.82	10.01	80.67	20.43	55.15	0.253254	0.0161282
401	9.05	7.78	52.89	21.78	58.8	0.411798	0.0293841		883	14.61	14.19	148.06	80.58	217.58	0.544239	0.0258391
401	15.8	13.7	168.67	179.39	484.36	1.06356	0.0454807		929	7	6.83	35.92	11.16	30.15	0.31069	0.0325364
401	7.31	6.93	39.34	21.06	56.87	0.535333	0.0539146		929	16.82	14.81	162.24	124.41	335.92	0.766827	0.0261443
401	10.66	8.46	66.8	26.1	70.46	0.390719	0.0215461		929	11.84	11.4	97.21	23.86	64.43	0.245448	0.0143752
401	7.09	6.32	34.33	23.97	64.71	0.698223	0.0672557		1051	18.87	17.04	222.92	176.44	476.38	0.791495	0.0262592
401	9.65	7.16	52.34	28.31	76.44	0.540887	0.0315034		Bass River	12.45	9.31	76.94	44.71	120.73	0.581102	0.0231684
401	8.74	6.3	41.25	13.73	37.07	0.332848	0.0205654		Bass River	9.15	7.78	48.42	16.23	43.83	0.335192	0.0211863
401	10.1	8.63	66.09	22.65	61.14	0.342714	0.0219839		Bass River	13.9	11.12	110.18	56.87	153.55	0.516155	0.0211758
401	5.91	5.34	24.23	9.33	25.2	0.38506	0.045198		Bass River	11.59	9.18	76.56	30.27	81.74	0.395376	0.0194429
401	5.65	5.18	22.37	12.9	34.82	0.576665	0.0715228		Bass River	13.14	11.16	103	95.8	258.66	0.930097	0.0422259
401	9.04	6.58	40.34	11.48	30.98	0.284581	0.0155395
401	5.91	5.34	24.23	10.15	27.41	0.418902	0.0491704
401	5.66	5.18	22.39	13.67	36.9	0.61054	0.075391
401	9.04	6.58	40.34	12.79	34.54	0.317055	0.0173127
401	6.94	6.3	33.77	13.91	37.55	0.411904	0.0416149
401	6.74	5.05	25.23	9.49	25.62	0.37614	0.0309946
401	6.93	6.34	33.9	15.04	40.6	0.443658	0.0451906
401	8.23	7.61	48.41	23.93	64.6	0.494319	0.0429283
401	7.68	6.42	35.93	14.41	38.91	0.401058	0.0318112
401	6.56	5.57	27.8	10.55	28.48	0.379496	0.0373715
401	7.28	6.56	36.77	23.24	62.76	0.632037	0.060234
401	7.03	6.45	34.49	22.69	61.26	0.657872	0.0653083
401	6.01	4.33	18.5	5.72	15.43	0.309189	0.0263495
401	12.36	7.82	71.37	32.86	88.73	0.460418	0.0174025
401	6.01	4.33	18.5	6.31	17.03	0.341081	0.0290674
401	6.77	6.27	32.75	17.08	46.12	0.521527	0.0550455
401	4.75	4.41	15.69	5.34	14.41	0.340344	0.0498265
401	6.77	6.27	32.75	18.13	48.96	0.553588	0.0584294
401	10.6	8.83	70.23	24.68	66.65	0.351417	0.0207218
401	7.39	6.45	36.93	16.17	43.67	0.437855	0.0400661
401	10.97	9.77	82.62	40.92	110.49	0.49528	0.0309967
401	9.06	8.05	56.83	29.26	79	0.514869	0.039345
401	14.31	13.08	145.59	134.53	363.23	0.924033	0.0459093
401	9.76	9.39	71.03	39.89	107.72	0.561594	0.0429057
401	8.1	6.81	41.43	26.42	71.33	0.637702	0.0497139
401	7.27	6.58	37.22	19.18	51.78	0.515314	0.0499166
401	10.37	9.57	76.09	31.39	84.75	0.412538	0.0281485
401	11.36	9.81	86.75	82.57	222.94	0.951816	0.0563232
401	9.83	8.36	60.99	22.02	59.46	0.361043	0.0231823
401	6.65	5.41	27.18	9.1	24.58	0.334805	0.030944
401	4.82	3.98	14.59	7.34	19.83	0.503084	0.0655473
401	5.85	5.49	24.72	11.8	31.85	0.477346	0.0589406
401	7.61	6.77	39.55	18.28	49.34	0.4622	0.0414784
401	6.32	5.63	27.2	13.42	36.23	0.493382	0.053162
401	6.82	6.55	34.51	17.04	46	0.49377	0.0537176
401	6.59	5.76	29.25	25.34	68.4	0.866325	0.0885422
401	12.78	10.76	101.37	37.43	101.07	0.369241	0.0179319
401	7.09	5.47	29.46	12.62	34.07	0.428377	0.0354096
527	6.61	5.88	29.7	15.29	41.29	0.514815	0.0529423
527	5.63	5.06	21.74	10.65	28.75	0.48988	0.0596794
527	4.51	4.13	14.4	6.54	17.65	0.454167	0.0712932
527	7.03	5.54	29.03	17.06	46.06	0.587668	0.0491036
527	5.91	4.68	21.06	9.25	24.98	0.439221	0.0448104
527	6.04	5.25	23.86	13.72	37.04	0.575021	0.0622649
527	4.21	3.34	10.88	9.47	25.57	0.870404	0.126912
527	7.02	6.66	36.26	17.68	47.73	0.48759	0.0511059
527	4.43	4.07	13.8	11	29.7	0.797101	0.126527
527	7	6.35	33.87	22.75	61.44	0.671686	0.0663265
527	5.38	3.93	15.56	5.9	15.94	0.379177	0.0378883
527	7.72	7.2	43.01	26.63	71.89	0.619158	0.0578788
527	5.23	4.77	19.23	5.16	13.93	0.268331	0.0360699
527	2.7	2.59	5.37	2.06	5.57	0.383613	0.104659
527	6.89	6.02	30.94	15.53	41.92	0.501939	0.0474803
527	3.78	3.37	9.7	3.52	9.5	0.362887	0.0651729
527	6.66	5.97	28.64	14.58	39.36	0.509078	0.0493554
527	6.47	5.41	26.43	12.27	33.14	0.464245	0.0453035
527	4.69	4.61	16.8	6.63	17.9	0.394643	0.064268
527	6.38	4.72	22.91	11.43	30.86	0.498909	0.0440133
527	4.01	3.43	10.46	6.9	18.64	0.659656	0.107008
527	5.77	4.43	18.4	6.92	18.69	0.376087	0.0360229
527	3.29	2.71	6.76	2.31	6.24	0.341716	0.0648671
527	4.01	3.67	10.68	5.42	14.64	0.507491	0.0840555
527	6.8	5.28	27.5	12.97	35.02	0.471636	0.041249
527	6.47	6	29.59	13.86	37.43	0.468401	0.0511741
527	6.65	5.88	29.65	15.08	40.7	0.5086	0.0512786
527	13.29	10.56	101.76	45.61	123.14	0.448211	0.0194306
527	6.95	4.56	22.74	7.42	20.02	0.326297	0.0221029
527	7.31	5.51	30.25	15.98	43.15	0.528264	0.0409095
527	6.49	5.49	27.07	15.87	42.86	0.586258	0.0580554
527	6.12	5.33	24.84	13.17	35.55	0.530193	0.0574555
527	7.24	5.86	32.25	13.12	35.43	0.406822	0.0345715
527	5.03	4.15	15.92	5.36	14.48	0.336683	0.0421173
527	3.31	3	7.68	2.55	6.9	0.332031	0.0703163
527	6.85	5.57	28.67	12.26	33.1	0.427625	0.0381433
527	7.05	5.96	32.36	18.25	49.27	0.563968	0.0520829
527	6.27	4.83	22.05	11.44	30.9	0.518821	0.0464113
527	6.02	5.53	25.76	13.31	35.94	0.516693	0.0610083
527	11.55	7.9	58.09	26.17	70.65	0.450508	0.0169847
527	9.73	8.38	62.76	28.35	76.55	0.451721	0.0307762
527	11.3	9.05	74.83	52.38	141.43	0.699987	0.036302
527	7.62	5.52	30.86	12.8	34.56	0.414776	0.0289298
527	4.56	3.93	13.43	5.87	15.85	0.437081	0.0619075
527	9.03	7.09	48.67	24.02	64.85	0.493528	0.0326219
527	7.93	5.8	34.26	22.08	59.63	0.644483	0.0442771
527	7.26	6.3	34.9	26.33	71.08	0.754441	0.0688083
577	10.18	8.18	64.13	67.37	181.9	1.05052	0.0638592
577	8.67	4.93	32.64	27.25	73.57	0.834865	0.0418128
577	9.79	8.83	66.91	60.44	163.2	0.903303	0.0644134
577	10.5	6.93	54.28	40.28	108.77	0.742078	0.0347954
577	6.37	4.33	19.39	6.76	18.24	0.348633	0.0261534
577	9.07	8.3	54.09	23.57	63.64	0.435755	0.0315891
577	6.36	6.15	29.68	14.36	38.77	0.483827	0.0558191
577	3.89	3.38	10.2	3.85	10.38	0.377451	0.0654051
577	8.45	8.01	52.17	19.9	53.73	0.381445	0.0329825
577	8.94	8.32	55.12	23.34	63.01	0.42344	0.0326654
577	9.68	9.3	69.81	57.26	154.61	0.820226	0.0631285
577	11.3	10.29	87.58	31.54	85.15	0.360128	0.0218588
577	10.73	8.08	65.97	54.41	146.91	0.824769	0.0440433
577	19.77	15.68	241.88	88	237.6	0.363817	0.0113884
577	9.1	7.32	50.86	18.61	50.24	0.365906	0.0246957
577	17.39	13.03	138.39	42.97	116.02	0.310499	0.00817084
577	12.28	12.04	113.67	109.66	296.07	0.964722	0.0592179
577	14.94	11.85	129.38	59.72	161.23	0.461586	0.0179089
577	7.38	7.25	40.96	16.45	44.41	0.401611	0.0409258
690	11.81	8.87	80.39	54.87	148.14	0.682548	0.0333108
690	9.66	8.7	64.03	37.05	100.04	0.578635	0.0411014
690	13.46	12.36	128.17	68.09	183.84	0.531248	0.0279221
690	3.54	3.44	9.46	3.49	9.43	0.368922	0.0786712
690	3.72	3.18	9.06	2.56	6.91	0.282561	0.0497292
690	14.02	11.53	123.09	72.39	195.46	0.588106	0.0262685
690	3.63	3.24	8.77	2.81	7.59	0.32041	0.0587471
690	12.78	10.1	92.59	70.13	189.35	0.757425	0.0335978
690	3.81	3.56	10.48	3.39	9.16	0.323473	0.061295
762	5.74	4.93	21.86	8.41	22.72	0.384721	0.0444693
762	10.48	8.73	69.84	53.13	143.45	0.760739	0.046159
762	11.52	10.09	88.38	26.39	71.25	0.298597	0.0172616
762	11.39	8.62	75.07	24.55	66.29	0.327028	0.0166142
762	7.27	6.84	38.73	19.73	53.26	0.509424	0.051348
762	12.38	11.45	107.87	48.34	130.51	0.448132	0.0254768
762	4.22	3.51	11.09	3.42	9.23	0.308386	0.0455081
762	5.19	4.04	15.39	4.73	12.77	0.307342	0.0338344
762	9.1	7.42	51.51	24.05	64.93	0.4669	0.0319147
762	11.89	10.08	91.5	101.97	275.31	1.11443	0.0606634
762	5.26	4.13	15.78	7.55	20.37	0.478454	0.0518788
762	5.32	4.19	17.07	7.74	20.9	0.453427	0.0514051
762	6.51	5.75	28.55	15.15	40.89	0.530648	0.0549123
762	9.89	8.73	64.77	32.55	87.89	0.502547	0.0336482
762	3.53	3.17	8.18	2.35	6.35	0.287286	0.0534249
762	10.44	9.6	77.36	37.21	100.46	0.480998	0.0327008
762	6.87	5.28	27.31	10.64	28.74	0.389601	0.0328149
762	6.26	5.15	24.35	9	24.31	0.36961	0.0366876
762	4.93	4.08	15.02	5.01	13.53	0.333555	0.0418116
762	5.16	4.82	19.03	8.15	22.01	0.428271	0.059321
762	5.69	5.12	22.39	9.35	25.24	0.417597	0.0507545
762	6.42	5.4	26.63	9.49	25.61	0.356365	0.0358642
762	6.36	5.38	25.75	8.98	24.25	0.348738	0.0349064
762	5.88	5.31	23.31	7.99	21.58	0.342771	0.039302
762	10.86	9.69	80.64	48.54	131.05	0.601935	0.0378975
762	12.69	9.94	89.13	22.92	61.88	0.257152	0.0112158
762	7.15	5.91	28.34	11.47	30.97	0.404728	0.0313794
762	7.08	6.63	36.48	15.74	42.5	0.431469	0.0443512
762	11.21	9.83	85.35	94.23	254.41	1.10404	0.0668917
762	7.14	5.98	33.08	13.86	37.42	0.418984	0.0380775
762	6.42	5.74	28.47	12.7	34.28	0.446084	0.0479953
762	6.52	5.64	28.45	13.18	35.58	0.463269	0.0475524
762	4.29	4.18	13.99	4.89	13.21	0.349535	0.0619351
762	6.26	5.81	27.48	10.46	28.23	0.38064	0.0426392
762	6.28	5.46	26.62	10.28	27.76	0.386176	0.0415063
762	6.28	5.42	26.47	15.46	41.75	0.584057	0.062421
762	6.35	5.65	27.3	9.84	26.58	0.36044	0.0384303
762	7.93	6.64	40.2	24.84	67.07	0.61791	0.0498118
865	5.5	5.12	21.46	7.66	20.68	0.356943	0.0460406
865	13.26	9.54	93.59	51.09	137.95	0.545892	0.0219132
865	4.96	4.14	15.9	8.93	24.1	0.561635	0.0731824
865	12.27	10.27	88.48	32.89	88.81	0.371722	0.0178045
865	6.13	5.23	24.49	8.52	22.99	0.347897	0.0369878
865	6.21	5.63	27.24	15.89	42.9	0.583333	0.0663512
865	7.79	6.7	40.4	22.26	60.1	0.55099	0.0470883
865	6.42	5.48	24.44	9.74	26.29	0.398527	0.036809
865	4.5	3.92	13.22	5.98	16.16	0.452345	0.0656241
865	5.9	4.73	21.57	15.97	43.13	0.74038	0.0777587
865	6.92	6.17	32.95	19.43	52.45	0.589681	0.0586347
865	7.24	6.67	36.54	19.45	52.52	0.532293	0.0512512
865	6.54	5.71	28.7	16.1	43.47	0.560976	0.0575563
865	11.77	10.36	94.83	41.14	111.07	0.433829	0.025231
865	12.59	10.28	99.73	56.06	151.35	0.562118	0.0280916
865	6.33	5.91	28.26	12.27	33.13	0.434183	0.0483764
865	6.94	6.64	34.07	11.58	31.26	0.339888	0.0346442
883	4.69	3.94	14.25	5.09	13.75	0.357193	0.04934
883	8.5	5.83	35.94	12.82	34.61	0.356706	0.0208752
883	5.37	4.65	18.93	5.77	15.58	0.304807	0.0372609
883	8.27	7.19	45.88	23.52	63.49	0.512642	0.0415835
883	4.38	4.35	14.56	3.96	10.7	0.271978	0.0471273
883	6.66	5.57	28.33	15.75	42.54	0.555948	0.053316
883	6.13	5.46	26.07	19.63	53	0.752973	0.0852195
883	9.97	8.73	66.25	42.57	114.94	0.642566	0.0429554
883	6.95	6.24	32.37	10.28	27.76	0.317578	0.0306224
883	6.03	5.58	26.07	9.82	26.52	0.376678	0.0447878
883	6.89	6.25	32.93	11.08	29.93	0.336471	0.0338752
883	5.6	4.69	19.91	8.45	22.81	0.42441	0.0481163
883	5.61	4.88	20.07	9.32	25.16	0.464375	0.052787
883	5.66	4.59	19.46	8.62	23.28	0.44296	0.0475399
883	4.21	3.29	10.08	2.97	8.01	0.294643	0.0398025
883	7.23	5.93	32	6.62	17.86	0.206875	0.0175163
929	11.66	10	90.27	45.88	123.87	0.508253	0.0289419
929	13.73	13.14	139.92	85.18	229.99	0.608776	0.0329099
929	13.21	11.63	115.97	79.32	214.16	0.68397	0.0344092
929	15.57	12.92	153.08	111.32	300.57	0.727201	0.0294922
929	9.92	6.66	48.41	13.45	36.31	0.277835	0.013778
929	10.11	8.93	69.83	67.11	181.2	0.961048	0.0649432
929	7.01	5.52	29.58	13.93	37.62	0.470926	0.0404387
929	8.86	6.91	46.85	21.02	56.76	0.448666	0.0302226
929	8.59	7.68	51.36	60.2	162.54	1.17212	0.0949767
929	9.6	8.78	65.53	64.69	174.66	0.987181	0.0731179
929	10.71	9.48	77.77	50.26	135.7	0.646265	0.0409123
929	9.15	7.03	48.67	29.31	79.14	0.602219	0.0382607
929	15.63	15.2	180.21	91.35	246.64	0.506909	0.0239239
929	10.43	8.1	66.12	79.6	214.92	1.20387	0.0701552
929	6.93	5.62	30.07	14.6	39.42	0.485534	0.0438685
929	8.57	6.93	45.84	21.77	58.78	0.474913	0.0345872
929	7.2	6.09	32.08	17.6	47.53	0.548628	0.0471536
929	7.99	5.95	34.34	13.41	36.21	0.390507	0.0262899
929	6.74	5.79	29.46	15.21	41.08	0.516293	0.0496763
929	11.13	10.24	88.59	29.27	79.02	0.330398	0.0212294
929	7.45	6.78	39.06	19.1	51.58	0.488991	0.0461918
929	7.46	5.56	31.77	10.86	29.34	0.341832	0.0261585
929	4.47	4.01	13.65	4.7	12.68	0.344322	0.052623
1051	11.45	11.23	97.5	54.45	147.03	0.558462	0.0362728
1051	6.1	4.91	21.79	7.29	19.69	0.334557	0.0321172
1051	4.49	4.11	14.41	6.18	16.69	0.428869	0.0682731
1051	5.04	4.47	17.03	6.44	17.38	0.378156	0.050303
1051	5.51	4.76	19.85	5.61	15.13	0.28262	0.0335358
1051	14.15	11.76	126.99	81.61	220.35	0.642649	0.0288054
1051	12.59	10.81	101.52	57.29	154.67	0.564322	0.0287079
1051	4.11	3.11	9.35	6.87	18.56	0.734759	0.0989535
1051	10.76	7.85	64.69	22.23	60.01	0.343639	0.0178444
1051	12.17	10.48	97.33	28.24	76.25	0.290147	0.0156673
1051	6.02	5.7	23.85	10.36	27.98	0.434382	0.0474865
1051	9.95	7.56	50.09	17	45.9	0.339389	0.0172576
1051	12.48	10.93	106.43	106.08	286.41	0.996711	0.0545745
1051	8.74	5.89	34.2	14.6	39.43	0.426901	0.0218685
1051	11.5	9.78	86.98	55.78	150.61	0.641297	0.0366763
1051	8.14	6.73	37.83	14.68	39.64	0.388052	0.0272178
1051	6.68	5.99	31.13	38.01	102.62	1.22101	0.127517
1051	5.17	3.47	11.43	3.66	9.88	0.32021	0.0264856
1051	6.05	4.28	17.63	7.08	19.11	0.401588	0.0319718
1209_20H	7.36	4.31	23.36	7.2	19.43	0.308219	0.0180592
1209_20H	9.3	7.58	53.81	19.83	53.54	0.368519	0.0246532
1209_20H	12.8	9.96	95.96	32.73	88.36	0.34108	0.0156069
1209_20H	6.44	6.05	29.15	6.71	18.11	0.230189	0.0251226
1209_20H	7.72	7.1	41.33	12.42	33.52	0.300508	0.0269942
1209_20H	7.34	5.85	31.55	7.52	20.29	0.238352	0.0190165
1209_20H	5.65	4.13	17.86	10.43	28.15	0.583987	0.0578281
1209_20H	8.14	7.05	40.73	8.56	23.11	0.210164	0.0158709
1209_20H	8.6	7.17	45.22	13.16	35.54	0.291022	0.02069
1209_20H	9.28	7.85	56.33	18.94	51.15	0.336233	0.0236993
1209_20H	12.36	9.83	84.15	25.76	69.55	0.30612	0.0136424
1209_20H	9.63	7.7	57.06	65.53	176.93	1.14844	0.0733772
1209_20H	10.07	9.32	74.52	66.79	180.33	0.896269	0.0654068
1209_20H	8.63	8.41	55.11	18.99	51.27	0.344584	0.0295456
1209_20H	6.82	5.12	23.39	7.76	20.95	0.331766	0.0244629
1209_20H	9.73	7.27	48.54	17.86	48.21	0.367944	0.0193884
1209_20H	15.49	12.9	154.89	109.93	296.81	0.709729	0.0295775
1209_20H	8.23	7.7	45.66	18.26	49.31	0.399912	0.0327568
1209_20H	10.81	6.62	53.71	22.94	61.95	0.427109	0.01816
1209_20H	10.42	8.47	66.25	24.98	67.45	0.377057	0.0220795
1209_20H	8.22	7.15	43.97	31.01	83.72	0.705254	0.0558324
1209_20H	9.35	8.45	59.4	24.67	66.6	0.41532	0.030181
1209_20H	9.95	8.75	67.58	65.97	178.12	0.976176	0.0669695
1209_20H	7.58	5.34	30.44	12.78	34.5	0.419842	0.0293443
1209_20H	5.9	5.38	24.09	6.59	17.81	0.273557	0.032087
1209_20H	7.4	5.86	33.32	13.47	36.37	0.404262	0.0332409
1209_20H	7.97	7.12	43.63	18.6	50.21	0.426312	0.0367399
1209_20H	9.62	7.97	55.31	21.72	58.65	0.392696	0.0243969
1209_20H	2.83	2.59	5.62	1.86	5.01	0.330961	0.0820642
1209_20H	14.56	10.25	115.22	76.27	205.92	0.661951	0.0247098
1209_20H	7.4	5.62	31.6	13.23	35.71	0.418671	0.0326486
1209_20H	9.16	8.88	62.54	28.36	76.58	0.45347	0.0368994
1209_20H	7.95	5.21	27.74	13.51	36.47	0.487022	0.0268877
1209_20H	14.5	13.21	143.73	112.24	303.04	0.780909	0.0368166
1209_20H	5.72	4.78	21.01	8.12	21.92	0.386483	0.0433878
1209_20H	17.79	16.1	212.98	100.22	270.59	0.470561	0.0178003
1209_20H	15.29	10.14	118.03	74.37	200.81	0.630094	0.0208054
1209_20H	9.55	8.03	58.89	56.63	152.9	0.961623	0.0650184
1209_20H	9.6	7.55	47.15	11.43	30.85	0.242418	0.0129191
1209_20H	10.3	9.01	68.68	64.33	173.7	0.936663	0.0588711
1209_20H	11.95	9.96	89.89	53.73	145.08	0.597731	0.0314857
1209_20H	17.26	14.46	179.79	115.33	311.4	0.641471	0.0224295
1209_20H	11.9	9	76.33	25.76	69.55	0.337482	0.0152864
1209_20H	12.94	11.35	111.85	59.45	160.5	0.531515	0.0274378
1209_20H	13.92	10.64	111.65	106.89	288.62	0.957367	0.0396296
1209_20H	11.16	11	91.22	50.87	137.36	0.557663	0.036599
1209_21H	15.62	13.64	165.7	74.6	201.43	0.450211	0.0195747
1209_21H	11.04	7.76	63.24	29.79	80.42	0.471063	0.0221393
1209_21H	16.29	15.07	189.21	144.15	389.21	0.761852	0.0333466
1209_21H	7.6	7.41	41.62	12.87	34.76	0.309226	0.0293182
1209_21H	10.81	9.85	81.72	46.98	126.85	0.57489	0.0371908
1209_21H	6.06	4.47	19.88	5.42	14.64	0.272636	0.0243546
1209_21H	11.27	9.91	78.51	24.59	66.4	0.313209	0.0171786
1209_21H	12.21	10.56	98.07	60.08	162.21	0.612624	0.0330052
1209_21H	6.52	5.56	27.4	8.09	21.83	0.295255	0.0291881
1209_21H	11.6	10.44	93.44	74.46	201.04	0.796875	0.0477034
1209_21H	6.38	5.63	27.49	7.86	21.23	0.285922	0.0302664
1209_21H	8.08	6.41	37.19	12.96	35	0.348481	0.0245681
1209_21H	6.38	5.63	27.49	8.92	24.09	0.324482	0.0343481
1209_21H	10.02	8.95	67.28	23.44	63.3	0.348395	0.0232999
1209_21H	12.8	10.26	98.64	95.94	259.03	0.972628	0.0457478
1209_21H	7.94	7.13	38.37	14.03	37.89	0.36565	0.0280283
1209_21H	8.98	8.65	50.47	12.42	33.54	0.246087	0.0171511
1257	13.68	12.33	129.4	59.61	160.96	0.460665	0.0232842
1257	14.2	12.4	124.02	45.95	124.06	0.370505	0.016048
1257	11.25	10.05	83.99	32.05	86.55	0.381593	0.0225097
1257	11.74	10.32	90.15	37.93	102.4	0.420743	0.0234411
1257	12.98	11.19	102.94	49.22	132.91	0.478143	0.022507
1257	11.79	9.48	85.63	68.3	184.42	0.797618	0.0416754
1257	9.25	8.2	58.12	54.27	146.54	0.933758	0.0685701
1257	4.76	3.7	13.28	4.4	11.89	0.331325	0.0407973
1257	14.47	13.43	151.27	134.28	362.54	0.887684	0.0443206
1257	10.96	10.39	88.07	74.12	200.13	0.841603	0.0562994
1257	12.44	9.67	90.82	94.05	253.92	1.03556	0.0488537
1257	10.41	9.35	74.69	34.98	94.45	0.468336	0.0310076
1257	14.57	13.08	145.63	97.11	262.21	0.666827	0.0313968
1257	21.53	18.42	305.63	320.18	864.5	1.04761	0.032082
1257	16.42	13.13	166.88	65.64	177.23	0.393337	0.0148269
1257	7.85	6.34	36.33	15.82	42.72	0.435453	0.0327037
1257	12.35	10.42	97.37	36.34	98.11	0.373216	0.0192923
1257	10.33	8.97	69.91	23.49	63.43	0.336003	0.0213099
1257	9.72	7.83	54.41	33.23	89.72	0.610733	0.0361852
1257	13.52	12.48	131.44	135.49	365.82	1.03081	0.0548248
1257	13.66	13.26	138.07	122.13	329.75	0.884551	0.0479149
1257	14.17	12.68	132.03	88.41	238.72	0.669621	0.0310736
1257	12.57	11.44	110.54	93.8	253.26	0.848562	0.0472277
1257	13.48	12.2	118.69	68.92	186.07	0.580672	0.0281369
1257	13.88	12.26	130.83	104.53	282.23	0.798976	0.0390906
1257	10.25	8.05	63.31	43.05	116.23	0.679987	0.0399762
1257	15.73	12.73	154.43	143.33	387	0.928123	0.0368257
1331	7.54	6.02	34.86	21.09	56.95	0.604991	0.0491997
1331	10.7	9.88	81.06	45.93	124.02	0.566617	0.0374926
1331	6.86	6.24	32.95	13.24	35.75	0.401821	0.0410124
1331	9.46	7.96	56.74	32.26	87.11	0.568558	0.0381058
1331	10.31	9.2	73.55	68.54	185.07	0.931883	0.0625415
1331	10.94	10.19	84.68	37.47	101.17	0.442489	0.0286175
1331	7.22	5.69	29.9	16.97	45.81	0.567559	0.045089
1331	12.45	11.12	103.94	47.76	128.96	0.459496	0.0247489
1331	5.92	4.91	22.52	11.51	31.08	0.511101	0.0554766
1331	10.24	8.93	70	42.03	113.49	0.600429	0.0391435
1331	9.55	7.64	55.56	15.84	42.77	0.285097	0.0181863
1331	6.74	6.2	32.66	13.22	35.68	0.404776	0.0431769
1331	6.77	5.84	29.34	9.04	24.4	0.308112	0.0291342
1331	7.71	6.29	37.61	11.76	31.76	0.312683	0.0256593
1331	8.56	6.47	39.63	16.56	44.71	0.417865	0.0264021
1331	11.41	11.22	94.82	98.91	267.05	1.04313	0.0665861
1331	8.4	6.3	40.25	30.47	82.26	0.757019	0.0514085
1331	12.69	10.22	97.23	69.83	188.54	0.718194	0.034171
1331	8.57	6.71	44.51	25.45	68.7	0.571782	0.0404339
1331	12.78	12.35	122.33	86.41	233.32	0.706368	0.0413972
1331	13.22	11.34	114.41	63.12	170.44	0.5517	0.0273195
1331	12.6	11.72	110.62	60.94	164.54	0.550895	0.0304643
1331	13.55	11.77	124.51	77.32	208.76	0.620994	0.0310795
Bass River	11.23	8.61	70.37	34.34	92.72	0.487992	0.0242472
Bass River	16.02	12.67	152.74	74.57	201.33	0.488215	0.0181375
Bass River	11.2	9.02	71.53	56.55	152.69	0.790577	0.0402512
Bass River	10.08	6.5	47.2	32.88	88.78	0.69661	0.0321033
Bass River	10.2	3.83	28.53	13.22	35.7	0.463372	0.0124575
Bass River	6.48	4.35	20.96	10.7	28.89	0.510496	0.0393241
Bass River	17.16	12.72	164.65	140.83	380.25	0.855329	0.0278704
Bass River	9.9	7.17	49.39	19.88	53.67	0.402511	0.0204885
Bass River	16.08	14.05	152.93	76.51	206.59	0.500294	0.0184018
Bass River	14.3	11.69	128.7	82.82	223.61	0.643512	0.0283222
Bass River	11.22	7.69	62.86	37	99.9	0.58861	0.0261953
