# Supplementary material for: Quantification of dissolution and diagenetic overgrowth in early Eocene calcareous nannofossils through circular polarised light microscopy
Source: Copernicus journal article supplement (doi:10.5194/jm-44-673-2025), 2025-12-12
Supplement: Supplementary file [file jm-44-673-2025-supplement-title-page.pdf › jm-44-673-2025-supplement-title-page.pdf]

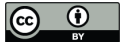

*Supplement of*

## **Quantification of dissolution and diagenetic overgrowth in early Eocene calcareous nannofossils through circular polarised light microscopy**

**Alexander J. Clark et al.**

*Correspondence to:* Alexander J. Clark ([aclark@ethz.ch](mailto:aclark@ethz.ch))

- [jm-44-673-2025-supplement-title-page.pdf](#)
- [Supplementary\\_material\\_1\\_r1.xlsx](#)

The copyright of individual parts of the supplement might differ from the article licence.
